# Supplementary material for: Metal-free sequential reaction via a propargylation, annulation and isomerization sequence for the one-pot synthesis of 2,3-disubstituted benzofurans
Source: Royal Society of Chemistry journal article supplement (doi:10.1039/c4ra05503a), 2014-07-28

## Supplementary Material

# Metal-free sequential reaction *via* a propargylation, annulation and isomerization sequence for the one-pot synthesis of 2,3-disubstituted benzofurans

Wen-Tao Li, Wen-Hui Nan and Qun-Li Luo\*

*Key Laboratory of Applied Chemistry of Chongqing Municipality, College of Chemistry and Chemical Engineering, Southwest University, Chongqing, 400715, China. E-mail:*

[qlluo@swu.edu.cn](mailto:qlluo@swu.edu.cn)

## Contents

|                                                                                              |            |
|----------------------------------------------------------------------------------------------|------------|
| <b>Experimental Section</b> .....                                                            | <b>S2</b>  |
| General.....                                                                                 | S2         |
| General procedure for the one-pot sequential synthesis of benzofuran <b>4</b> (Table 4)..... | S2         |
| <b>Reference</b> .....                                                                       | <b>S10</b> |
| <b>NMR and MS spectra</b> .....                                                              | <b>S11</b> |
| 2-benzyl-5-( <i>tert</i> -butyl)-3-(4-methoxyphenyl)benzofuran (4aa).....                    | S11        |
| 2-benzyl-5-( <i>tert</i> -butyl)-3-( <i>p</i> -tolyl)benzofuran (4ab).....                   | S13        |
| 2-benzyl-5-( <i>tert</i> -butyl)-3-phenylbenzofuran (4ac).....                               | S14        |
| 2-benzyl-5-( <i>tert</i> -butyl)-3-(naphthalen-1-yl)benzofuran (4ad).....                    | S15        |
| 2-benzyl-3-(4-bromophenyl)-5-( <i>tert</i> -butyl)benzofuran (4ae).....                      | S17        |
| 2-benzyl-5-methoxy-3-(4-methoxyphenyl)benzofuran (4ba).....                                  | S18        |
| 2-benzyl-5-methoxy-3-( <i>p</i> -tolyl)benzofuran (4bb).....                                 | S19        |
| 2-benzyl-5-methoxy-3-phenylbenzofuran (4bc).....                                             | S21        |
| 2-benzyl-1-(4-methoxyphenyl)naphtho[2,1- <i>b</i> ]furan (4ca).....                          | S22        |
| 2-benzyl-1-( <i>p</i> -tolyl)naphtho[2,1- <i>b</i> ]furan (4cb).....                         | S23        |
| 2-benzyl-1-phenylnaphtho[2,1- <i>b</i> ]furan (4cc).....                                     | S25        |
| 2-benzyl-1-(naphthalen-1-yl)naphtho[2,1- <i>b</i> ]furan (4cd).....                          | S26        |
| 2-benzyl-3-(4-methoxyphenyl)-5-methylbenzofuran (4da).....                                   | S27        |
| 2-benzyl-5-methyl-3-( <i>p</i> -tolyl)benzofuran (4db).....                                  | S29        |
| 2-benzyl-5-methyl-3-phenylbenzofuran (4dc).....                                              | S30        |
| 2-benzyl-4,6-dimethyl-3-( <i>p</i> -tolyl)benzofuran (4eb).....                              | S31        |
| 2-benzyl-4,6-dimethyl-3-phenylbenzofuran (4ec).....                                          | S33        |
| 2-benzyl-3-(4-bromophenyl)-4,6-dimethylbenzofuran (4ee).....                                 | S34        |
| 2-benzyl-3-(4-methoxyphenyl)-5-phenylbenzofuran (4fa).....                                   | S36        |
| 2-benzyl-5-phenyl-3-( <i>p</i> -tolyl)benzofuran (4fb).....                                  | S37        |
| 2-benzyl-3,5-diphenylbenzofuran (4fc).....                                                   | S39        |
| 2-benzyl-5-chloro-3-(4-methoxyphenyl)benzofuran (4ga).....                                   | S40        |
| 2-benzyl-5-chloro-3-phenylbenzofuran (4gc).....                                              | S41        |
| <i>N</i> -(2-benzyl-3-(4-methoxyphenyl)benzofuran-5-yl)acetamide (4ha).....                  | S42        |
| <i>N</i> -(2-benzyl-3-phenylbenzofuran-5-yl)acetamide (4hc).....                             | S44        |
| <i>tert</i> -butyl (2-benzyl-3-(4-methoxyphenyl)benzofuran-5-yl)carbamate (4ia).....         | S45        |
| <i>tert</i> -butyl (3-(4-methoxyphenyl)-2-pentylbenzofuran-5-yl)carbamate (4if).....         | S48        |
| 1-(4-methoxyphenyl)-2-pentyl-naphtho[2,1- <i>b</i> ]furan (4cf).....                         | S50        |

## Experimental Section

### General.

Commercially available reagents were used as received. *t*-BuOK (98%) was purchased from Aladdin® Reagent (Shanghai, China). Solvents for reactions were dried with standard procedures and stored with Schlenk flasks over molecular sieves if not noted otherwise. All solvents for chromatographic separations were distilled before use. Column chromatography was carried out with Haiyang 200–300 mesh silica gel (Qingdao, China). <sup>1</sup>H and <sup>13</sup>C NMR spectra were recorded on a 300 MHz or 600 MHz spectrometer (Bruker) at 293 K and the chemical shifts ( $\delta$ ) were internally referenced by the residual solvent signals relative to tetramethylsilane (CDCl<sub>3</sub> at 7.26 ppm for <sup>1</sup>H, and at 77.00 ppm for <sup>13</sup>C). Data are reported as (s = singlet, d = doublet, t = triplet, q = quartet, m = multiplet; coupling constant(s) in Hz; integration). High resolution mass spectra (HRMS) of **4aa**, **4ee**, **4ga** and **4ia** were obtained on a APEXIII 7.0 TESLA FTMS (Bruker Daltonics) or Micromass GCT Premier (Waters) mass spectrometer at the Department of Analytical Chemistry, Shanghai Institute of Organic Chemistry, Chinese Academy of Sciences (CAS), and those of the rest were on a LCMS TOF 6224 (Agilent) mass spectrometer at National Center for Drug Screening, Shanghai Institute of Materia Medica, CAS. All the known products were confirmed by comparison with spectroscopic analysis of the authentic samples. The yields in Tables 1–4 refer to isolated yields of compounds (average of two runs).

### General procedure for the one-pot sequential synthesis of benzofuran **4** from phenol **1** with propargyl alcohol **2** (Table 4).

In a typical run, a 25 mL reaction flask was charged with the solution of 4-toluenesulphonic acid monohydrate (TsOH·H<sub>2</sub>O, 19 mg, 0.1 mmol) in CH<sub>2</sub>Cl<sub>2</sub> (4 mL). Then propargyl alcohol **2** (0.5 mmol) and phenol **1** (1 mmol) were added in sequential order, and the mixture was stirred at ambient temperature until **2** had disappeared as monitored by TLC (typically, for 2–5 h). For the reactions that need to be heated, the flask was equipped with a condenser and the mixture was stirred at the indicated temperature until **2** had disappeared as monitored by TLC (similarly hereinafter). Then potassium *tert*-butoxide (153 mg, 1.25 mmol) was recharged *in situ*. The reaction mixture was continually stirred at ambient temperature until the new component that generated at the first stage had fully transformed as monitored by TLC (typically, for 5–8 h), then diluted with CH<sub>2</sub>Cl<sub>2</sub> (10 mL) and washed with brine (10 mL). The

aqueous phase was extracted with CH<sub>2</sub>Cl<sub>2</sub> (two portions of 10 mL each). The combined organic phase was washed with deionized water and brine, dried over anhydrous MgSO<sub>4</sub>, and then filtered and concentrated. The crude product was purified by column chromatography (silica, hexane or hexane/EtOAc mixture as eluent). Any deviations from this procedure are noted in Table 4.

**2-benzyl-5-(*tert*-butyl)-3-(4-methoxyphenyl)benzofuran (4aa).**

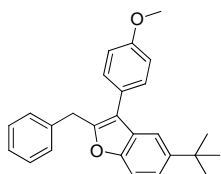

A white amorphous solid (166 mg, 90% yield). <sup>1</sup>H NMR (CDCl<sub>3</sub>, 300 MHz): δ 7.46 (d, *J* = 1.2 Hz, 1H), 7.39–7.10 (m, 9H), 6.95 (d, *J* = 8.7 Hz, 2H), 4.08 (s, 2H), 3.78 (s, 3H), 1.27 (s, 9H). <sup>13</sup>C NMR (CDCl<sub>3</sub>, 75 MHz): δ 158.8, 152.5, 152.4, 145.7, 138.1, 130.2, 128.5, 128.45, 128.42, 126.5, 124.9, 121.7, 118.0, 115.7, 114.3, 110.4, 55.3, 34.7, 32.8, 31.9. HRMS (ESI-FTMS) calcd for C<sub>26</sub>H<sub>26</sub>NaO<sub>2</sub> (M<sup>+</sup>+Na): 393.1825; found: 393.1814.

**2-benzyl-5-(*tert*-butyl)-3-(*p*-tolyl)benzofuran (4ab).**

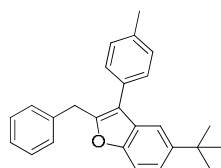

A white amorphous solid (132 mg, 74% yield). <sup>1</sup>H NMR (CDCl<sub>3</sub>, 300 MHz): δ 7.56 (d, *J* = 1.2 Hz, 1H), 7.41 (d, *J* = 8.0 Hz, 2H), 7.37–7.18 (m, 9H), 4.18 (s, 2H), 2.43 (s, 3H), 1.35 (s, 9H). <sup>13</sup>C NMR (CDCl<sub>3</sub>, 75 MHz): δ 152.54, 152.50, 145.8, 138.1, 136.9, 129.65, 129.58, 129.0, 128.54, 128.45, 128.3, 126.5, 121.7, 118.3, 115.8, 110.4, 34.8, 32.8, 31.9, 24.3. HRMS (ESI-TOF) calcd for C<sub>26</sub>H<sub>27</sub>O (M<sup>+</sup>+H): 355.2056; found: 355.2053.

**2-benzyl-5-(*tert*-butyl)-3-phenylbenzofuran (4ac).<sup>1</sup>**

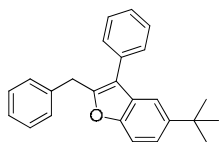

A white amorphous solid (134 mg, 79% yield). <sup>1</sup>H NMR (CDCl<sub>3</sub>, 300 MHz): δ 7.60–7.45 (m, 5H), 7.41–7.16 (m, 8H), 4.18 (s, 2H), 1.35 (s, 9H). <sup>13</sup>C NMR (CDCl<sub>3</sub>, 75 MHz): δ 152.7, 152.5, 145.8, 138.0, 132.7, 129.1, 128.9, 128.6, 128.4, 128.2, 127.2, 126.5, 121.8, 118.4, 115.7, 110.4, 34.8, 32.8, 31.9.

**2-benzyl-5-(*tert*-butyl)-3-(naphthalen-1-yl)benzofuran (4ad).**

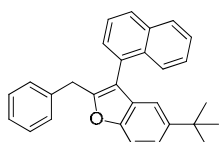

A white amorphous solid (167 mg, 86% yield).  $^1\text{H}$  NMR ( $\text{CDCl}_3$ , 300 MHz):  $\delta$  7.94 (d,  $J = 8.5$  Hz, 2H), 7.81 (d,  $J = 8.4$  Hz, 1H), 7.60–7.48 (m, 3H), 7.46–7.31 (m, 3H), 7.25–7.12 (m, 6H), 4.07 (d,  $J = 15.7$  Hz, 1H), 3.96 (d,  $J = 15.7$  Hz, 1H), 1.25 (s, 9H).  $^{13}\text{C}$  NMR ( $\text{CDCl}_3$ , 75 MHz):  $\delta$  155.1, 152.5, 145.8, 137.7, 133.7, 132.5, 130.07, 129.5, 128.6, 128.4, 128.34, 128.32, 128.2, 126.4, 126.3, 126.01, 125.98, 125.6, 121.7, 116.7, 116.5, 110.3, 34.7, 33.1, 31.8. HRMS (ESI-TOF) calcd for  $\text{C}_{29}\text{H}_{27}\text{O}$  ( $\text{M}^+\text{H}$ ): 391.2056; found: 391.2048.

**2-benzyl-3-(4-bromophenyl)-5-(*tert*-butyl)benzofuran (4ae).**<sup>1</sup>

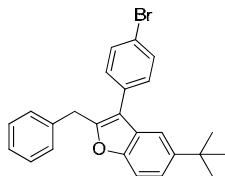

A white amorphous solid (132 mg, 63% yield).  $^1\text{H}$  NMR ( $\text{CDCl}_3$ , 300 MHz):  $\delta$  7.61 (d,  $J = 8.3$  Hz, 2H), 7.50 (s, 1H), 7.41–7.32 (m, 4H), 7.31–7.17 (m, 5H), 4.15 (s, 2H), 1.35 (s, 9H).  $^{13}\text{C}$  NMR ( $\text{CDCl}_3$ , 75 MHz):  $\delta$  152.9, 152.5, 146.0, 137.7, 132.0, 131.6, 130.7, 128.6, 128.4, 127.8, 126.6, 122.1, 121.2, 117.4, 115.4, 110.5, 34.8, 32.8, 31.8.

**2-benzyl-5-methoxy-3-(4-methoxyphenyl)benzofuran (4ba).**

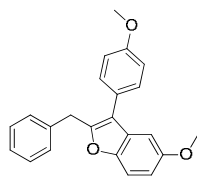

A white amorphous solid (137 mg, 80% yield).  $^1\text{H}$  NMR ( $\text{CDCl}_3$ , 300 MHz):  $\delta$  7.42 (d,  $J = 8.7$  Hz, 2H), 7.35–7.18 (m, 6H), 7.05–6.98 (m, 3H), 6.86 (dd,  $J = 2.6$  Hz, 8.8 Hz, 1H), 4.15 (s, 2H), 3.85 (s, 3H), 3.80 (s, 3H).  $^{13}\text{C}$  NMR ( $\text{CDCl}_3$ , 75 MHz):  $\delta$  158.9, 156.0, 153.1, 149.2, 138.0, 130.1, 129.4, 128.6, 128.4, 126.5, 124.7, 118.0, 114.3, 112.3, 111.5, 102.4, 56.0, 55.3, 32.9. HRMS (ESI-TOF) calcd for  $\text{C}_{23}\text{H}_{21}\text{O}_3$  ( $\text{M}^+\text{H}$ ): 345.1485; found: 345.1481.

**2-benzyl-5-methoxy-3-(*p*-tolyl)benzofuran (4bb).**

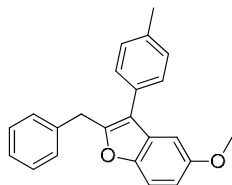

A white amorphous solid (123 mg, 75% yield).  $^1\text{H}$  NMR ( $\text{CDCl}_3$ , 300 MHz):  $\delta$  7.40 (d,  $J = 8.0$  Hz, 2H), 7.36–7.18 (m, 8H), 7.02 (d,  $J = 2.5$  Hz, 1H), 6.86 (dd,  $J = 2.6$  Hz, 8.8 Hz, 1H), 4.17 (s, 2H), 3.80 (s, 3H), 2.42 (s, 3H).  $^{13}\text{C}$  NMR ( $\text{CDCl}_3$ , 75 MHz):  $\delta$  156.0, 153.2, 149.2, 138.0, 137.0, 129.6, 129.5, 129.3, 128.8, 128.6, 128.5, 126.5, 118.3, 112.4, 111.5, 102.3, 56.0, 32.9, 21.3. HRMS (ESI-TOF) calcd for  $\text{C}_{23}\text{H}_{21}\text{O}_2$  ( $\text{M}^+\text{H}$ ): 329.1536; found: 329.1533.

**2-benzyl-5-methoxy-3-phenylbenzofuran (4bc).**<sup>1</sup>

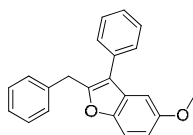

A white amorphous solid (116 mg, 74% yield).  $^1\text{H}$  NMR ( $\text{CDCl}_3$ , 300 MHz):  $\delta$  7.53–7.45 (m, 4H), 7.43–7.19 (m, 7H), 7.03 (d,  $J = 2.4$  Hz, 1H), 6.87 (dd,  $J = 2.5$  Hz, 8.9 Hz, 1H), 4.18 (s, 2H), 3.81 (s, 3H).  $^{13}\text{C}$  NMR ( $\text{CDCl}_3$ , 75 MHz):  $\delta$  155.9, 153.3, 149.1, 137.8, 132.4, 129.0, 128.9, 128.8, 128.5, 128.3, 127.2, 126.4, 118.3, 112.4, 111.4, 102.2, 55.9, 32.8.

**2-benzyl-1-(4-methoxyphenyl)naphtho[2,1-*b*]furan (4ca).**

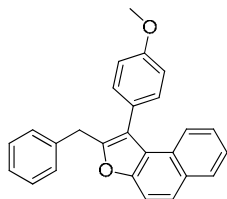

A white amorphous solid (127 mg, 70% yield).  $^1\text{H}$  NMR ( $\text{CDCl}_3$ , 300 MHz):  $\delta$  7.90 (d,  $J = 8.0$  Hz, 1H), 7.77 (d,  $J = 8.2$  Hz, 1H), 7.68 (d,  $J = 8.9$  Hz, 1H), 7.61 (d,  $J = 8.9$  Hz, 1H), 7.43 (d,  $J = 8.6$  Hz, 2H), 7.38 (t,  $J = 7.5$  Hz, 1H), 7.33–7.18 (m, 6H), 7.06 (d,  $J = 8.6$  Hz, 2H), 4.07 (s, 2H), 3.92 (s, 3H).  $^{13}\text{C}$  NMR ( $\text{CDCl}_3$ , 75 MHz):  $\delta$  159.2, 152.7, 151.6, 138.2, 131.6, 130.7, 128.8, 128.53, 128.51, 128.1, 126.4, 126.4, 125.8, 125.7, 124.8, 124.0, 123.1, 122.4, 119.5, 114.1, 112.3, 55.3, 32.6. HRMS (ESI-TOF) calcd for  $\text{C}_{26}\text{H}_{21}\text{O}_2$  ( $\text{M}^+\text{+H}$ ): 365.1536; found: 365.1519.

**2-benzyl-1-(*p*-tolyl)naphtho[2,1-*b*]furan (4cb).<sup>2</sup>**

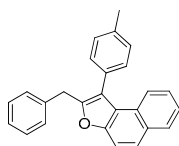

A white amorphous solid (139 mg, 80% yield).  $^1\text{H}$  NMR ( $\text{CDCl}_3$ , 600 MHz):  $\delta$  7.86 (d,  $J = 8.1$  Hz, 1H), 7.78 (d,  $J = 8.3$  Hz, 1H), 7.64 (d,  $J = 8.9$  Hz, 1H), 7.59 (d,  $J = 8.9$  Hz, 1H), 7.39 (d,  $J = 8.0$  Hz, 2H), 7.34 (dt,  $J = 1.1$  Hz, 7.5 Hz, 4H), 7.30 (d,  $J = 8.0$  Hz, 2H), 7.28–7.23 (m, 3H), 7.22–7.20 (m, 2H), 7.19–7.14 (m, 1H), 4.04 (s, 2H), 2.45 (s, 3H).  $^{13}\text{C}$  NMR ( $\text{CDCl}_3$ , 150 MHz):  $\delta$  152.7, 151.7, 138.3, 137.5, 130.8, 130.4, 129.4, 128.8, 128.53, 128.51, 128.2, 126.4, 125.7, 124.8, 124.0, 123.2, 122.3, 112.3, 32.6, 21.3. HRMS (ESI-TOF) calcd for  $\text{C}_{26}\text{H}_{21}\text{O}$  ( $\text{M}^+\text{+H}$ ): 349.1587; found: 349.1587.

**2-benzyl-1-phenylnaphtho[2,1-*b*]furan (4cc).<sup>1</sup>**

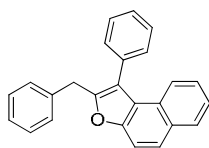

A white amorphous solid (136 mg, 81% yield).  $^1\text{H}$  NMR ( $\text{CDCl}_3$ , 300 MHz):  $\delta$  7.87 (d,  $J = 8.1$  Hz, 1H), 7.74 (d,  $J = 8.3$  Hz, 1H), 7.66 (d,  $J = 9.0$  Hz, 1H), 7.60 (d,  $J = 8.9$  Hz, 1H), 7.54–7.42 (m, 5H), 7.35 (t,  $J = 7.2$  Hz, 1H), 7.29–7.14 (m, 6H), 4.05 (s, 2H).  $^{13}\text{C}$  NMR ( $\text{CDCl}_3$ , 75 MHz):  $\delta$  152.7, 151.6, 138.1, 133.8, 130.7, 130.5, 128.8, 128.7, 128.52, 128.49, 128.0, 127.8, 126.5, 125.7, 124.5, 124.0, 123.1, 122.1, 119.9, 112.3, 32.6.

**2-benzyl-1-(naphthalen-1-yl)naphtho[2,1-*b*]furan (4cd).**

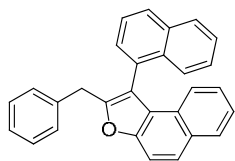

A white amorphous solid (140 mg, 73% yield).  $^1\text{H}$  NMR ( $\text{CDCl}_3$ , 300 MHz):  $\delta$  8.04–7.95 (m, 2H), 7.87 (d,  $J$  = 8.1 Hz, 1H), 7.75–7.57 (m, 5H), 7.50 (t,  $J$  = 7.1 Hz, 1H), 7.33–7.10 (m, 8H), 7.05–6.99 (m, 1H), 4.03 (d,  $J$  = 15.7 Hz, 1H), 3.92 (d,  $J$  = 15.7 Hz, 1H).  $^{13}\text{C}$  NMR ( $\text{CDCl}_3$ , 75 MHz):  $\delta$  153.5, 151.8, 137.8, 133.8, 133.1, 131.2, 130.6, 128.67, 128.63, 128.56, 128.43, 128.3, 127.9, 126.5, 126.4, 126.21, 126.17, 125.8, 125.7, 125.0, 124.0, 123.23, 123.16, 117.4, 112.3, 32.9. HRMS (ESI-TOF) calcd for  $\text{C}_{29}\text{H}_{21}\text{O}$  ( $\text{M}^+\text{H}$ ): 385.1587; found: 385.1581.

**2-benzyl-3-(4-methoxyphenyl)-5-methylbenzofuran (4da).**

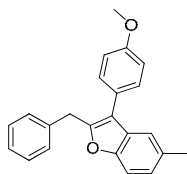

A white amorphous solid (118 mg, 72% yield).  $^1\text{H}$  NMR ( $\text{CDCl}_3$ , 300 MHz):  $\delta$  7.42 (d,  $J$  = 8.7 Hz, 2H), 7.36–7.18 (m, 7H), 7.07 (dd,  $J$  = 1.0 Hz, 8.3 Hz, 1H), 7.01 (d,  $J$  = 8.7 Hz, 2H), 4.17 (s, 2H), 3.86 (s, 3H), 2.42 (s, 3H).  $^{13}\text{C}$  NMR ( $\text{CDCl}_3$ , 150 MHz):  $\delta$  158.9, 152.7, 152.3, 138.1, 132.1, 130.2, 129.0, 128.6, 128.4, 126.5, 125.0, 124.9, 119.5, 117.6, 114.3, 55.3, 32.9, 21.3. HRMS (ESI-TOF) calcd for  $\text{C}_{23}\text{H}_{21}\text{O}_2$  ( $\text{M}^+\text{H}$ ): 329.1536; found: 329.1531.

**2-benzyl-5-methyl-3-(*p*-tolyl)benzofuran (4db).**

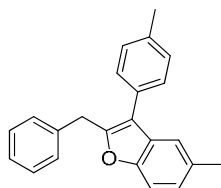

A white amorphous solid (117 mg, 75% yield).  $^1\text{H}$  NMR ( $\text{CDCl}_3$ , 300 MHz):  $\delta$  7.50–7.43 (m, 3H), 7.41–7.24 (m, 8H), 7.13 (d,  $J$  = 8.2 Hz, 1H), 4.24 (s, 2H), 2.48 (s, 6H).  $^{13}\text{C}$  NMR ( $\text{CDCl}_3$ , 75 MHz):  $\delta$  152.7, 152.4, 138.0, 136.9, 132.0, 129.6, 129.5, 128.9, 128.8, 128.5, 128.4, 126.5, 125.0, 119.6, 117.9, 110.6, 32.8, 21.3, 21.2. HRMS (ESI-TOF) calcd for  $\text{C}_{23}\text{H}_{21}\text{O}$  ( $\text{M}^+\text{H}$ ): 313.1587; found: 313.1587.

**2-benzyl-5-methyl-3-phenylbenzofuran (4dc).<sup>1</sup>**

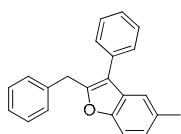

A white amorphous solid (111 mg, 74% yield).  $^1\text{H}$  NMR ( $\text{CDCl}_3$ , 300 MHz):  $\delta$  7.49 (d,  $J$  = 7.1 Hz, 2H), 7.43 (t,  $J$  = 7.5 Hz, 2H), 7.38–7.14 (m, 8H), 7.04 (d,  $J$  = 8.2 Hz, 1H), 4.15 (s, 2H), 2.38 (s, 3H).  $^{13}\text{C}$  NMR ( $\text{CDCl}_3$ ,

75 MHz):  $\delta$  152.7, 152.6, 137.9, 132.6, 132.1, 129.0, 128.8, 128.64, 128.55, 128.4, 127.2, 126.5, 125.1, 119.5, 118.0, 110.6, 32.8, 21.3.

**2-benzyl-4,6-dimethyl-3-(*p*-tolyl)benzofuran (4eb).**

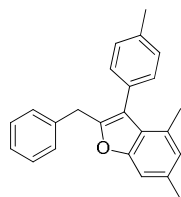

A white amorphous solid (115 mg, 70% yield).  $^1\text{H}$  NMR ( $\text{CDCl}_3$ , 300 MHz):  $\delta$  7.35–7.19 (m, 9H), 7.15 (s, 1H), 6.82 (s, 1H), 4.00 (s, 2H), 2.46 (s, 3H), 2.44 (s, 3H), 2.16 (s, 3H).  $^{13}\text{C}$  NMR ( $\text{CDCl}_3$ , 75 MHz):  $\delta$  154.6, 152.2, 138.3, 137.0, 133.7, 130.9, 130.6, 128.8, 128.57, 128.47, 128.41, 126.3, 125.5, 125.0, 118.6, 109.0, 32.5, 21.4, 21.3, 19.3. HRMS (ESI-TOF) calcd for  $\text{C}_{24}\text{H}_{23}\text{O}$  ( $\text{M}^+\text{H}$ ): 327.1743; found: 327.1741.

**2-benzyl-4,6-dimethyl-3-phenylbenzofuran (4ec).**

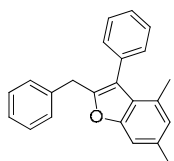

A white amorphous solid (110 mg, 70% yield).  $^1\text{H}$  NMR ( $\text{CDCl}_3$ , 300 MHz):  $\delta$  7.42–7.30 (m, 5H), 7.26–7.12 (m, 5H), 7.09 (s, 1H), 6.76 (s, 1H), 3.93 (s, 2H), 2.37 (s, 3H), 2.07 (s, 3H).  $^{13}\text{C}$  NMR ( $\text{CDCl}_3$ , 75 MHz):  $\delta$  154.6, 152.2, 138.1, 133.9, 133.7, 130.8, 130.7, 128.45, 128.42, 128.0, 127.3, 126.3, 125.6, 124.9, 118.7, 109.0, 32.5, 21.4, 19.3. HRMS (ESI-TOF) calcd for  $\text{C}_{23}\text{H}_{21}\text{O}$  ( $\text{M}^+\text{H}$ ): 313.1587; found: 313.1585.

**2-benzyl-3-(4-bromophenyl)-4,6-dimethylbenzofuran (4ee).**

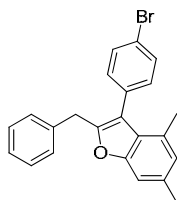

A white amorphous solid (117 mg, 60% yield).  $^1\text{H}$  NMR ( $\text{CDCl}_3$ , 300 MHz):  $\delta$  7.60 (d,  $J$  = 8.1 Hz, 2H), 7.36–7.19 (m, 7H), 7.17 (s, 1H), 6.84 (s, 1H), 3.99 (s, 2H), 2.46 (s, 3H), 2.14 (s, 3H).  $^{13}\text{C}$  NMR ( $\text{CDCl}_3$ , 75 MHz):  $\delta$  154.6, 152.4, 137.9, 134.0, 132.9, 132.3, 131.2, 130.6, 128.5, 128.4, 126.5, 125.7, 124.6, 121.6, 117.5, 109.1, 32.5, 21.4, 19.4. HRMS (EI-TOF) calcd for  $\text{C}_{23}\text{H}_{19}\text{BrO}$  ( $\text{M}^+$ ): 390.0619; found: 390.0622.

**2-benzyl-3-(4-methoxyphenyl)-5-phenylbenzofuran (4fa).**

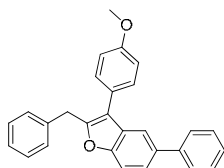

A white amorphous solid (151 mg, 77% yield).  $^1\text{H}$  NMR ( $\text{CDCl}_3$ , 300 MHz):  $\delta$  7.74 (s, 1H), 7.59 (d,  $J = 7.4$  Hz, 2H), 7.51–7.38 (m, 6H), 7.35–7.20 (m, 6H), 7.03 (d,  $J = 8.6$  Hz, 2H), 4.21 (s, 2H), 3.86 (s, 3H).  $^{13}\text{C}$  NMR ( $\text{CD}_3\text{OD}$ , 75 MHz):  $\delta$  158.9, 153.9, 152.9, 141.8, 137.9, 136.4, 130.2, 129.4, 128.66, 128.62, 128.4, 127.5, 126.8, 126.6, 124.5, 123.5, 118.3, 118.1, 114.4, 111.2, 55.3, 32.9. HRMS (ESI-TOF) calcd for  $\text{C}_{28}\text{H}_{23}\text{O}_2$  ( $\text{M}^++\text{H}$ ): 391.1693; found: 391.1676.

**2-benzyl-5-phenyl-3-(*p*-tolyl)benzofuran (4fb).**

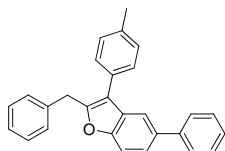

A white amorphous solid (132 mg, 70% yield).  $^1\text{H}$  NMR ( $\text{CDCl}_3$ , 300 MHz):  $\delta$  7.82 (s, 1H), 7.64 (d,  $J = 7.4$  Hz, 2H), 7.56–7.41 (m, 6H), 7.39–7.22 (m, 8H), 4.26 (s, 2H), 2.47 (s, 3H).  $^{13}\text{C}$  NMR ( $\text{CDCl}_3$ , 75 MHz):  $\delta$  153.9, 153.1, 141.8, 137.9, 137.1, 136.4, 129.6, 129.3, 128.9, 128.65, 128.61, 128.5, 127.44, 127.40, 126.8, 126.6, 123.5, 118.36, 118.32, 111.2, 32.9, 21.3. HRMS (ESI-TOF) calcd for  $\text{C}_{28}\text{H}_{23}\text{O}$  ( $\text{M}^++\text{H}$ ): 375.1743; found: 375.1741.

**2-benzyl-3,5-diphenylbenzofuran (4fc).<sup>1</sup>**

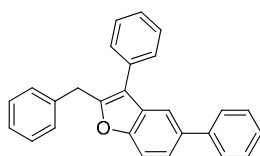

A white amorphous solid (122 mg, 68% yield).  $^1\text{H}$  NMR ( $\text{CDCl}_3$ , 300 MHz):  $\delta$  7.76 (s, 1H), 7.50–7.08 (m, 17H), 4.22 (s, 2H).  $^{13}\text{C}$  NMR ( $\text{CDCl}_3$ , 75 MHz):  $\delta$  153.9, 153.3, 141.7, 137.8, 136.5, 132.3, 129.14, 129.08, 128.9, 128.67, 128.63, 128.5, 127.5, 127.4, 126.8, 126.6, 123.6, 118.5, 118.3, 111.2, 32.9.

**2-benzyl-5-chloro-3-(4-methoxyphenyl)benzofuran (4ga).**

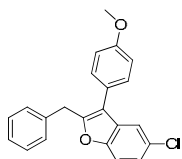

A white amorphous solid (78 mg, 45% yield).  $^1\text{H}$  NMR ( $\text{CDCl}_3$ , 300 MHz):  $\delta$  7.51 (d,  $J = 1.9$  Hz, 1H), 7.42–7.18 (m, 9H), 7.02 (d,  $J = 8.7$  Hz, 2H), 4.17 (s, 2H), 3.86 (s, 3H).  $^{13}\text{C}$  NMR ( $\text{CDCl}_3$ , 75 MHz):  $\delta$  159.1, 153.7, 152.6, 137.6, 130.3, 130.1, 128.6, 128.4, 128.3, 126.6, 124.0, 123.8, 119.4, 117.6, 114.4, 112.0, 55.3, 32.8. HRMS (EI-TOF) calcd for  $\text{C}_{22}\text{H}_{17}\text{ClO}_2$  ( $\text{M}^+$ ): 348.0917; found: 348.0913.

**2-benzyl-5-chloro-3-phenylbenzofuran (4gc).<sup>1</sup>**

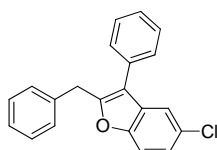



A white amorphous solid (87 mg, 55% yield).  $^1\text{H}$  NMR ( $\text{CDCl}_3$ , 300 MHz):  $\delta$  7.62 (d,  $J = 1.7$  Hz, 1H), 7.55 (d,  $J = 4.4$  Hz, 4H), 7.49–7.24 (m, 8H), 4.26 (s, 2H).  $^{13}\text{C}$  NMR ( $\text{CDCl}_3$ , 75 MHz):  $\delta$  154.0, 152.6, 137.4, 131.7, 130.3, 128.94, 128.91, 128.6, 128.42, 128.37, 127.6, 126.7, 124.1, 119.4, 118.0, 112.0, 32.8.

***N*-(2-benzyl-3-(4-methoxyphenyl)benzofuran-5-yl)acetamide (4ha).**

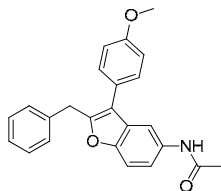

A brownish amorphous solid (90 mg, 49% yield).  $^1\text{H}$  NMR ( $\text{CDCl}_3$ , 600 MHz):  $\delta$  7.73 (d,  $J = 2.0$  Hz, 1H), 7.40 (d,  $J = 8.7$  Hz, 2H), 7.35 (d,  $J = 8.6$  Hz, 2H), 7.32–7.26 (m, 3H), 7.25–7.21 (m, 3H), 6.99 (d,  $J = 8.6$  Hz, 2H), 4.17 (s, 2H), 3.85 (s, 3H), 2.15 (s, 3H).  $^{13}\text{C}$  NMR ( $\text{CDCl}_3$ , 150 MHz):  $\delta$  168.3, 159.0, 153.2, 151.4, 137.9, 133.0, 130.1, 129.3, 128.6, 128.5, 126.6, 124.4, 118.1, 117.5, 114.4, 112.0, 111.1, 55.3, 32.9, 24.3. HRMS (ESI-TOF) calcd for  $\text{C}_{24}\text{H}_{22}\text{NO}_3$  ( $\text{M}^+\text{H}$ ): 372.1594; found: 372.1592.

***N*-(2-benzyl-3-phenylbenzofuran-5-yl)acetamide (4hc).**

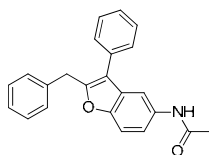

A brownish amorphous solid (86 mg, 50% yield).  $^1\text{H}$  NMR ( $\text{CDCl}_3$ , 600 MHz):  $\delta$  7.73 (d,  $J = 1.9$  Hz, 1H), 7.47 (d,  $J = 7.0$  Hz, 2H), 7.44 (t,  $J = 7.6$  Hz, 2H), 7.39–7.33 (m, 3H), 7.31–7.27 (m, 3H), 7.25–7.21 (m, 3H), 4.18 (s, 2H), 2.13 (s, 3H).  $^{13}\text{C}$  NMR ( $\text{CDCl}_3$ , 150 MHz):  $\delta$  168.3, 153.6, 151.5, 137.8, 133.1, 132.2, 129.1, 129.0, 128.9, 128.6, 128.5, 127.4, 126.6, 118.5, 117.7, 112.0, 111.1, 32.9, 24.3. HRMS (ESI-TOF) calcd for  $\text{C}_{23}\text{H}_{20}\text{NO}_2$  ( $\text{M}^+\text{H}$ ): 342.1489; found: 342.1488.

***tert*-butyl (2-benzyl-3-(4-methoxyphenyl)benzofuran-5-yl)carbamate (4ia).**

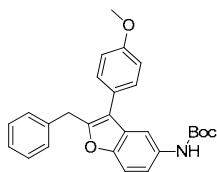

A light yellow amorphous solid (112 mg, 52% yield).  $^1\text{H}$  NMR ( $\text{CDCl}_3$ , 300 MHz):  $\delta$  7.61 (s, 1H), 7.43 (dt,  $J = 8.8$  Hz, 2.1 Hz, 2H), 7.38–7.17 (m, 7H), 7.02 (dt,  $J = 8.8$  Hz, 2.5 Hz, 2H), 6.52 (s, 1H), 4.18 (s, 2H), 3.88 (s, 3H), 1.53 (s, 9H).  $^{13}\text{C}$  NMR ( $\text{CDCl}_3$ , 75 MHz):  $\delta$  158.9, 153.2, 153.0, 150.8, 137.9, 133.5, 130.1, 129.3, 128.6, 128.4, 126.5, 124.5, 118.0, 116.3, 114.3, 111.0, 110.2, 80.2, 55.3, 32.9, 28.4. HRMS (ESI-FTMS) calcd for  $\text{C}_{27}\text{H}_{27}\text{NNaO}_4$  ( $\text{M}^+\text{Na}$ ): 452.1832; found: 452.1840.

***tert*-butyl (3-(4-methoxyphenyl)-2-pentylbenzofuran-5-yl)carbamate (4if).**

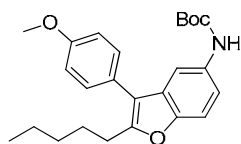

Light yellow oil (114 mg, 56% yield).  $^1\text{H}$  NMR ( $\text{CDCl}_3$ , 300 MHz):  $\delta$  7.56 (s, 1H), 7.37 (t,  $J = 8.4$  Hz, 3H), 7.19 (d,  $J = 8.2$  Hz, 1H), 7.01 (d,  $J = 8.6$  Hz, 2H), 3.86 (s, 3H), 2.80 (t,  $J = 7.6$  Hz, 4H), 1.82–1.68 (m, 2H), 1.37–1.27 (m, 4H), 0.89 (t,  $J = 6.7$  Hz, 3H).  $^{13}\text{C}$  NMR ( $\text{CDCl}_3$ , 75 MHz):  $\delta$  158.8, 155.8, 153.2, 150.4, 133.4, 130.1, 129.5, 124.9, 116.4, 115.9, 114.2, 110.7, 109.9, 80.1, 55.2, 31.4, 28.3, 28.0, 26.7, 22.3, 13.9. HRMS (ESI-TOF) calcd for  $\text{C}_{25}\text{H}_{31}\text{NNaO}_4$  ( $\text{M}^+\text{Na}$ ): 432.2145; found: 432.2145.

#### 1-(4-methoxyphenyl)-2-pentyl-naphtho[2,1-*b*]furan (4cf).

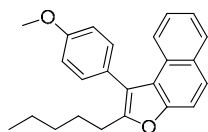

Light yellow oil (87 mg, 51% yield).  $^1\text{H}$  NMR ( $\text{CDCl}_3$ , 300 MHz):  $\delta$  7.87 (d,  $J = 8.0$  Hz, 1H), 7.74 (d,  $J = 8.2$  Hz, 1H), 7.65 (d,  $J = 9.0$  Hz, 1H), 7.61 (d,  $J = 8.9$  Hz, 1H), 7.40–7.10 (m, 4H), 7.02 (d,  $J = 8.5$  Hz, 2H), 3.88 (s, 3H), 2.69 (t,  $J = 7.5$  Hz, 4H), 1.77–1.65 (m, 2H), 1.35–1.20 (m, 4H), 0.84 (t,  $J = 6.5$  Hz, 3H).  $^{13}\text{C}$  NMR ( $\text{CDCl}_3$ , 75 MHz):  $\delta$  159.0, 155.3, 151.1, 131.6, 130.7, 128.7, 128.0, 126.2, 125.5, 124.3, 123.9, 123.1, 122.6, 118.3, 114.0, 112.1, 55.2, 31.3, 28.3, 26.3, 22.3, 14.0. HRMS (ESI-TOF) calcd for  $\text{C}_{24}\text{H}_{25}\text{O}_2$  ( $\text{M}^+\text{H}$ ): 345.1849; found: 345.1844.

## Reference

1. F.-Q. Yuan and F.-S. Han, *Adv. Synth. Catal.*, 2013, **355**, 537–547.
2. J. Hu, L. Liu, X. Wang, Y. Hu, S. Yang, Y. Liang, *Green Sustain. Chem.*, 2011, **1**, 165–169.

## NMR and MS spectra

### 2-benzyl-5-(*tert*-butyl)-3-(4-methoxyphenyl)benzofuran (4aa).

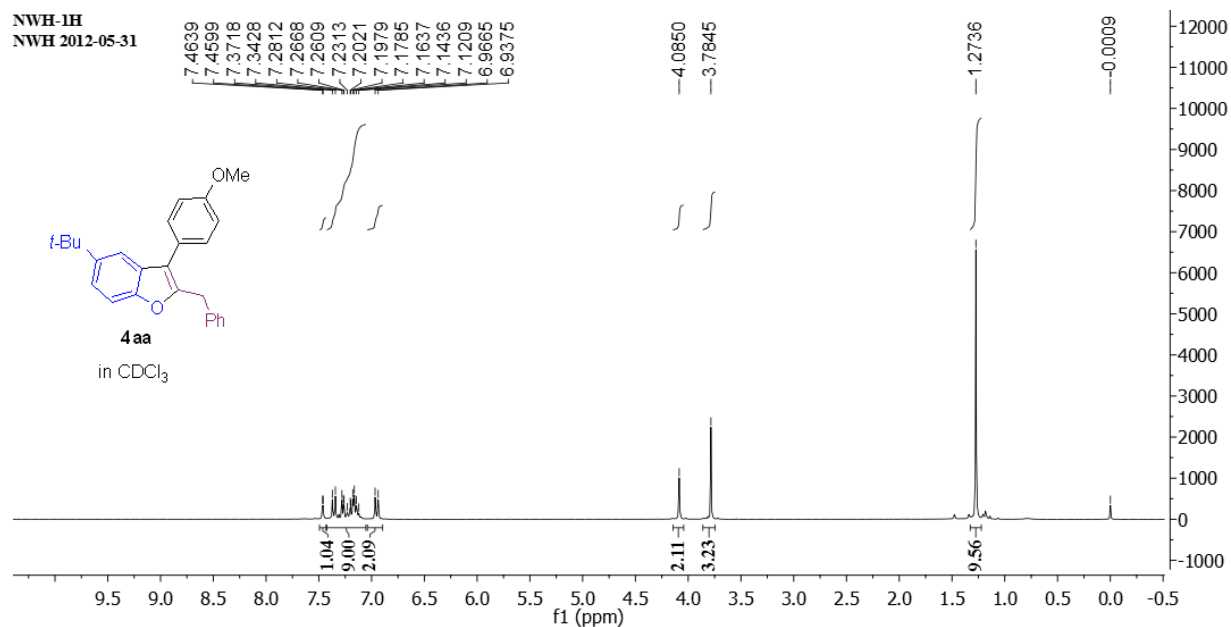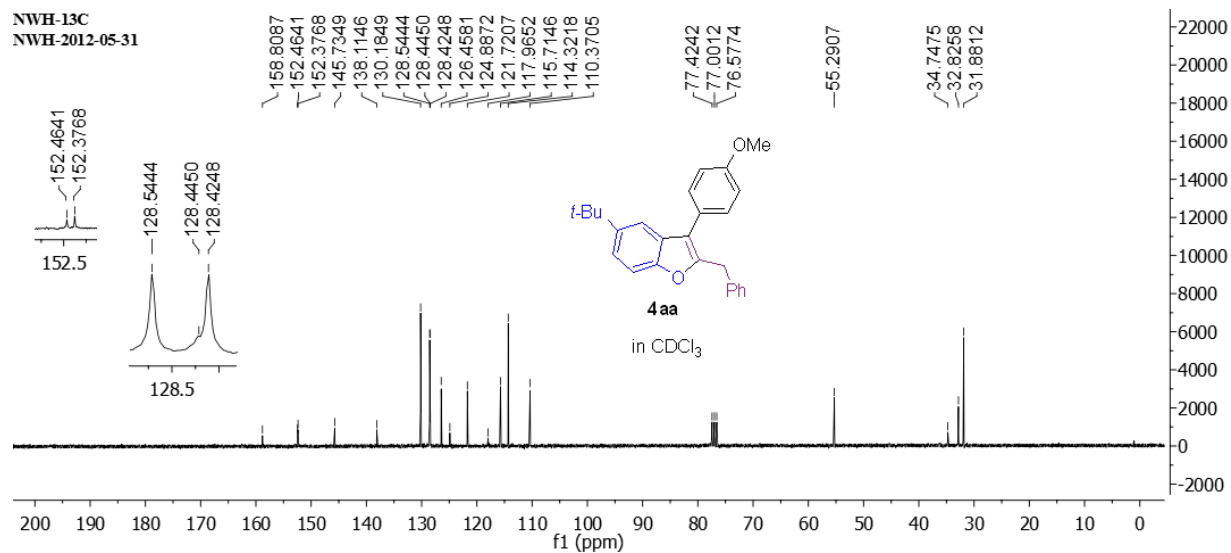

Shanghai Mass Spectrometry Center  
 Shanghai Institute of Organic Chemistry  
 Chinese Academy of Sciences  
 High Resolution MS Data Report

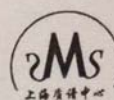

Instrument

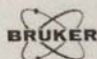

Bruker Daltonics, Inc. APEXIII 7.0 TESLA FTMS

Card Serial Number E140742  
 Analysis Name D:\Data\zj\2014\20140513\_000012.d  
 Sample Name 2009146-10-24-63-4aa  
 Acquisition Date 5/11/2014 1:53:10 PM  
 Operator: zj  
 Ionization Mode ESI-Positive  
 Ion Mass (Measured) 393.1814

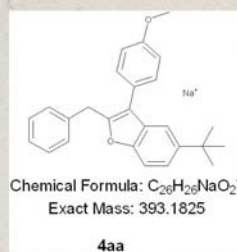

| Sum Formula            | Sigma | m/z      | Err [ppm] | Mean Err [ppm] | Err [mDa] | rdB   | N Rule | e <sup>-</sup> |
|------------------------|-------|----------|-----------|----------------|-----------|-------|--------|----------------|
| C 23 H 25 N 2 O 4      | 0.152 | 393.1809 | -1.29     | -1.29          | -0.51     | 12.50 | ok     | even           |
| C 24 H 24 N 3 Na 1 O 1 | 0.160 | 393.1812 | -0.59     | -0.59          | -0.23     | 14.00 | ok     | odd            |
| C 26 H 26 Na 1 O 2     | 0.166 | 393.1825 | 2.83      | 2.83           | 1.11      | 13.50 | ok     | even           |

## 2-benzyl-5-(*tert*-butyl)-3-(*p*-tolyl)benzofuran (4ab).

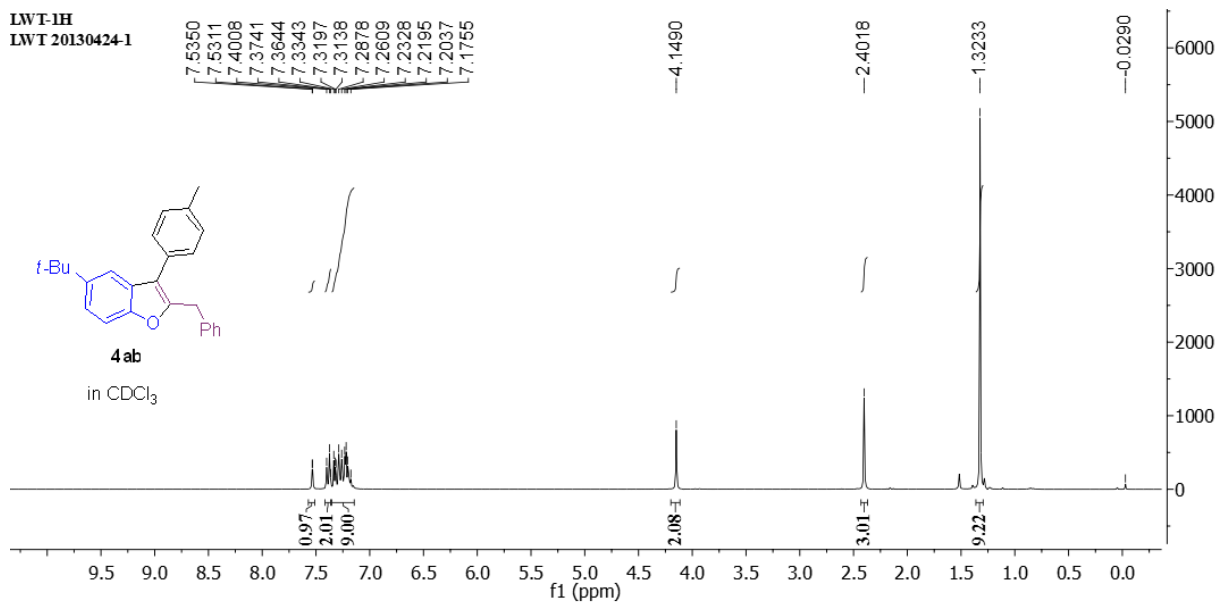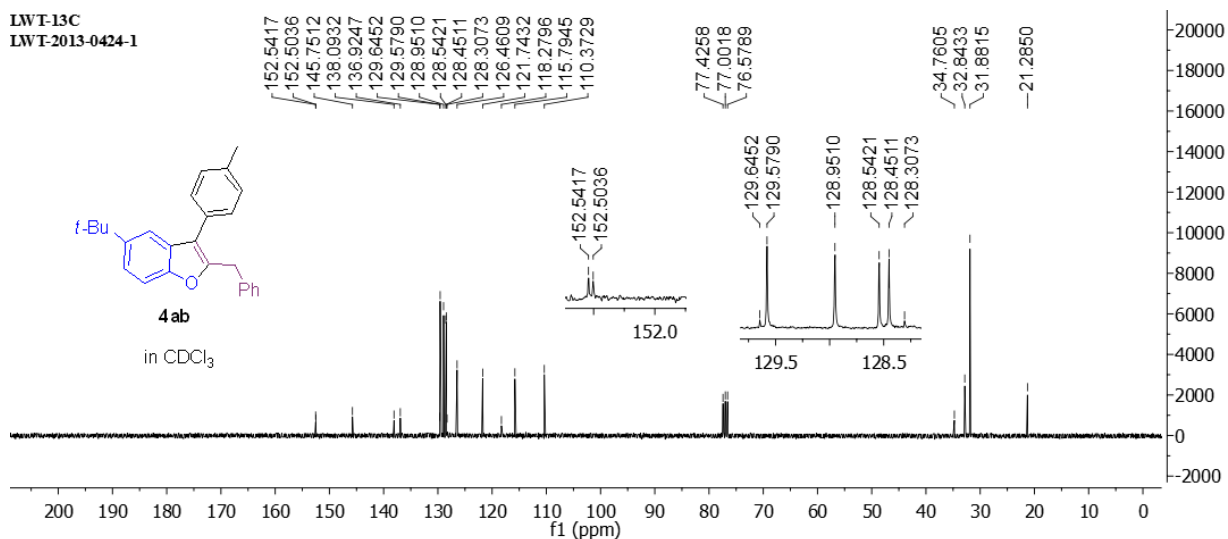

| Sample Name   | LWT-3           | Position    | P1-A3      | Instrument Name | Instrument 1 | User Name              |                       |
|---------------|-----------------|-------------|------------|-----------------|--------------|------------------------|-----------------------|
| Inj Vol       | 10              | InjPosition |            | SampleType      | Sample       | IRM Calibration Status | Success               |
| Data Filename | WorklistData3.d | ACQ Method  | YLF-AMPK.m | Comment         |              | Acquired Time          | 10/10/2013 9:56:34 AM |

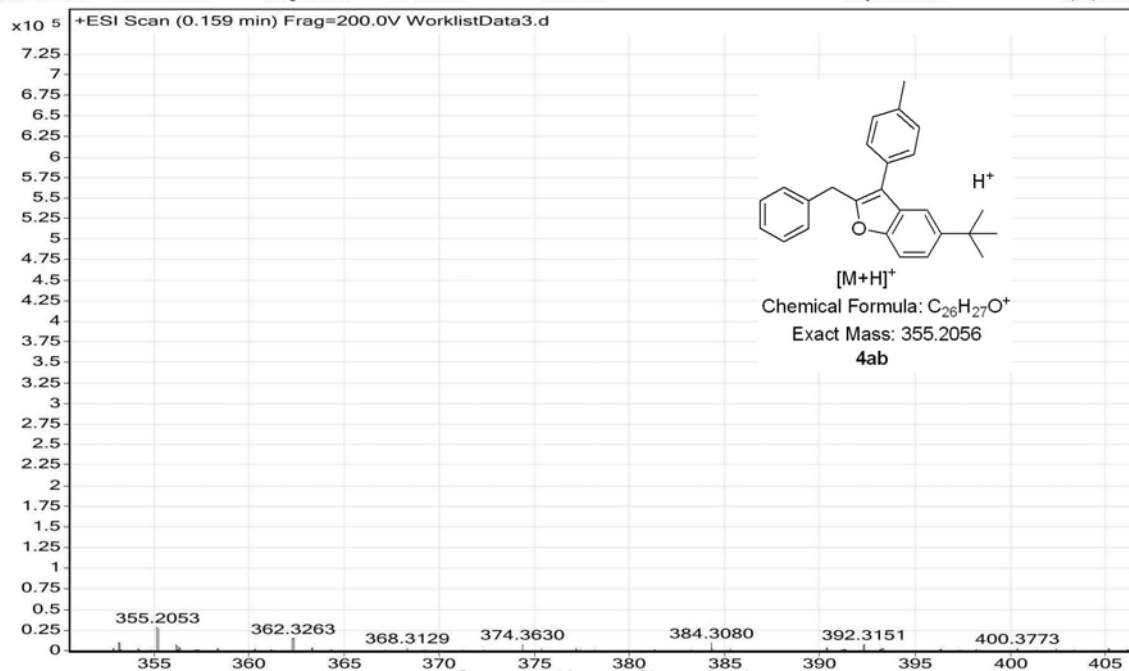

## 2-benzyl-5-(*tert*-butyl)-3-phenylbenzofuran (4ac)

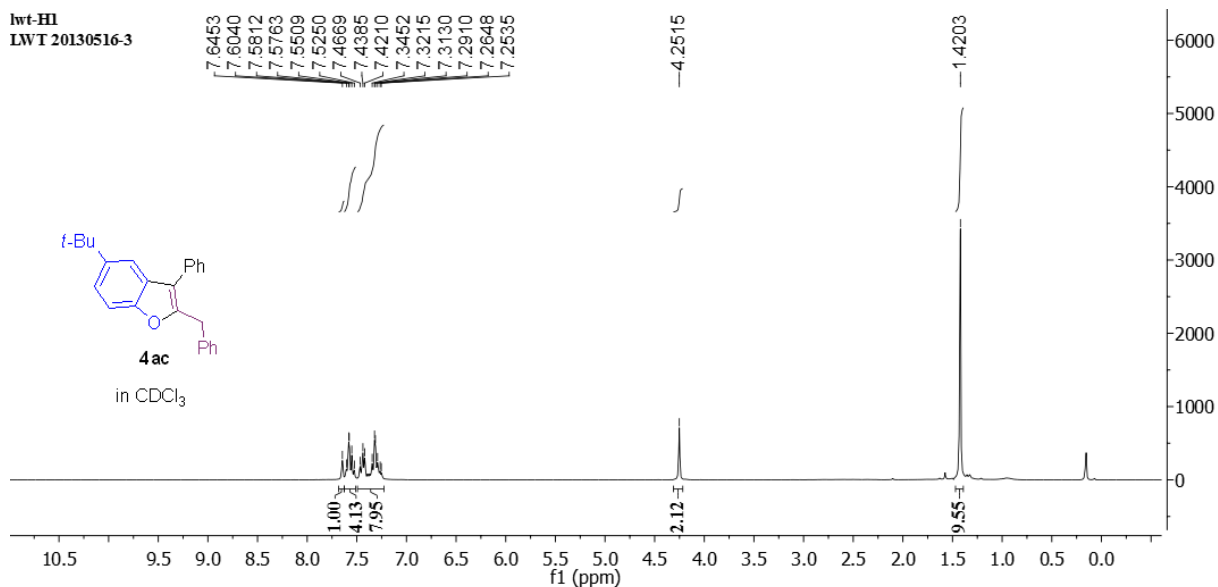

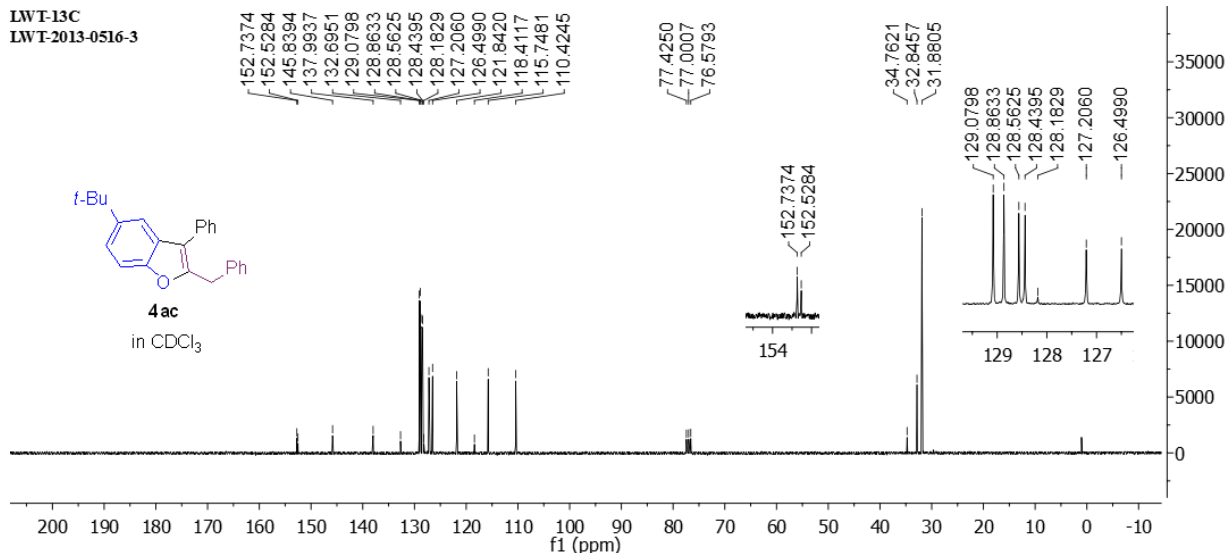

## 2-benzyl-5-(*tert*-butyl)-3-(naphthalen-1-yl)benzofuran (4ad)

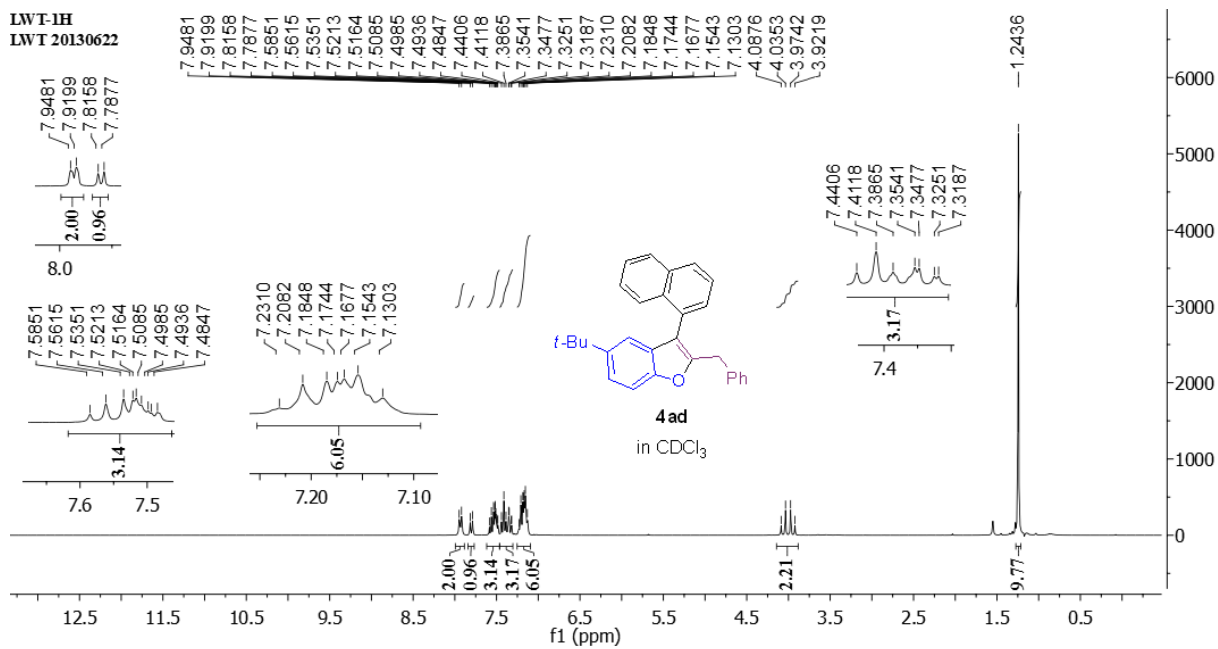

LWT-13C  
LWT-2013-0622

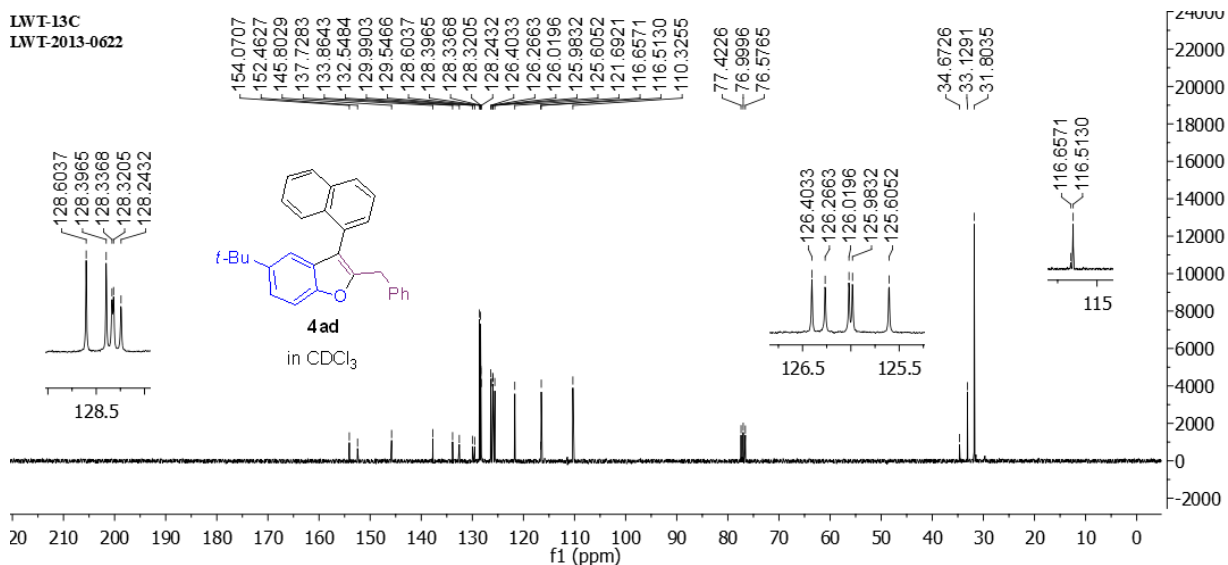

| Sample Name   | LWT-1           | Position    | PI-A1      | Instrument Name | Instrument 1 | User Name              |                       |
|---------------|-----------------|-------------|------------|-----------------|--------------|------------------------|-----------------------|
| Inj Vol       | 10              | InjPosition |            | SampleType      | Sample       | IRM Calibration Status | Success               |
| Data Filename | WorklistData1.d | ACQ Method  | YLF-AMPK.m | Comment         |              | Acquired Time          | 10/10/2013 9:51:41 AM |

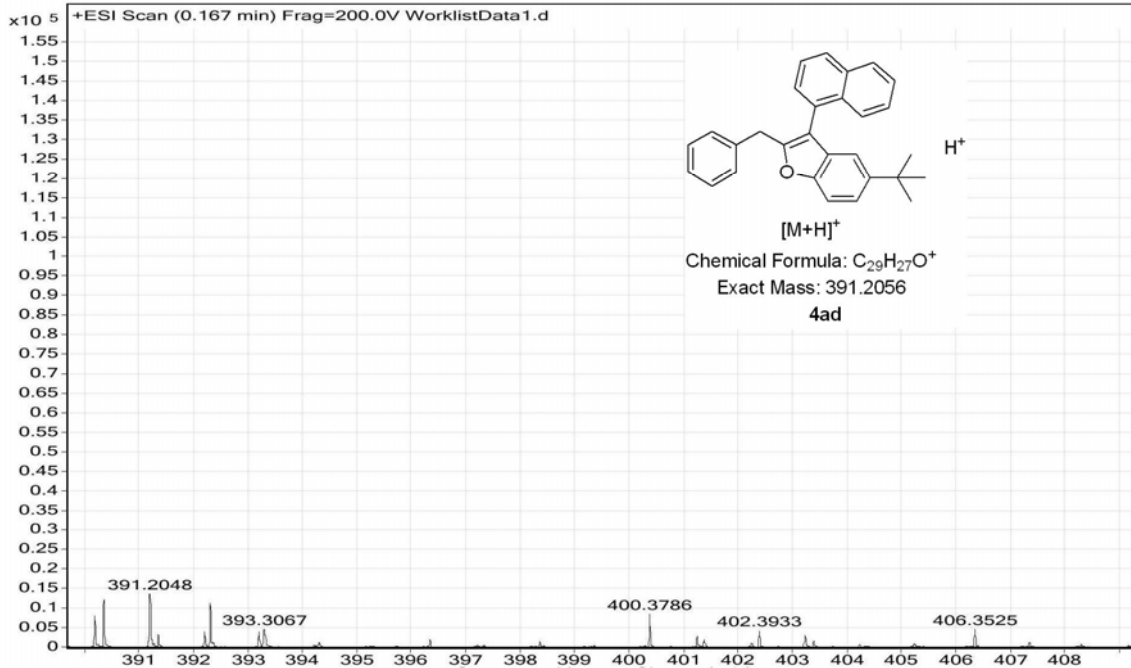



## 2-benzyl-3-(4-bromophenyl)-5-(*tert*-butyl)benzofuran (4ae)

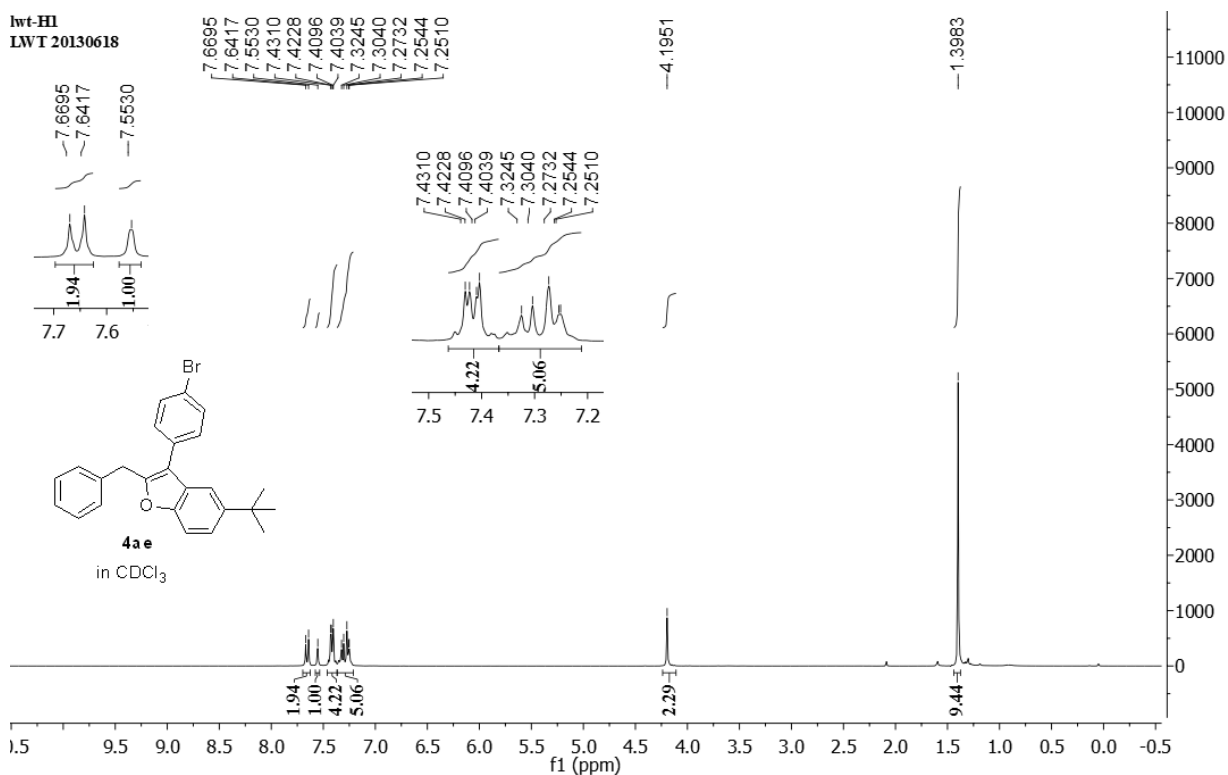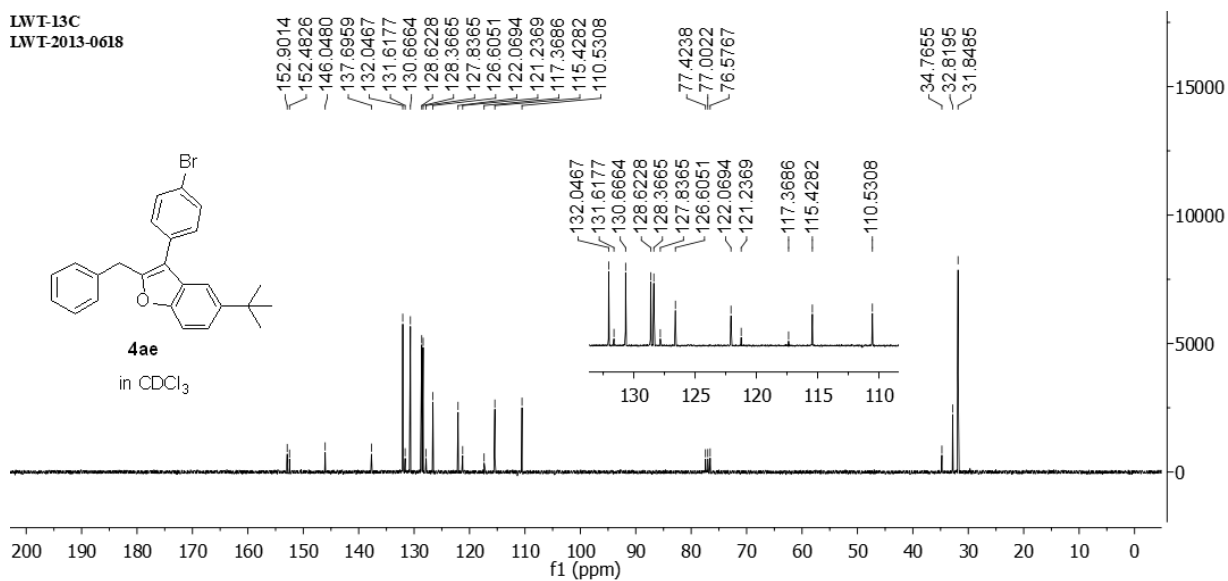

## 2-benzyl-5-methoxy-3-(4-methoxyphenyl)benzofuran (4ba)

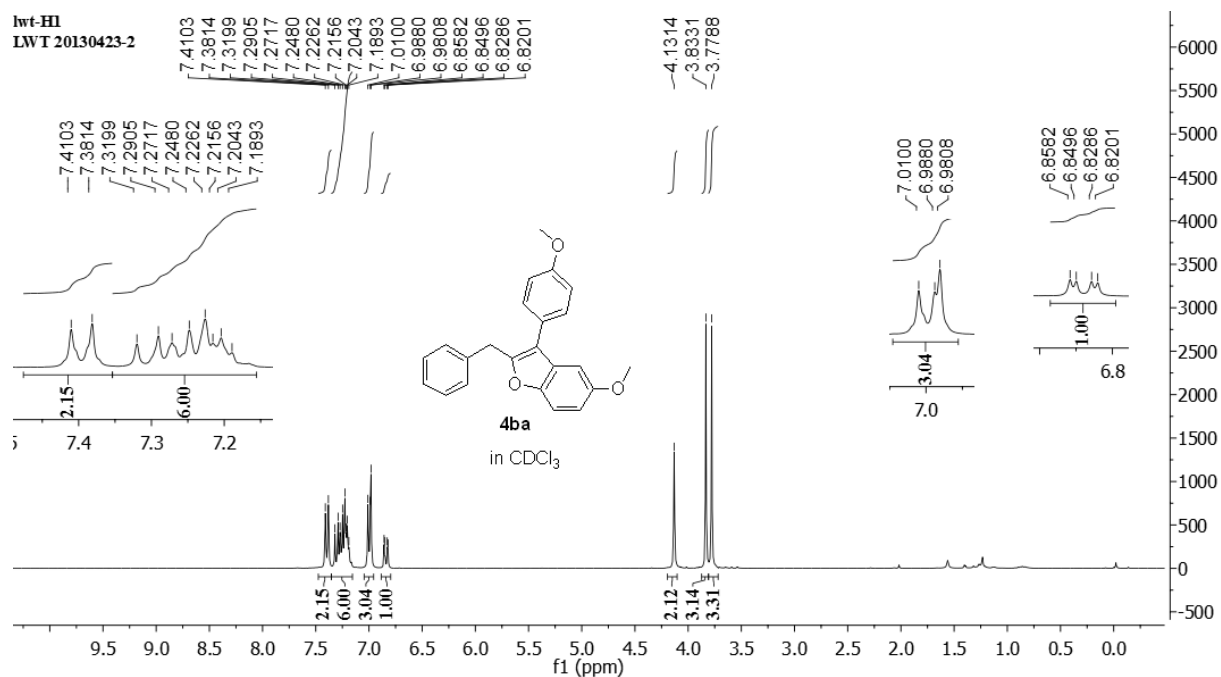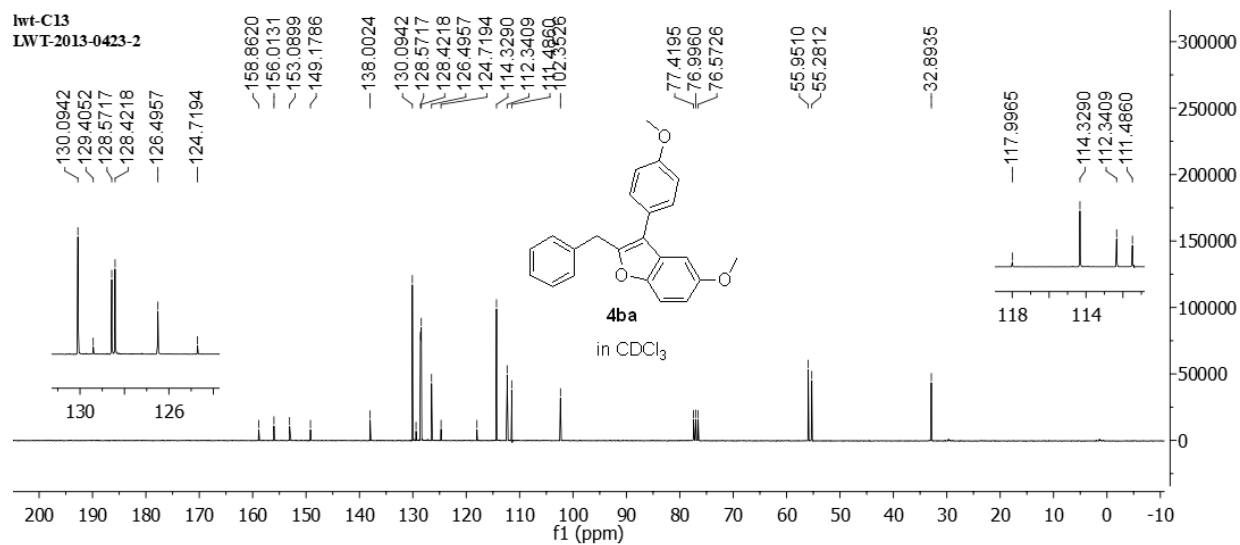

|               |                 |             |            |                 |              |                        |                       |
|---------------|-----------------|-------------|------------|-----------------|--------------|------------------------|-----------------------|
| Sample Name   | LWT-2           | Position    | P1-A2      | Instrument Name | Instrument 1 | User Name              |                       |
| Inj Vol       | 10              | InjPosition |            | SampleType      | Sample       | IRM Calibration Status | Success               |
| Data Filename | WorklistData2.d | ACQ Method  | YLF-AMPK.m | Comment         |              | Acquired Time          | 10/10/2013 9:54:08 AM |

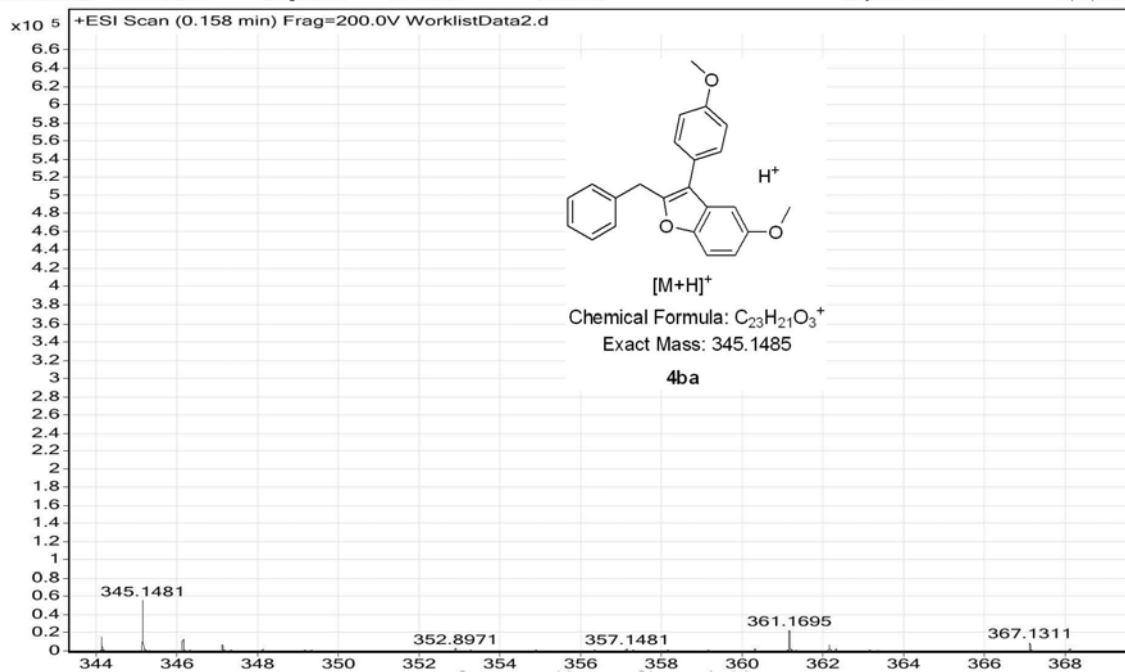

## 2-benzyl-5-methoxy-3-(*p*-tolyl)benzofuran (4bb)

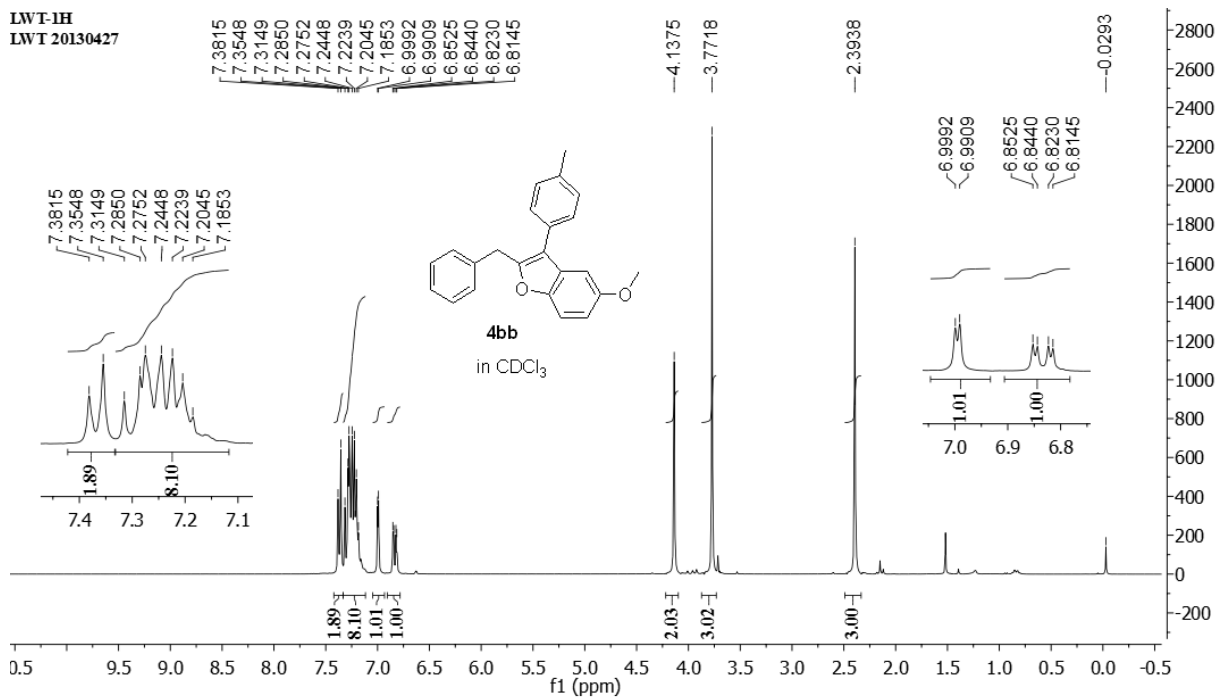

LWT-13C  
LWT-2013-0427

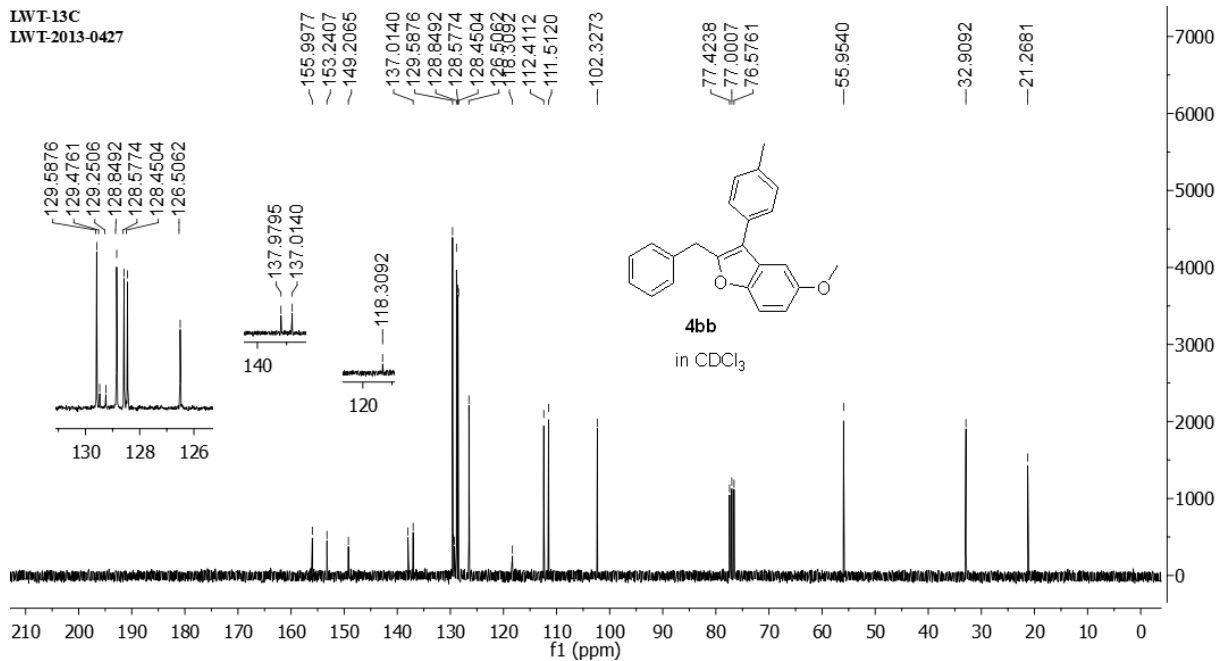

| Sample Name     | Position    | Instrument Name | User Name              |
|-----------------|-------------|-----------------|------------------------|
| LWT-5           | PI-A5       | Instrument 1    |                        |
| Inj Vol         | InjPosition | SampleType      | IRM Calibration Status |
| 10              |             | Sample          | Success                |
| Data Filename   | ACQ Method  | Comment         | Acquired Time          |
| WorklistData5.d | YLF-AMPK.m  |                 | 10/10/2013 10:01:26 AM |

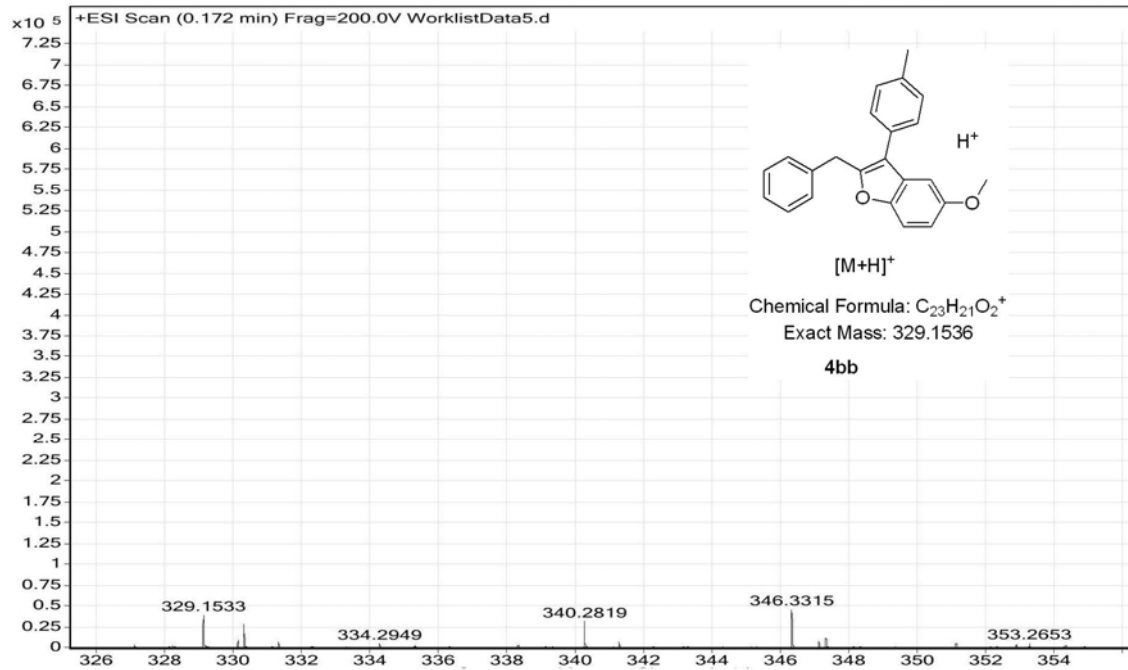

## 2-benzyl-5-methoxy-3-phenylbenzofuran (4bc)

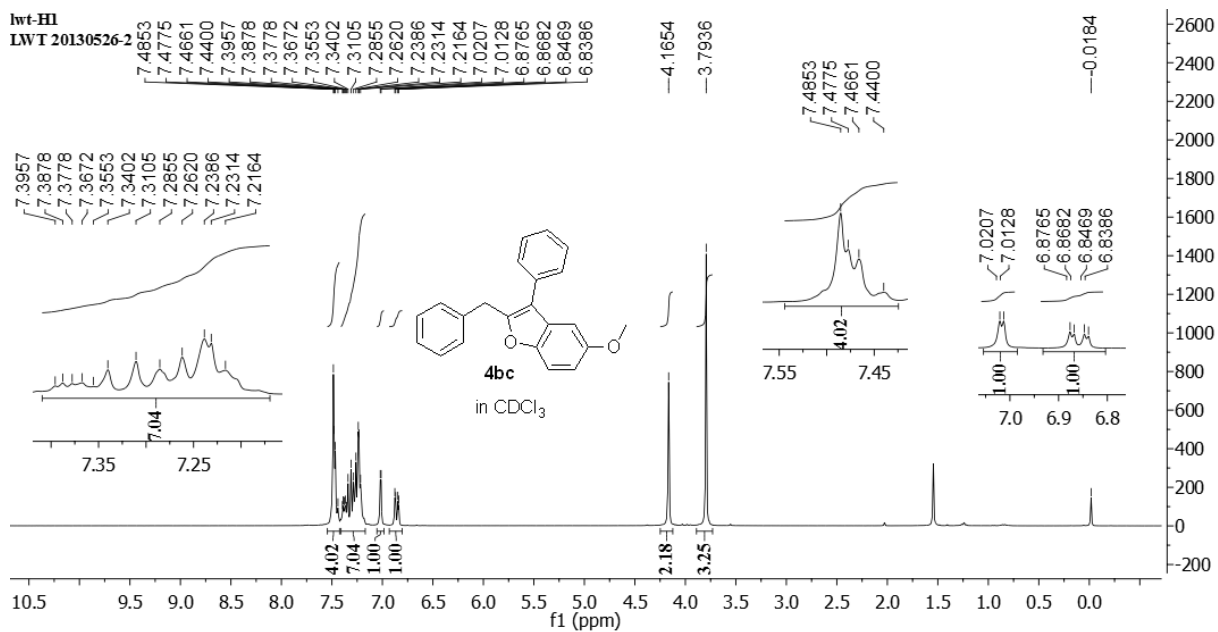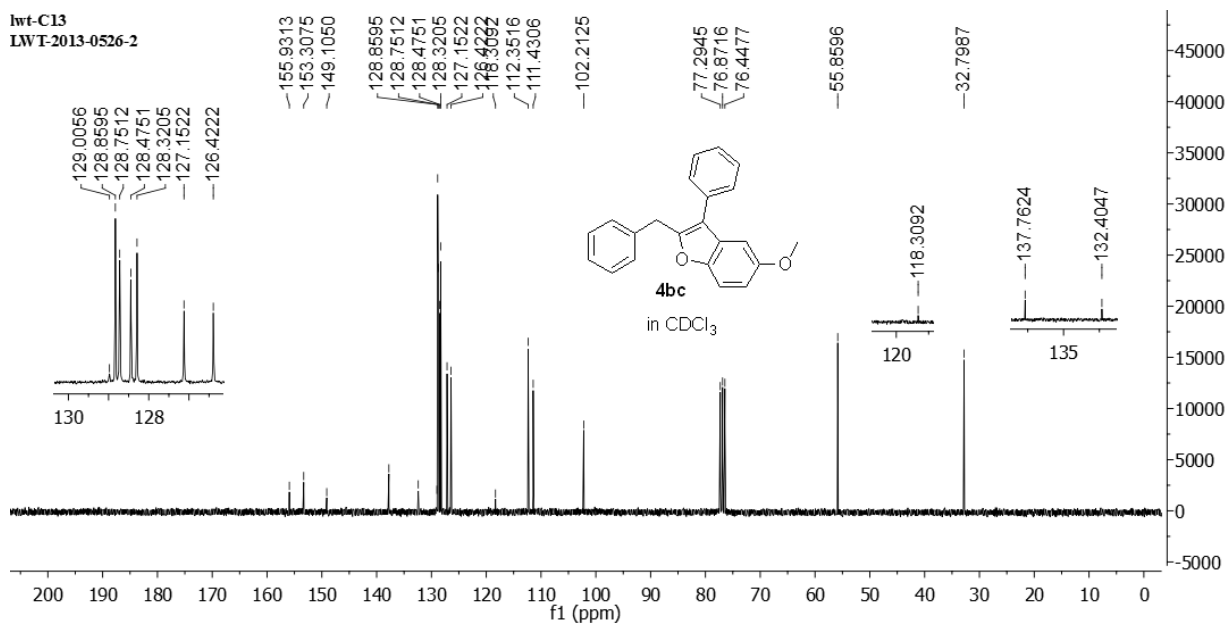

# 2-benzyl-1-(4-methoxyphenyl)naphtho[2,1-b]furan (4ca)

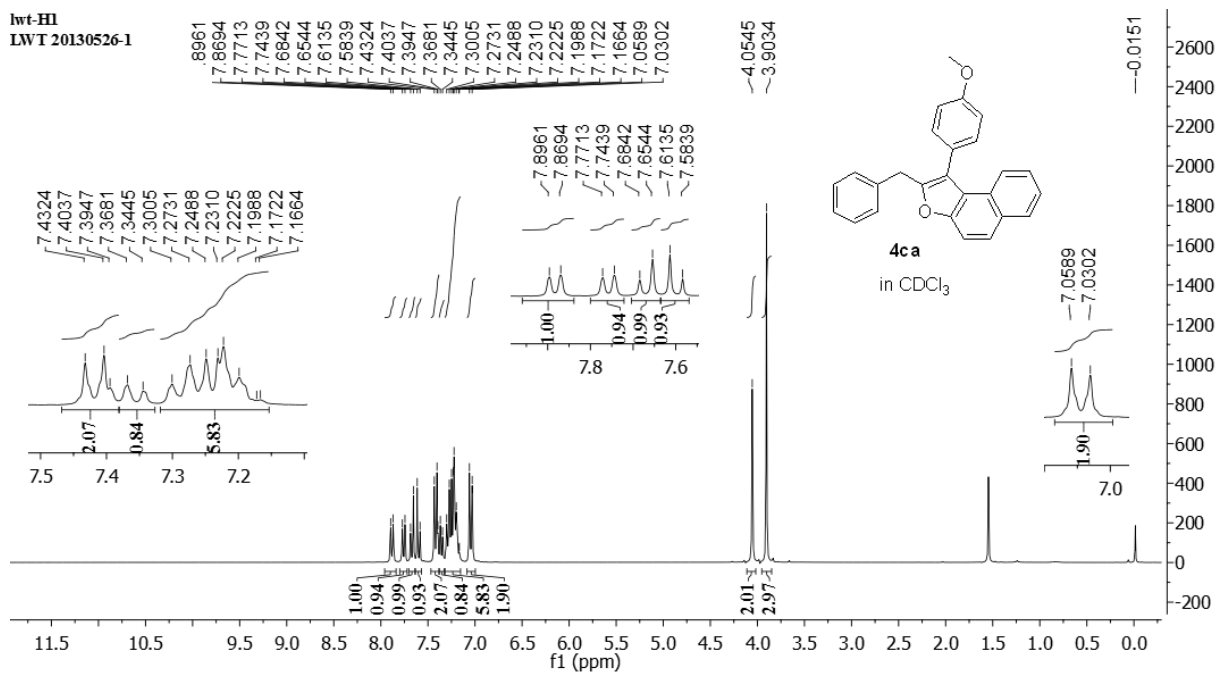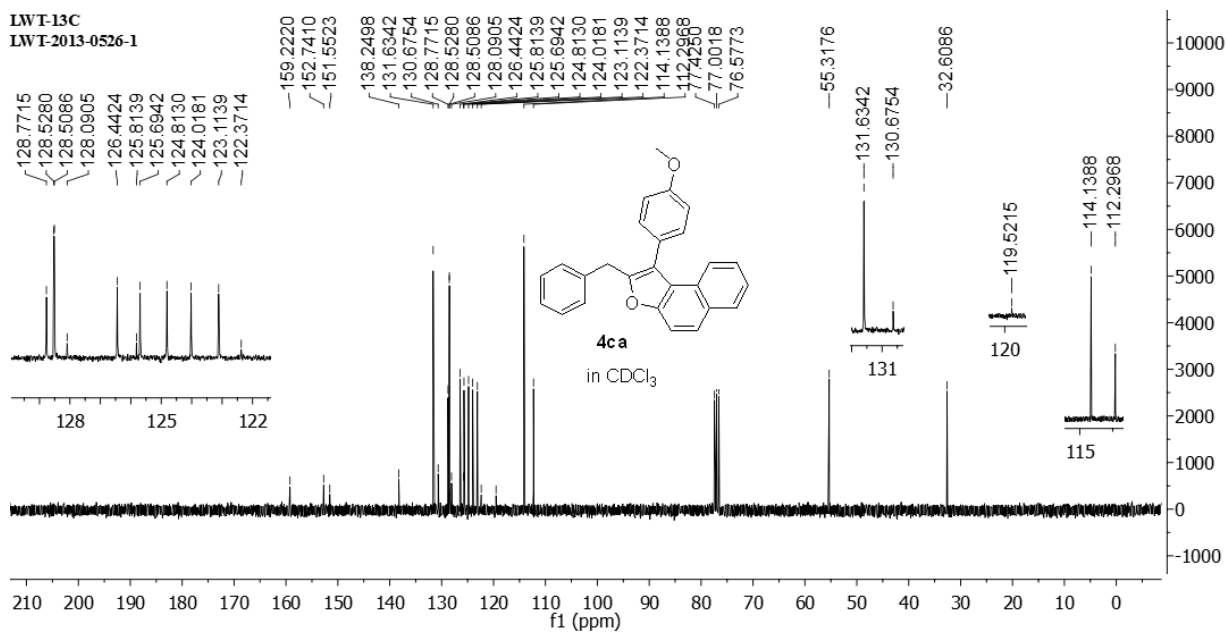

| Sample Name   | LWT-12           | Position    | P1-B3      | Instrument Name | Instrument 1 | User Name              |                        |
|---------------|------------------|-------------|------------|-----------------|--------------|------------------------|------------------------|
| Inj Vol       | 10               | InjPosition |            | SampleType      | Sample       | IRM Calibration Status | Success                |
| Data Filename | WorklistData12.d | ACQ Method  | YLF-AMPK.m | Comment         |              | Acquired Time          | 10/10/2013 10:18:25 AM |

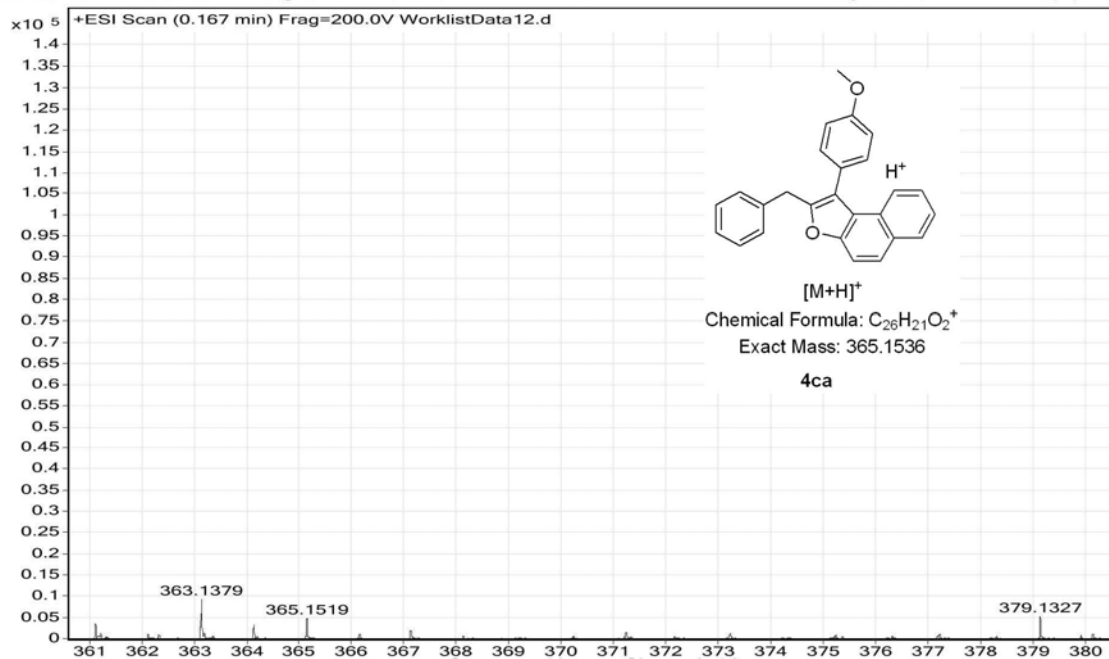

## 2-benzyl-1-(p-tolyl)naphtho[2,1-b]furan (4cb)

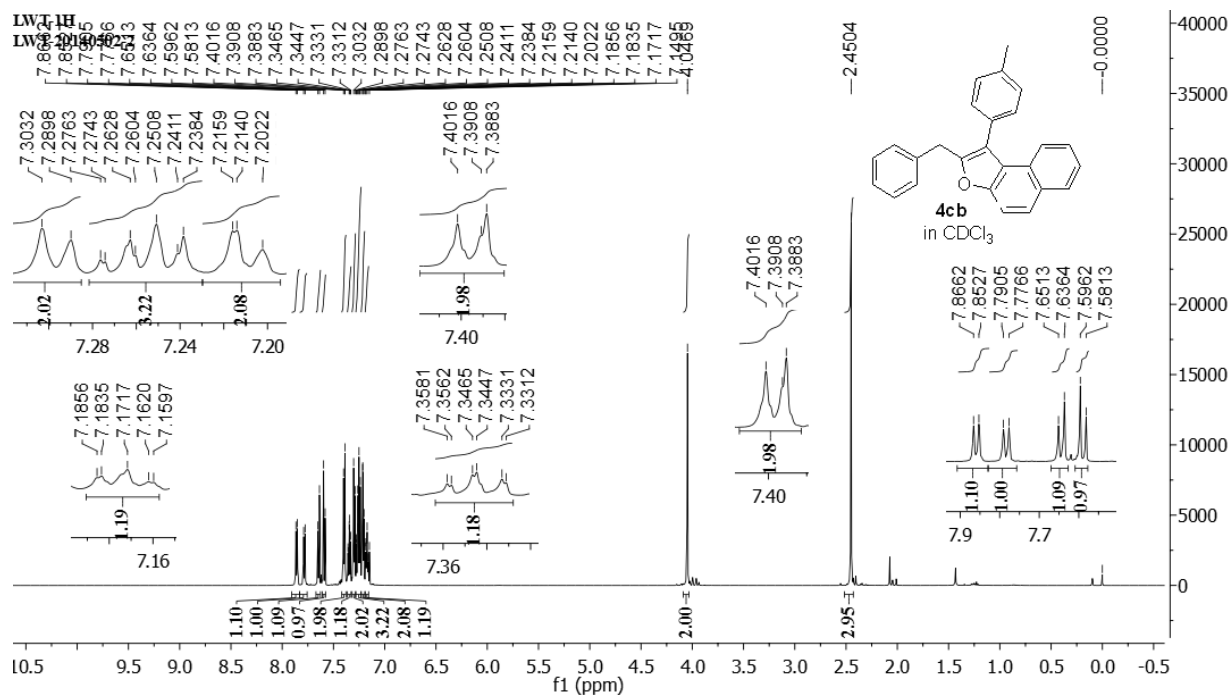

LWT-13C  
LWT-20140502-2

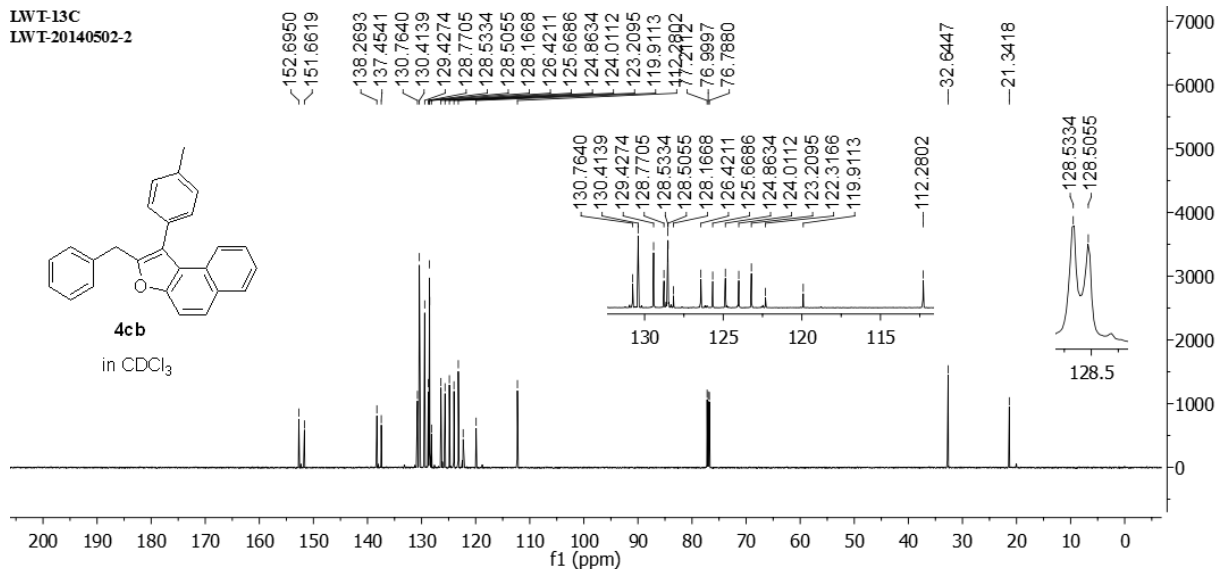

| Sample Name   | LWT-9           | Position    | P1-A9      | Instrument Name | Instrument 1 | User Name              |                        |
|---------------|-----------------|-------------|------------|-----------------|--------------|------------------------|------------------------|
| Inj Vol       | 10              | InjPosition |            | SampleType      | Sample       | IRM Calibration Status | Success                |
| Data Filename | WorklistData9.d | ACQ Method  | YLF-AMPK.m | Comment         |              | Acquired Time          | 10/10/2013 10:11:08 AM |

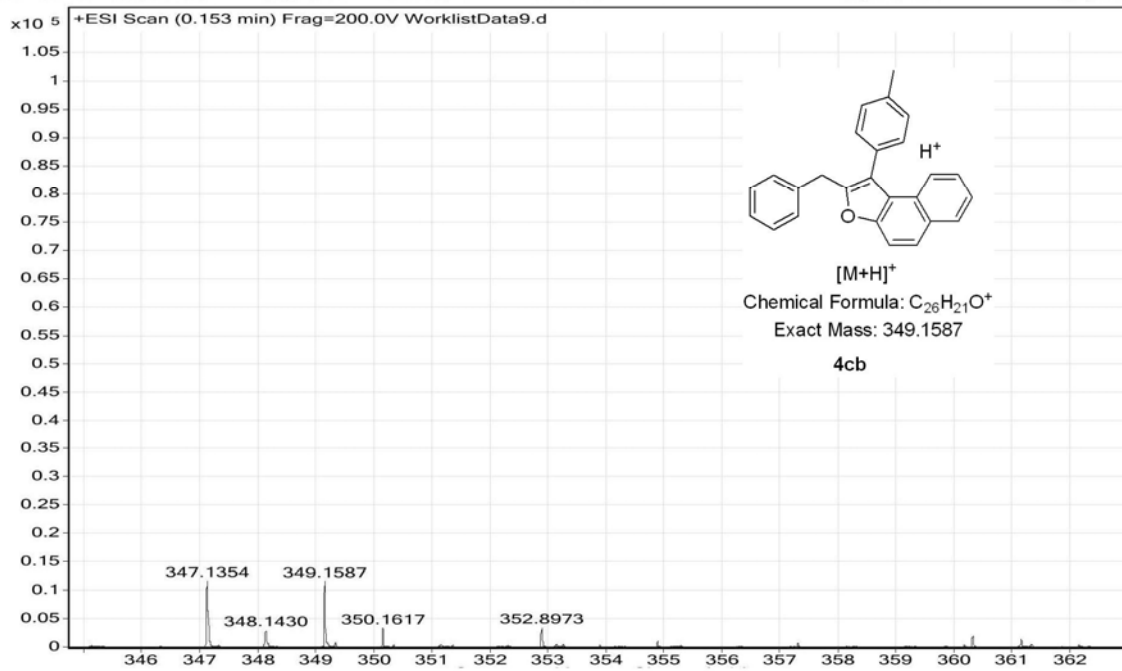



# 2-benzyl-1-phenylnaphtho[2,1-b]furan (4cc)

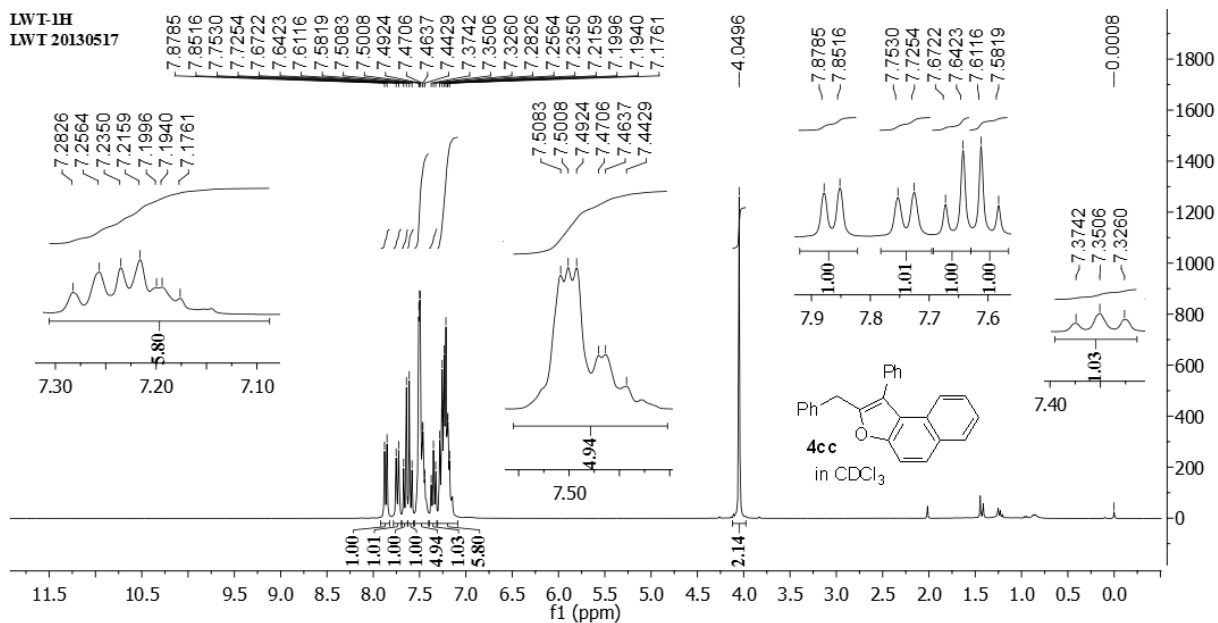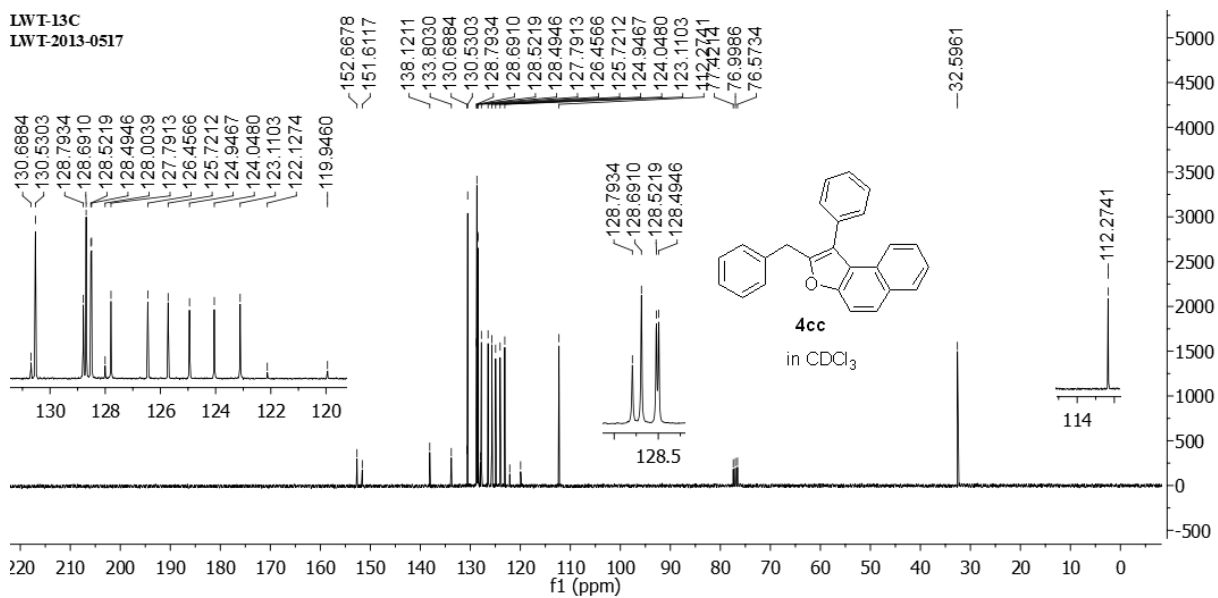



| Sample Name   | LWT-16           | Position    | P1-B7      | Instrument Name | Instrument 1 | User Name              |                        |
|---------------|------------------|-------------|------------|-----------------|--------------|------------------------|------------------------|
| Inj Vol       | 10               | InjPosition |            | SampleType      | Sample       | IRM Calibration Status | Success                |
| Data Filename | WorklistData16.d | ACQ Method  | YLF-AMPK.m | Comment         |              | Acquired Time          | 10/10/2013 10:28:08 AM |

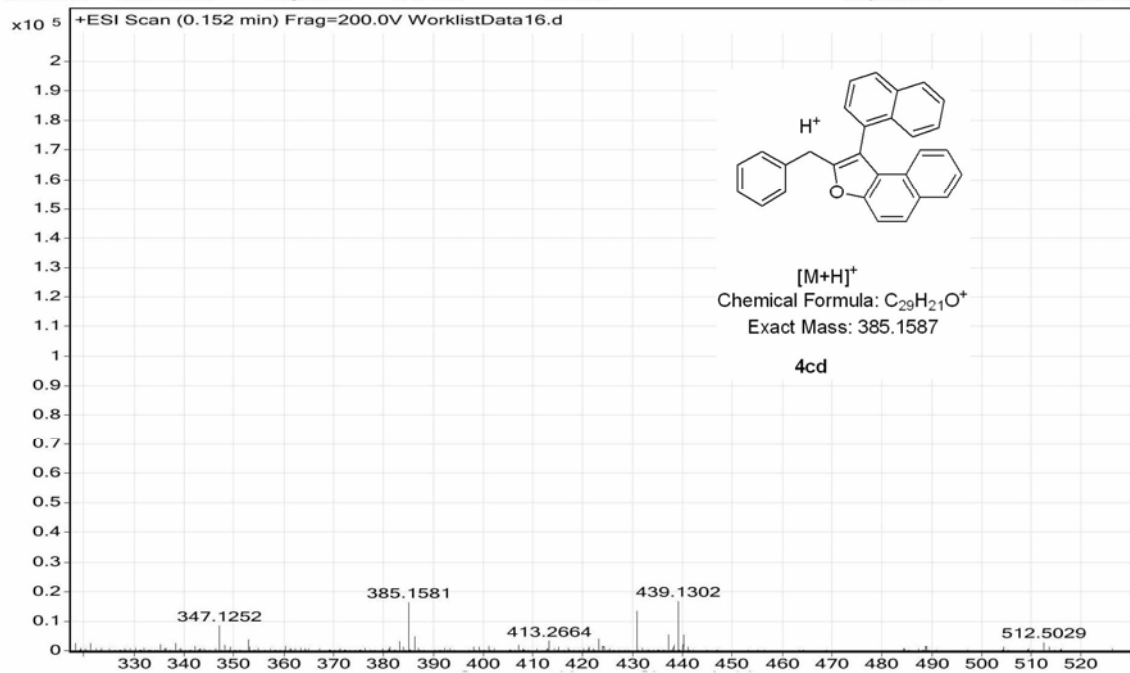

## 2-benzyl-3-(4-methoxyphenyl)-5-methylbenzofuran (4da)

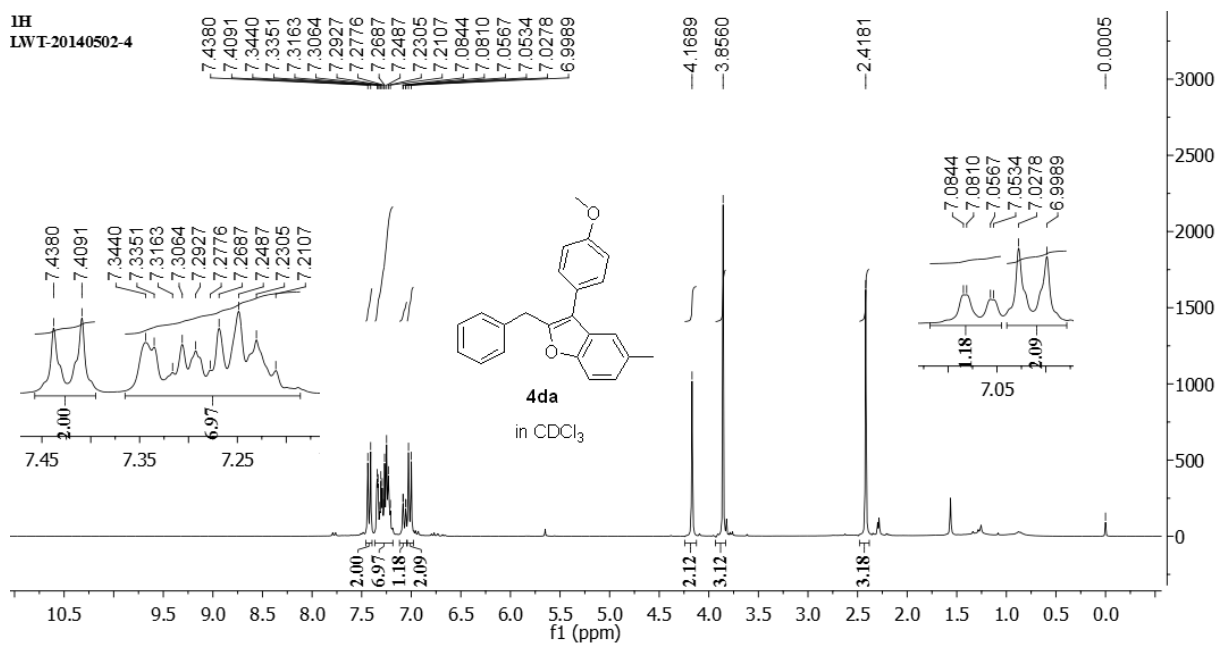

LWT-13C  
LWT-20140502-4

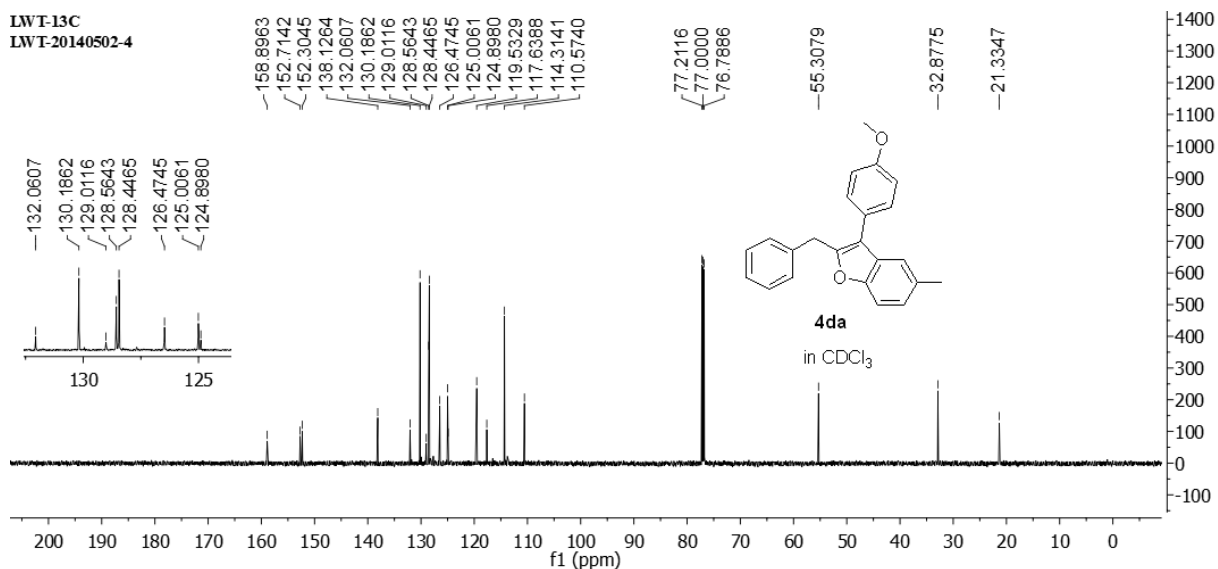

| Sample Name   | LWT-19           | Position    | P1-C1      | Instrument Name | Instrument 1 | User Name              |
|---------------|------------------|-------------|------------|-----------------|--------------|------------------------|
| Inj Vol       | 10               | InjPosition |            | SampleType      | Sample       | IRM Calibration Status |
| Data Filename | WorklistData19.d | ACQ Method  | YLF-AMPK.m | Comment         |              | Success                |
|               |                  |             |            |                 |              | Acquired Time          |

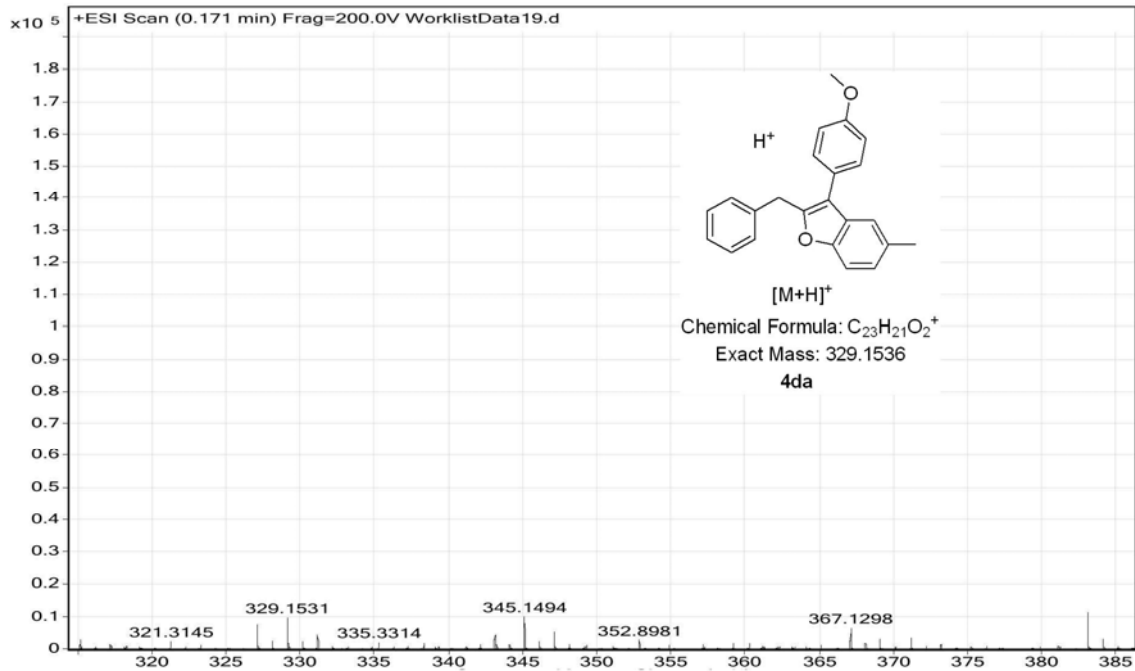

# 2-benzyl-5-methyl-3-(*p*-tolyl)benzofuran (4db)

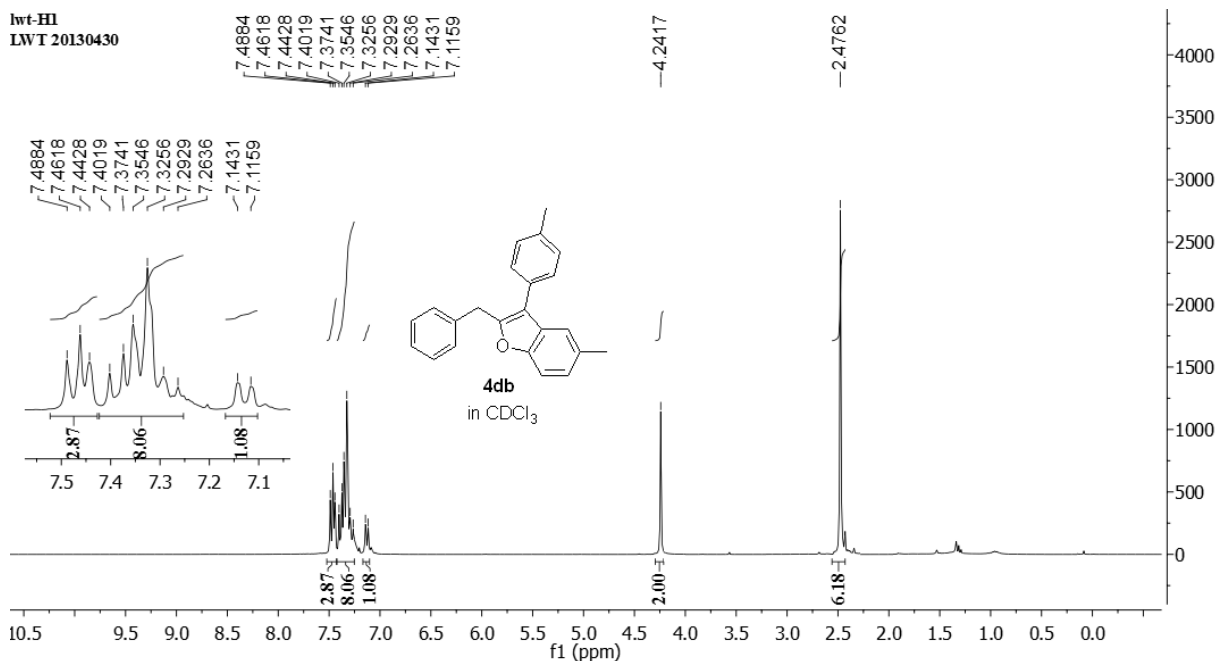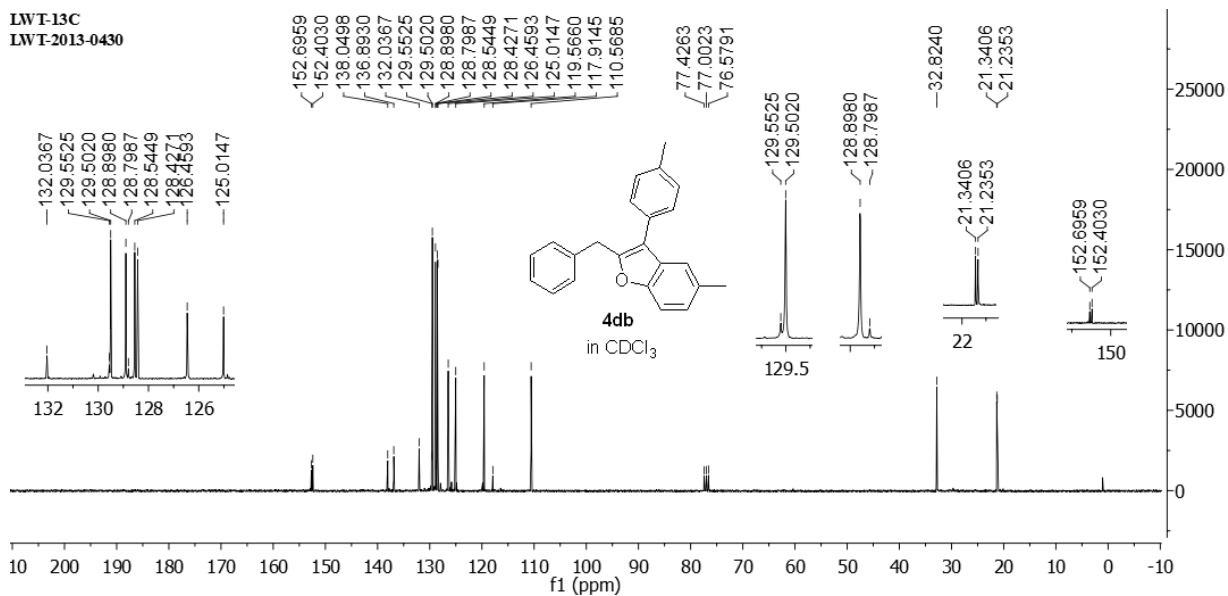

| Sample Name   | LWT-6           | Position    | P1-A6      | Instrument Name | Instrument 1 | User Name              |                        |
|---------------|-----------------|-------------|------------|-----------------|--------------|------------------------|------------------------|
| Inj Vol       | 10              | InjPosition |            | SampleType      | Sample       | IRM Calibration Status | Success                |
| Data Filename | WorklistData6.d | ACQ Method  | YLF-AMPK.m | Comment         |              | Acquired Time          | 10/10/2013 10:03:52 AM |

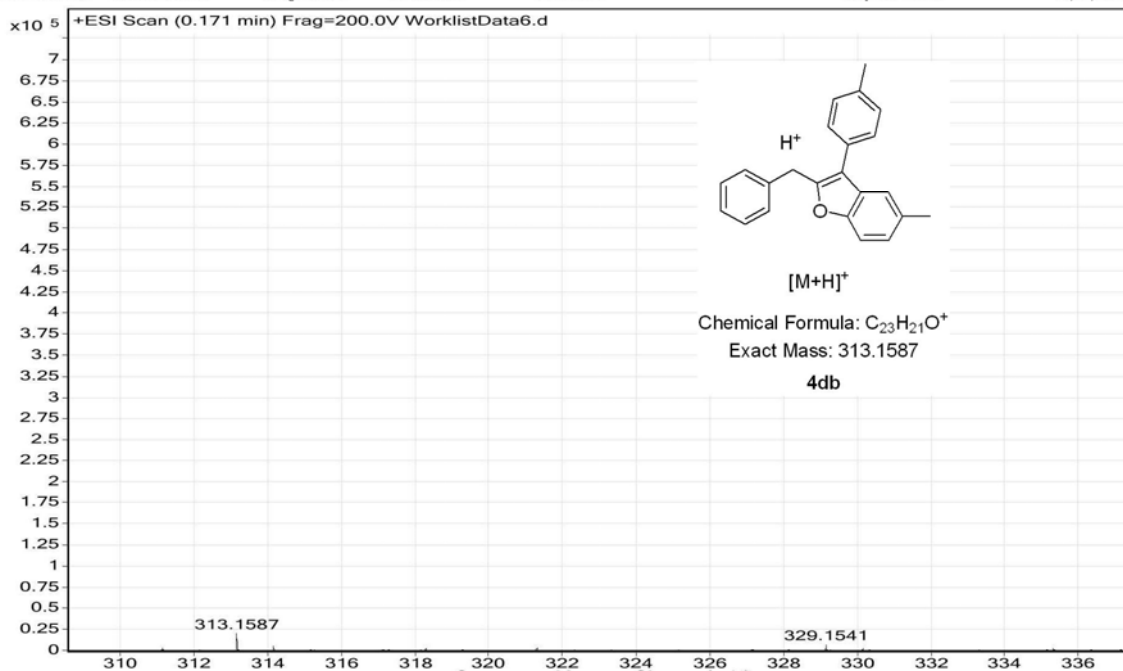

## 2-benzyl-5-methyl-3-phenylbenzofuran (4dc)

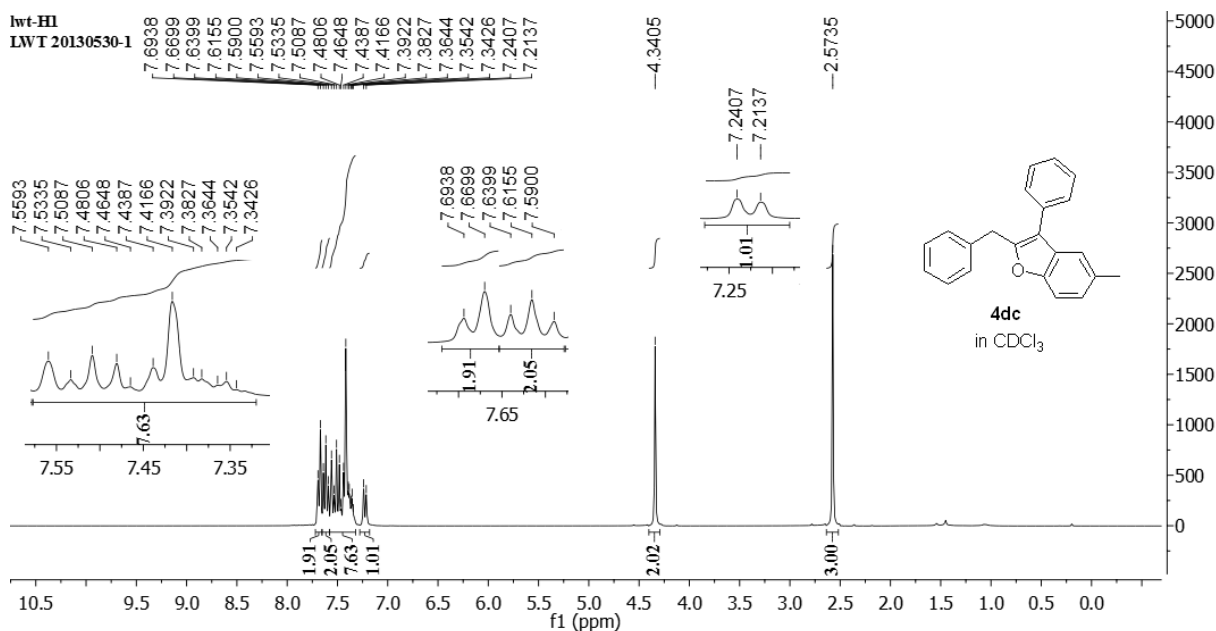

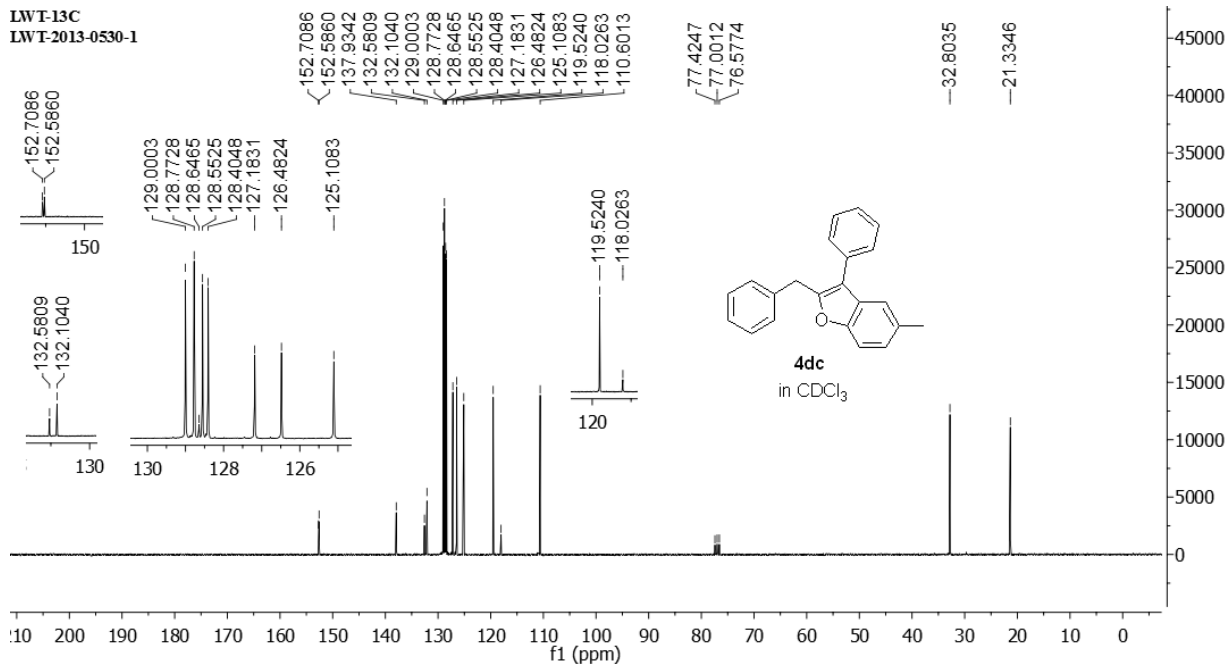

## 2-benzyl-4,6-dimethyl-3-(*p*-tolyl)benzofuran (**4eb**)

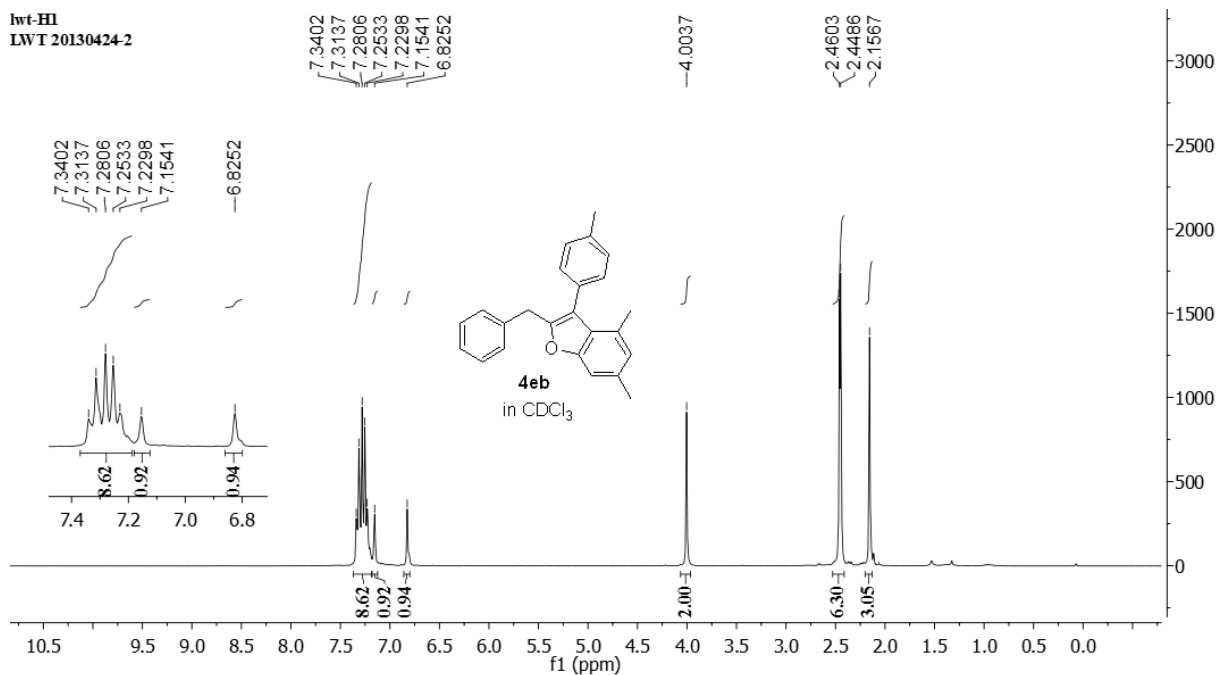

lwt-C13  
LWT-2013-0424-2

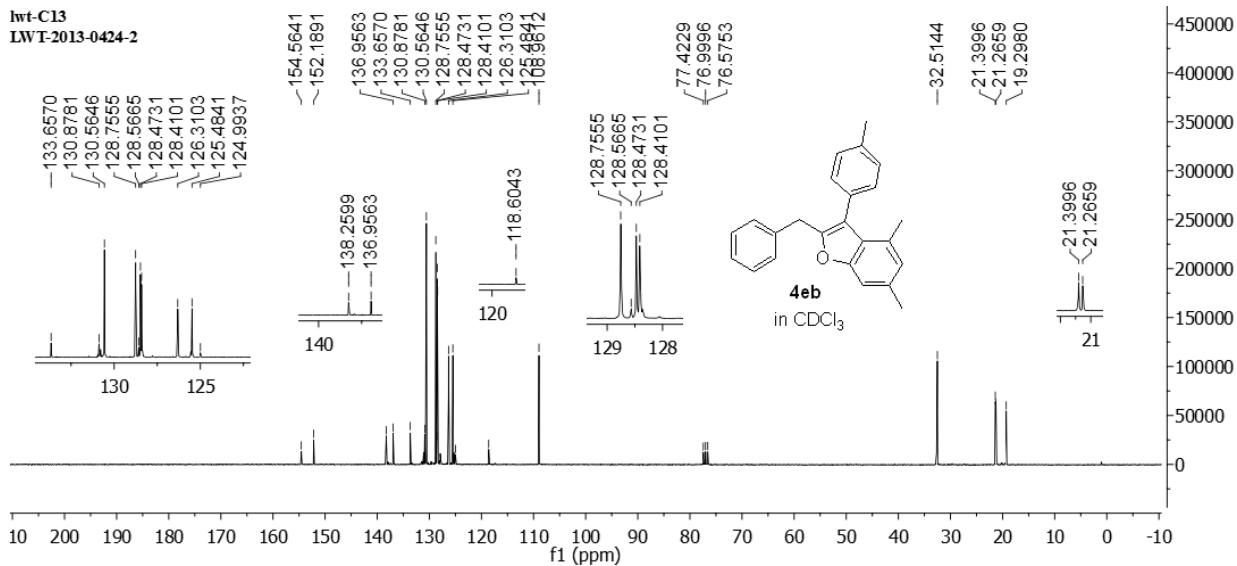

| Sample Name   | LWT-4           | Position    | P1-A1      | Instrument Name | Instrument 1 | User Name              |
|---------------|-----------------|-------------|------------|-----------------|--------------|------------------------|
| Inj Vol       | 10              | InjPosition |            | SampleType      | Sample       | IRM Calibration Status |
| Data Filename | WorklistData4.d | ACQ Method  | YLF-AMPK.m | Comment         |              | Success                |
|               |                 |             |            |                 |              | Acquired Time          |
|               |                 |             |            |                 |              | 10/10/2013 9:59:00 AM  |

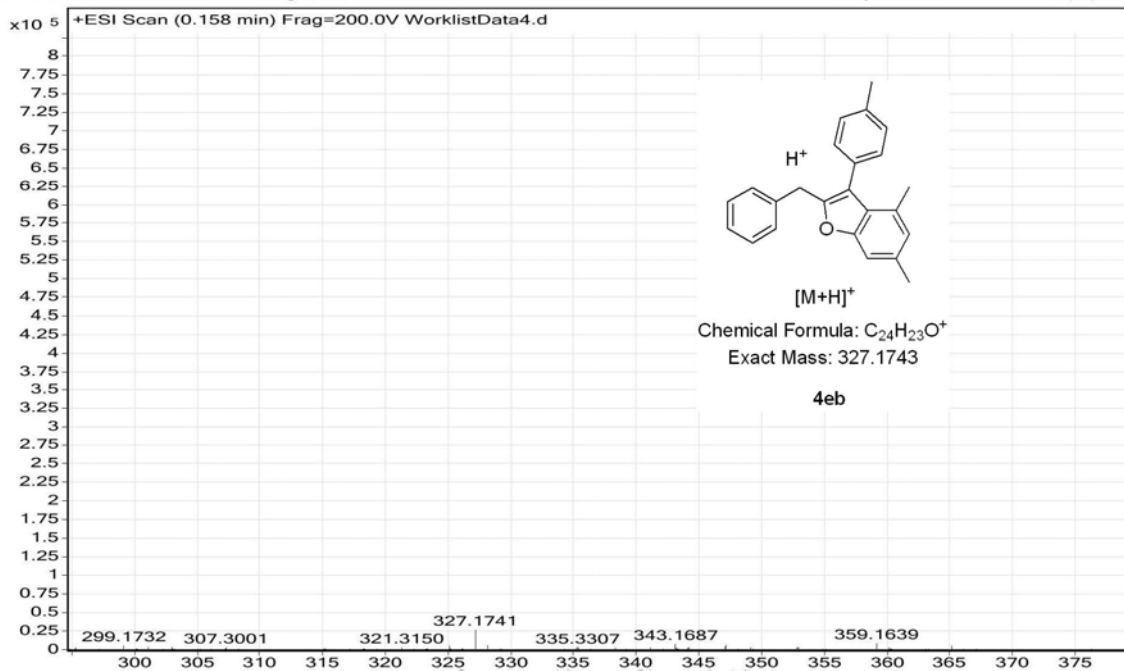



# 2-benzyl-4,6-dimethyl-3-phenylbenzofuran (4ec)

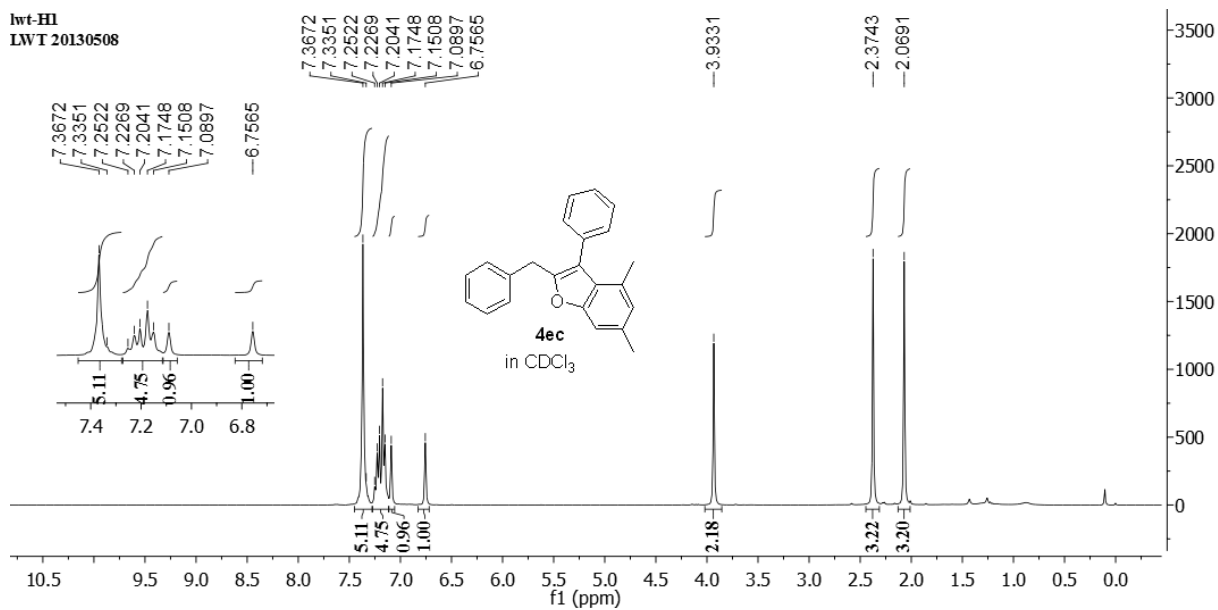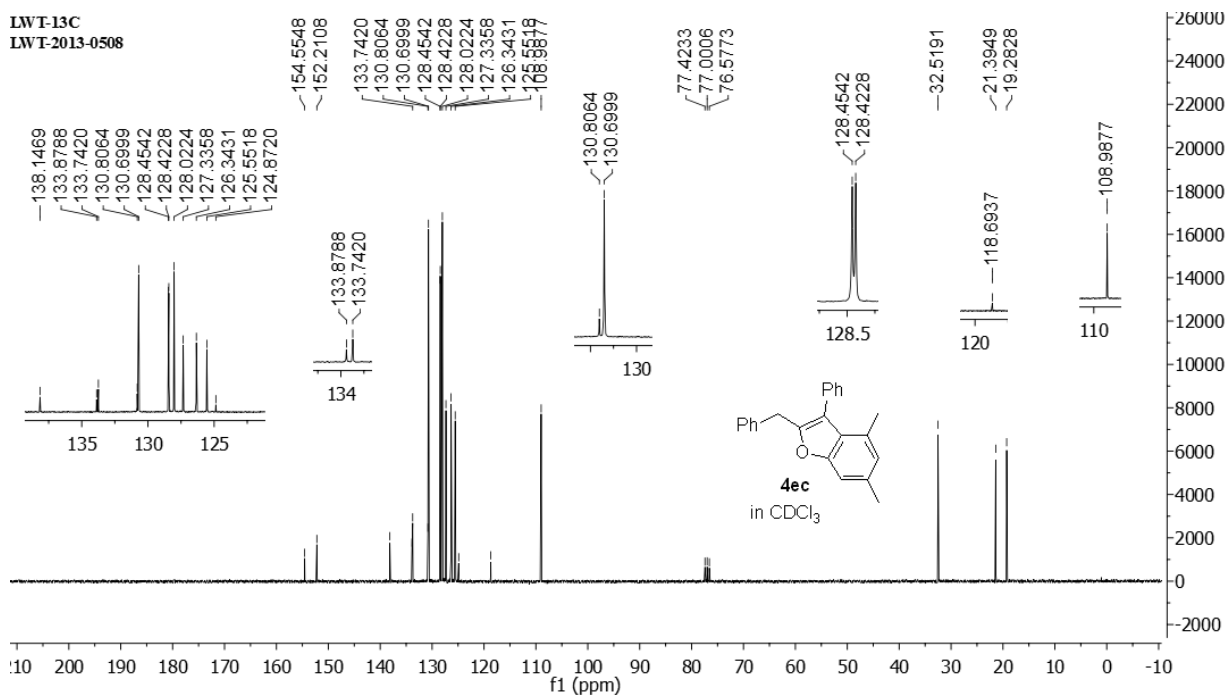

|               |                 |             |            |                 |              |                        |                        |
|---------------|-----------------|-------------|------------|-----------------|--------------|------------------------|------------------------|
| Sample Name   | LWT-8           | Position    | P1-A8      | Instrument Name | Instrument 1 | User Name              |                        |
| Inj Vol       | 10              | InjPosition |            | SampleType      | Sample       | IRM Calibration Status | Success                |
| Data Filename | WorklistData8.d | ACQ Method  | YLF-AMPK.m | Comment         |              | Acquired Time          | 10/10/2013 10:08:43 AM |

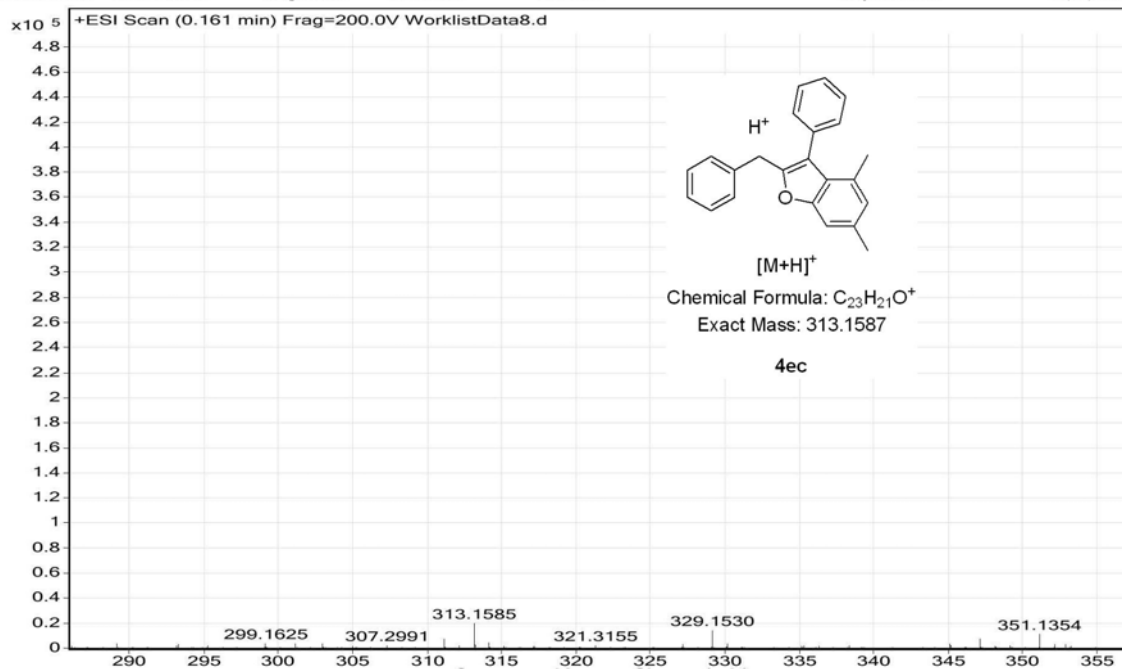

## 2-benzyl-3-(4-bromophenyl)-4,6-dimethylbenzofuran (4ee)

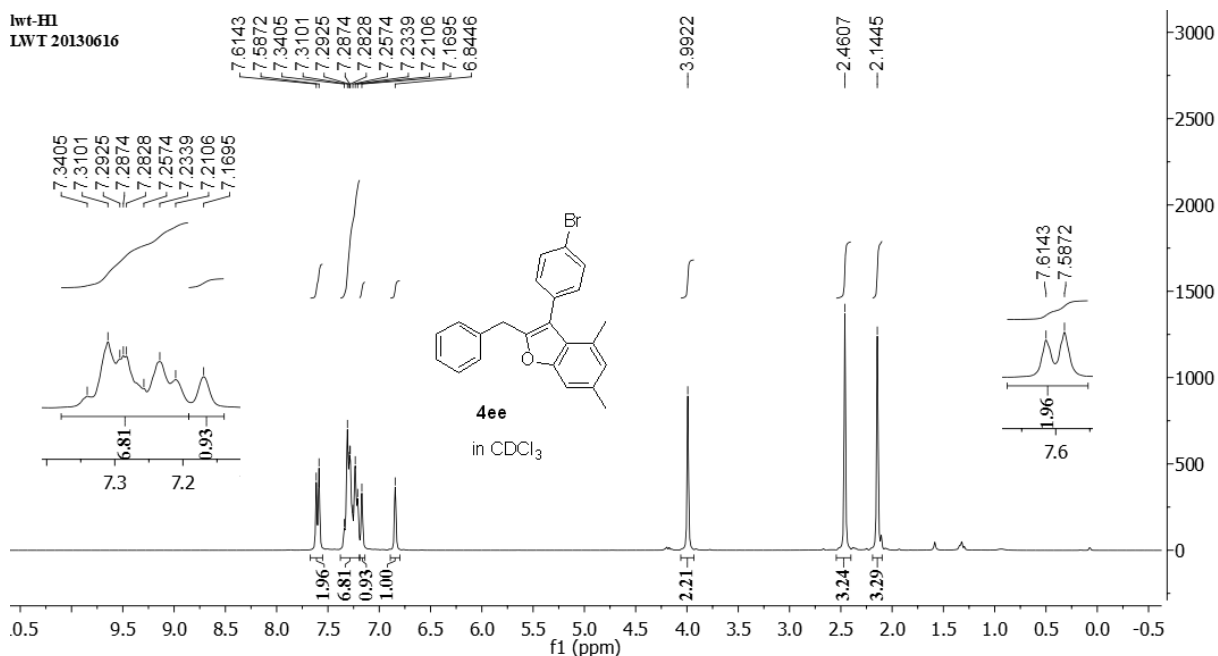

LWT-13C  
LWT-2013-0616

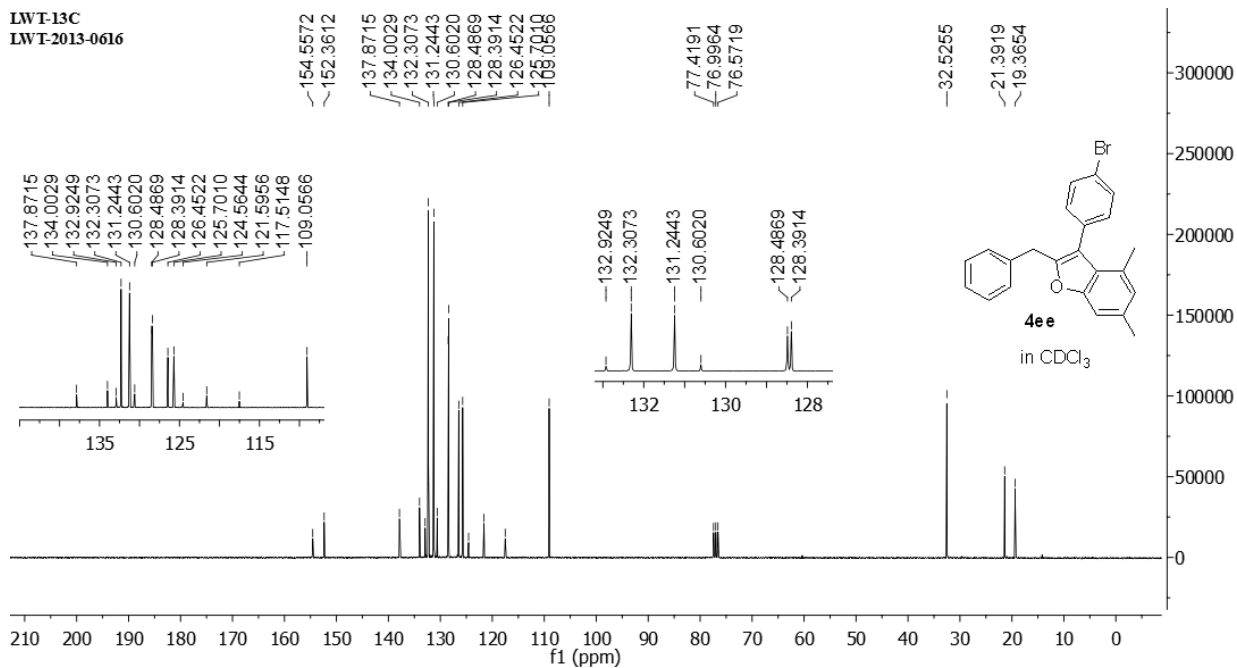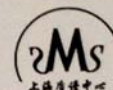

Shanghai Mass Spectrometry Center  
Shanghai Institute of Organic Chemistry  
Chinese Academy of Sciences  
High Resolution MS Data Report

Instrument: Waters Micromass GCT Premier    Ionisation Mode: EI+    Electron Energy: 70eV

Card Serial Number: GCT-P-T14-05-1536  
Sample Serial Number: 2009146-10-24-63-4ee  
Operator: Li  
Date: 2014/05/16

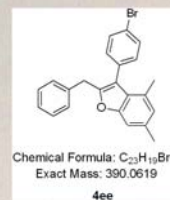

Elemental Composition Report

Single Mass Analysis  
Tolerance = 5.0 PPM / DBE: min = -1.5, max = 50.0  
Element prediction: Off

Monoisotopic Mass, Odd and Even Electron Ions  
271 formula(e) evaluated with 3 results within limits (all results (up to 1000) for each mass)

Elements Used:

| Mass     | Calc. Mass | mDa  | PPM  | DBE  | i-FIT | Formula                                                            |
|----------|------------|------|------|------|-------|--------------------------------------------------------------------|
| 390.0622 | 390.0619   | 0.3  | 0.8  | 14.0 | 9.6   | C <sub>23</sub> H <sub>19</sub> O Br                               |
|          | 390.0613   | 0.9  | 2.3  | 5.0  | 29.6  | C <sub>15</sub> H <sub>23</sub> N <sub>2</sub> O <sub>3</sub> S Br |
|          | 390.0641   | -1.9 | -4.9 | 21.0 | 295.2 | C <sub>24</sub> H <sub>10</sub> N <sub>2</sub> O <sub>4</sub>      |

## 2-benzyl-3-(4-methoxyphenyl)-5-phenylbenzofuran (4fa)

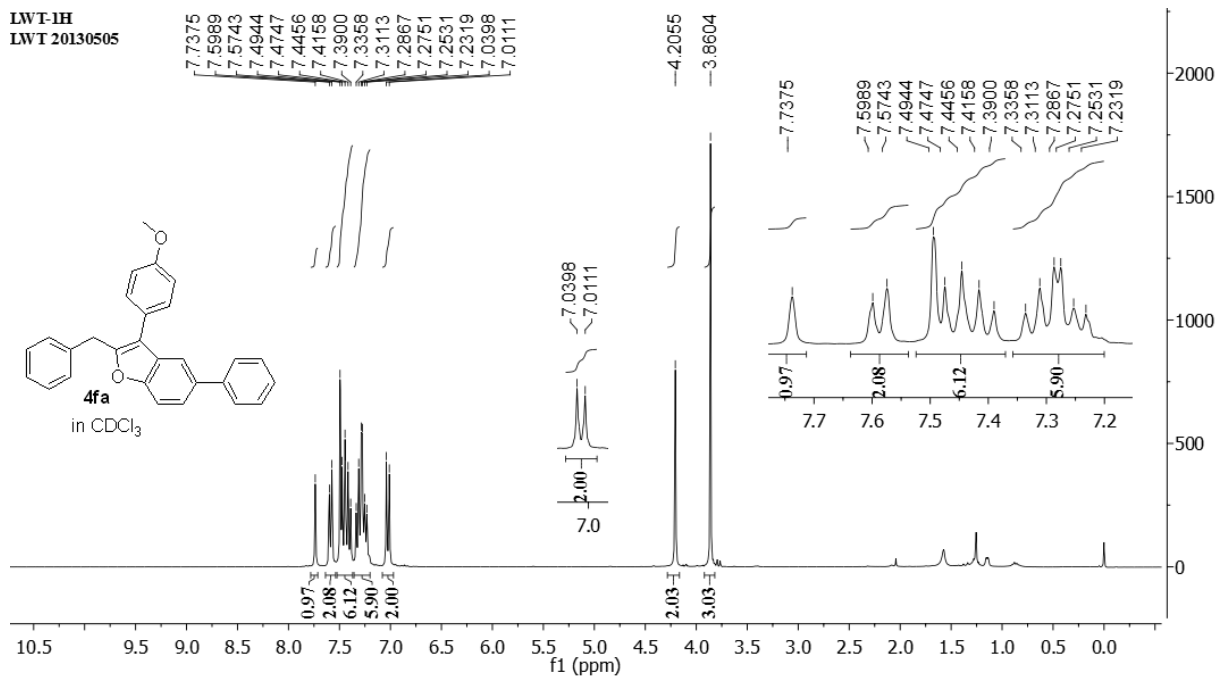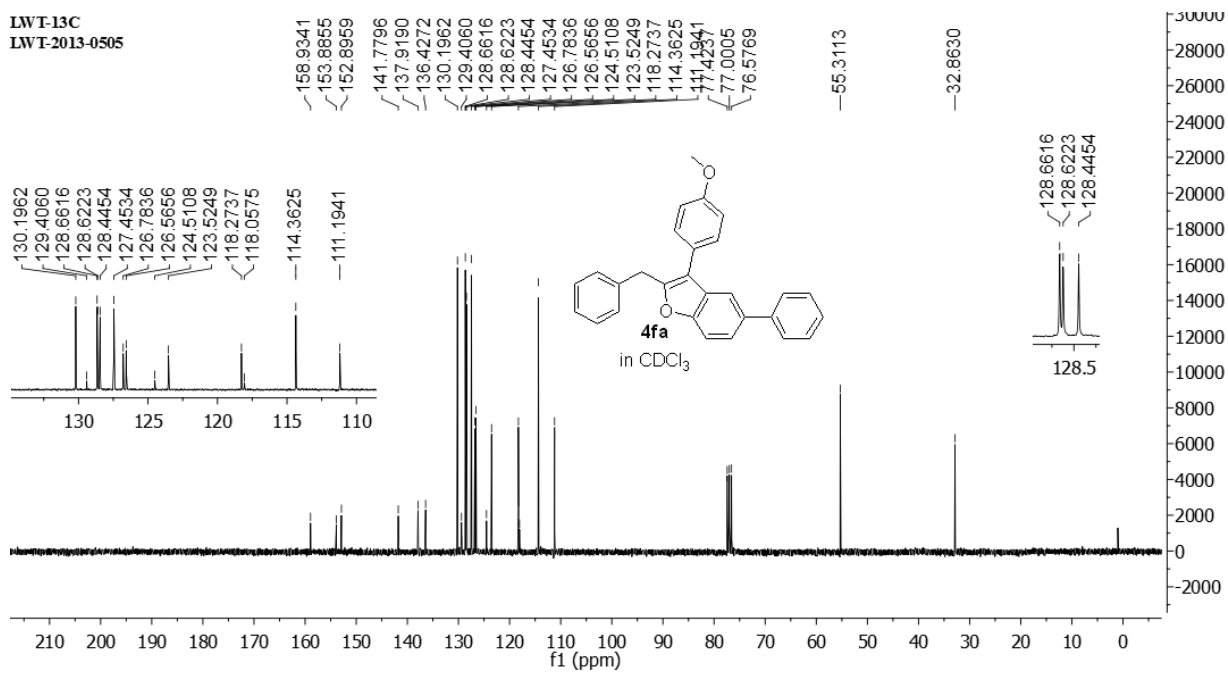

|               |                 |             |            |                 |              |                        |                        |
|---------------|-----------------|-------------|------------|-----------------|--------------|------------------------|------------------------|
| Sample Name   | LWT-7           | Position    | P1-A7      | Instrument Name | Instrument 1 | User Name              |                        |
| Inj Vol       | 10              | InjPosition |            | SampleType      | Sample       | IRM Calibration Status | Success                |
| Data Filename | WorklistData7.d | ACQ Method  | YLF-AMPK.m | Comment         |              | Acquired Time          | 10/10/2013 10:06:17 AM |

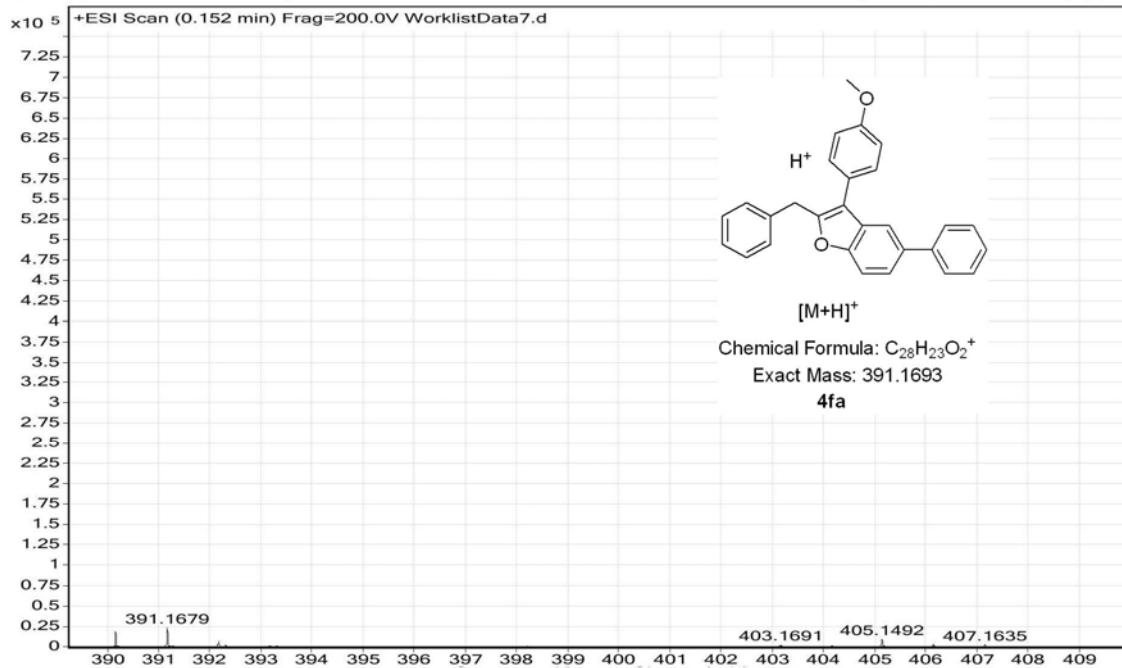

## 2-benzyl-5-phenyl-3-(p-tolyl)benzofuran (4fb)

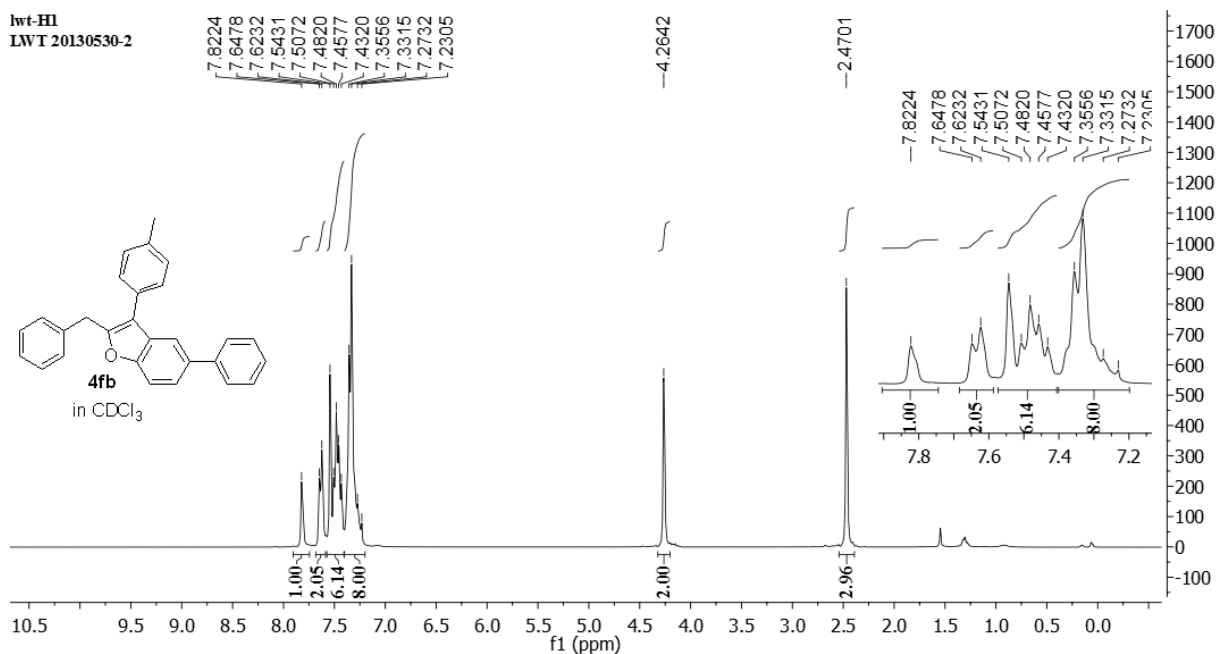

LWT-13C  
LWT-2013-0530-2

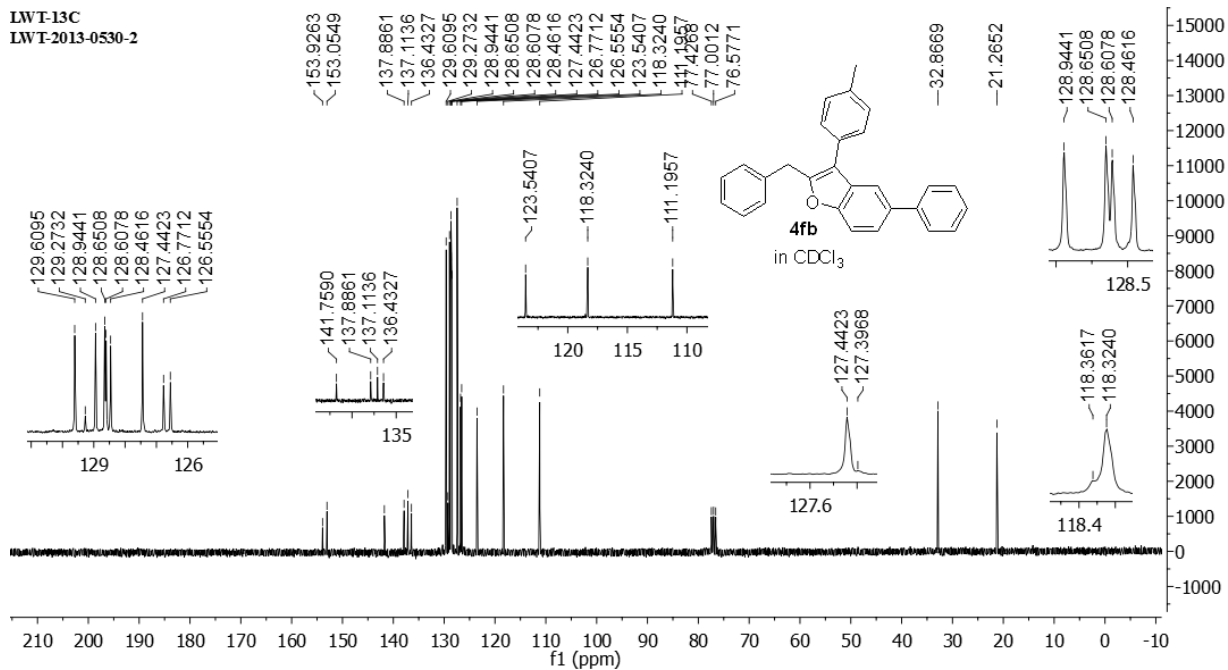

| Sample Name   | LWT-13           | Position    | P1-B4      | Instrument Name | Instrument 1 | User Name              |                        |
|---------------|------------------|-------------|------------|-----------------|--------------|------------------------|------------------------|
| Inj Vol       | 10               | InjPosition |            | SampleType      | Sample       | IRM Calibration Status | Success                |
| Data Filename | WorklistData13.d | ACQ Method  | YLF-AMPK.m | Comment         |              | Acquired Time          | 10/10/2013 10:20:51 AM |

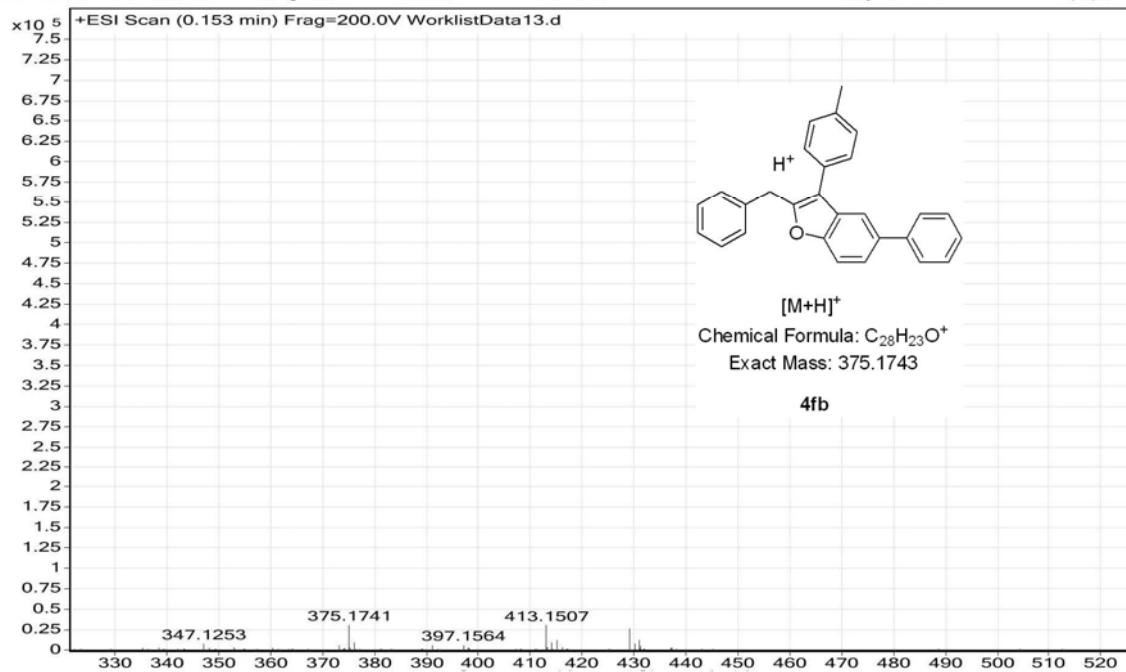

# 2-benzyl-3,5-diphenylbenzofuran (4fc)

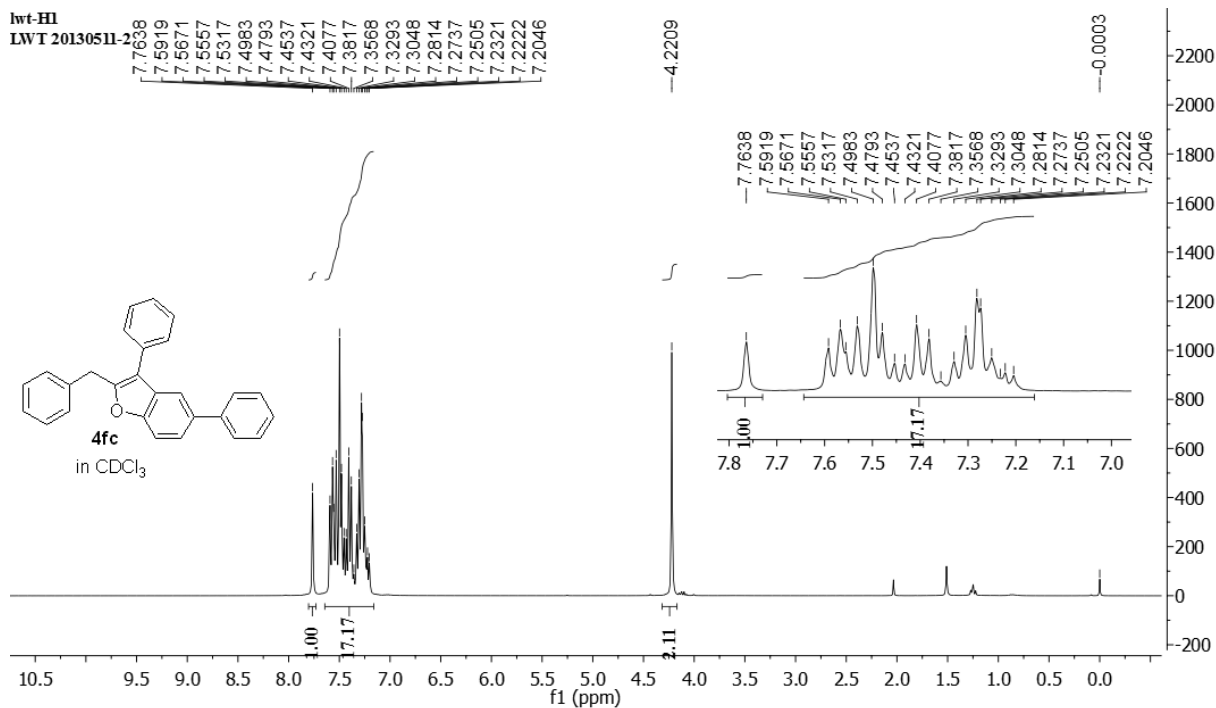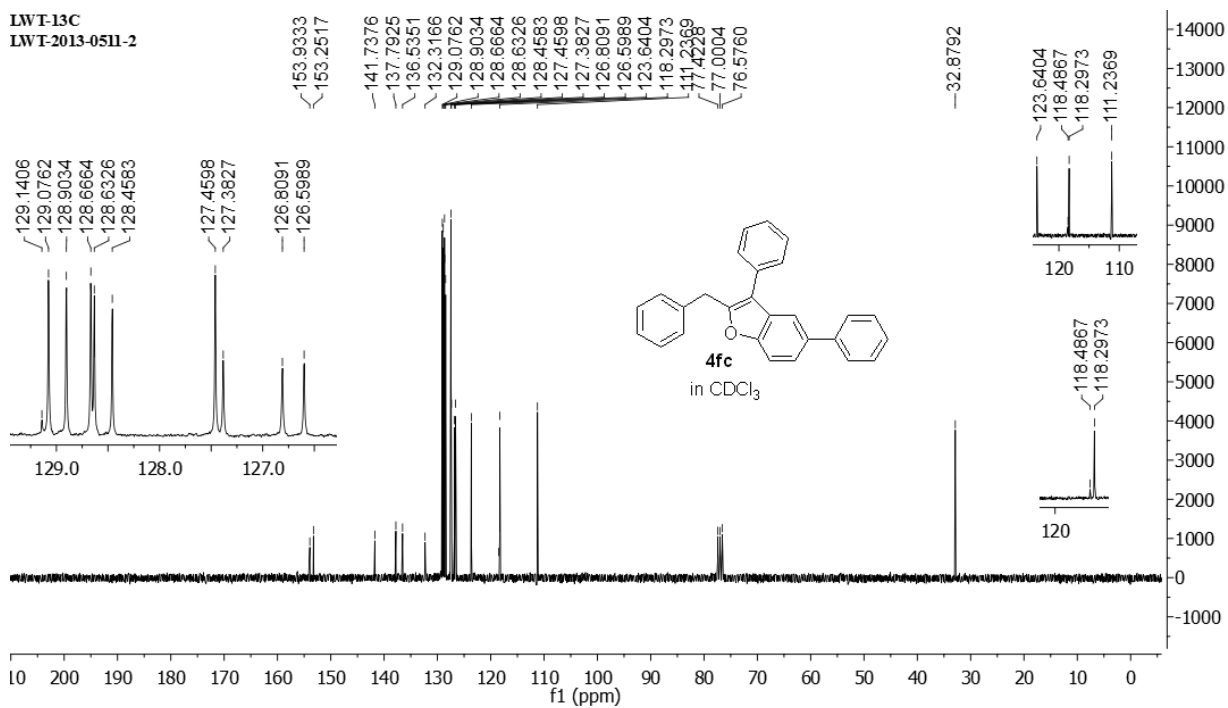

# 2-benzyl-5-chloro-3-(4-methoxyphenyl)benzofuran (4ga)

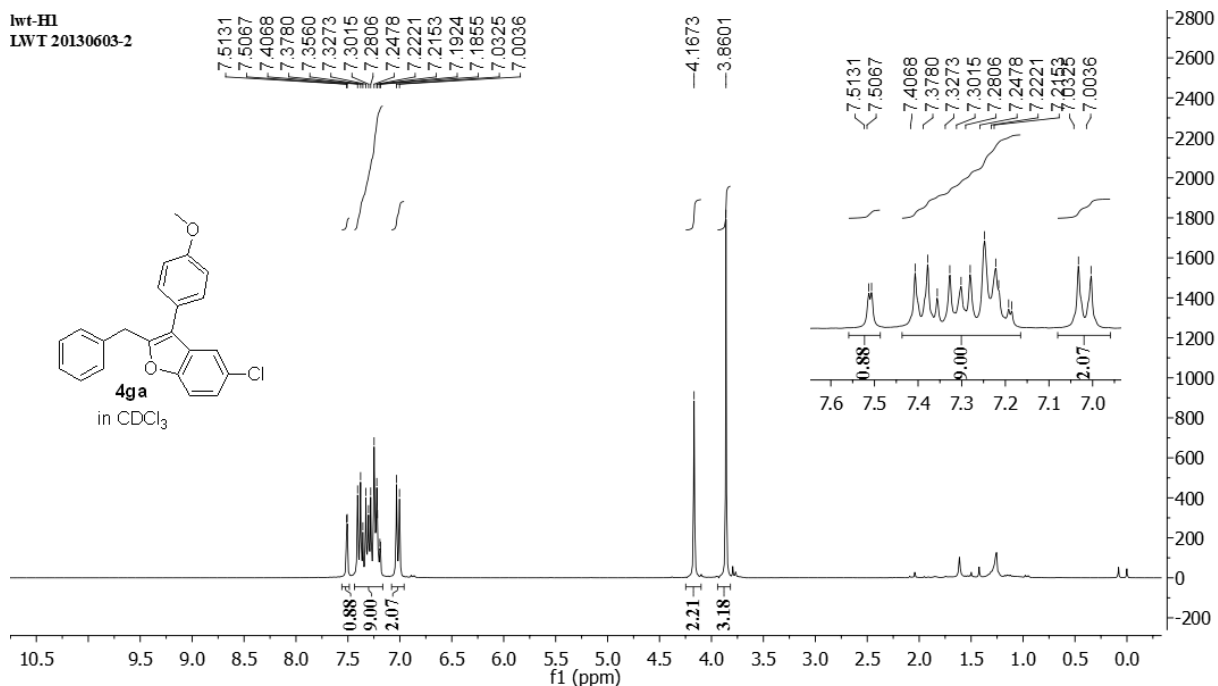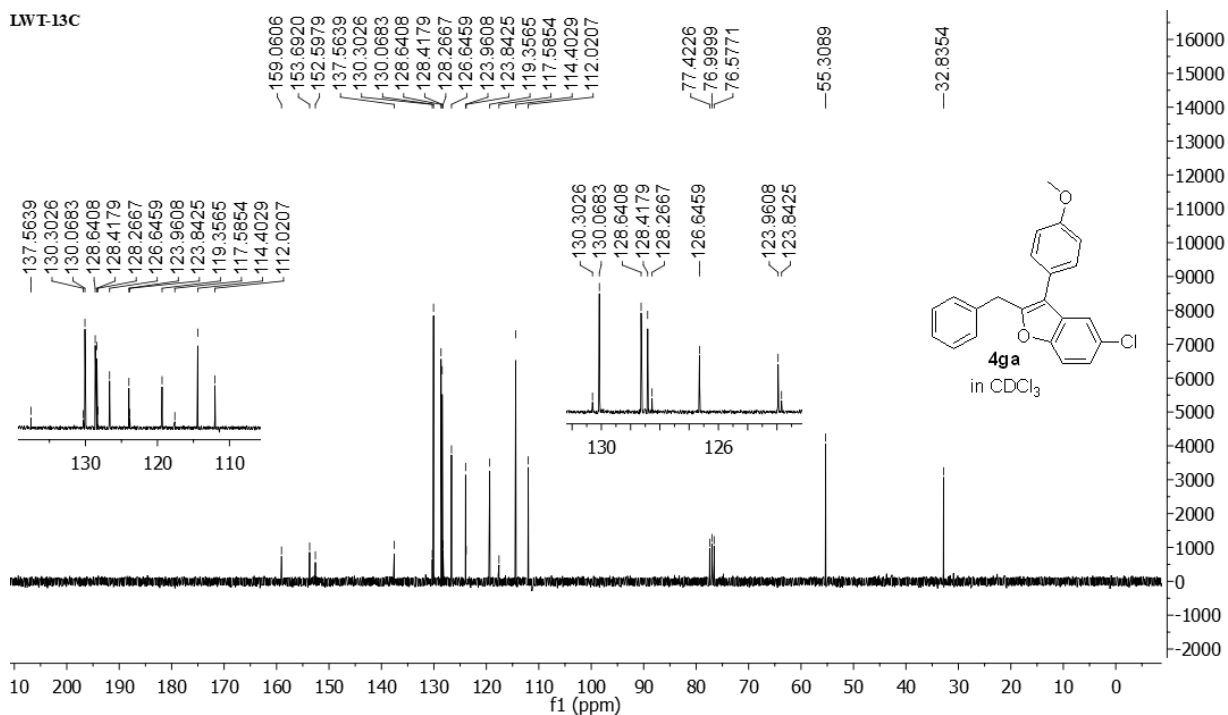



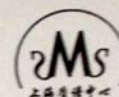

Shanghai Mass Spectrometry Center  
Shanghai Institute of Organic Chemistry  
Chinese Academic of Sciences  
High Resolution MS Data Report

Instrument: Waters Micromass GCT Premier    Ionisation Mode: EI+    Electron Energy: 70eV

Card Serial Number: GCT-P-T14-05-1537  
Sample Serial Number: 2009146-10-24-63-4ga  
Operator: Li  
Date: 2014/05/16

Chemical Formula: C<sub>22</sub>H<sub>17</sub>ClO<sub>2</sub>  
Exact Mass: 348.0917

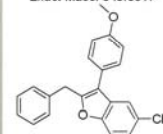

Chemical Formula: C<sub>22</sub>H<sub>17</sub>ClO<sub>2</sub>  
Exact Mass: 348.0917  
**4ga**

#### Elemental Composition Report

Single Mass Analysis  
Tolerance = 5.0 PPM / DBE: min = -1.5, max = 50.0  
Element prediction: Off

Monoisotopic Mass, Odd and Even Electron Ions  
449 formula(e) evaluated with 3 results within limits (all results (up to 1000) for each mass)

#### Elements Used:

C: 0-60    H: 0-80    N: 0-2    O: 0-4    S: 0-1    Cl: 0-1    Br: 0-1

Minimum:

Maximum:

Mass

348.0913

Calc. Mass

348.0911

348.0917

348.0899

mDa

0.2

-0.4

1.4

PPM

0.6

-1.1

4.0

DBE

-1.5

5.0

19.0

i-FIT

5.8

3.7

3.4

Formula

C14 H21 N2 O4 S Cl

C22 H17 O2 Cl

C23 H12 N2 O2

## 2-benzyl-5-chloro-3-phenylbenzofuran (4gc)

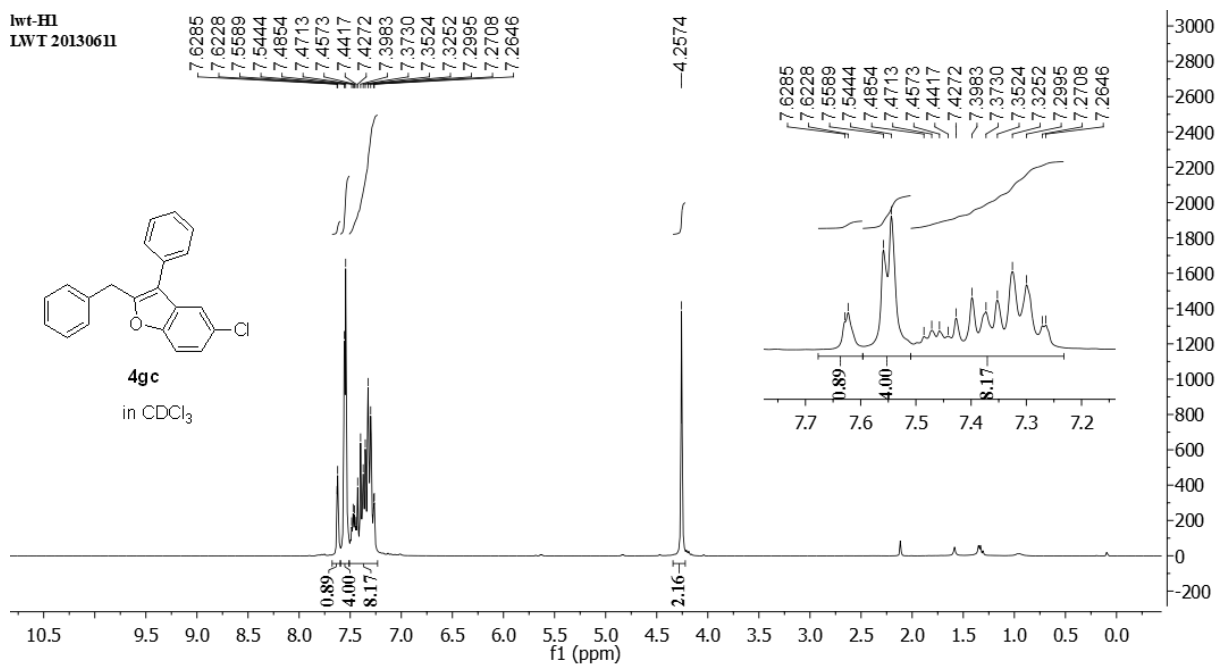

LWT-13C  
LWT-2013-0611

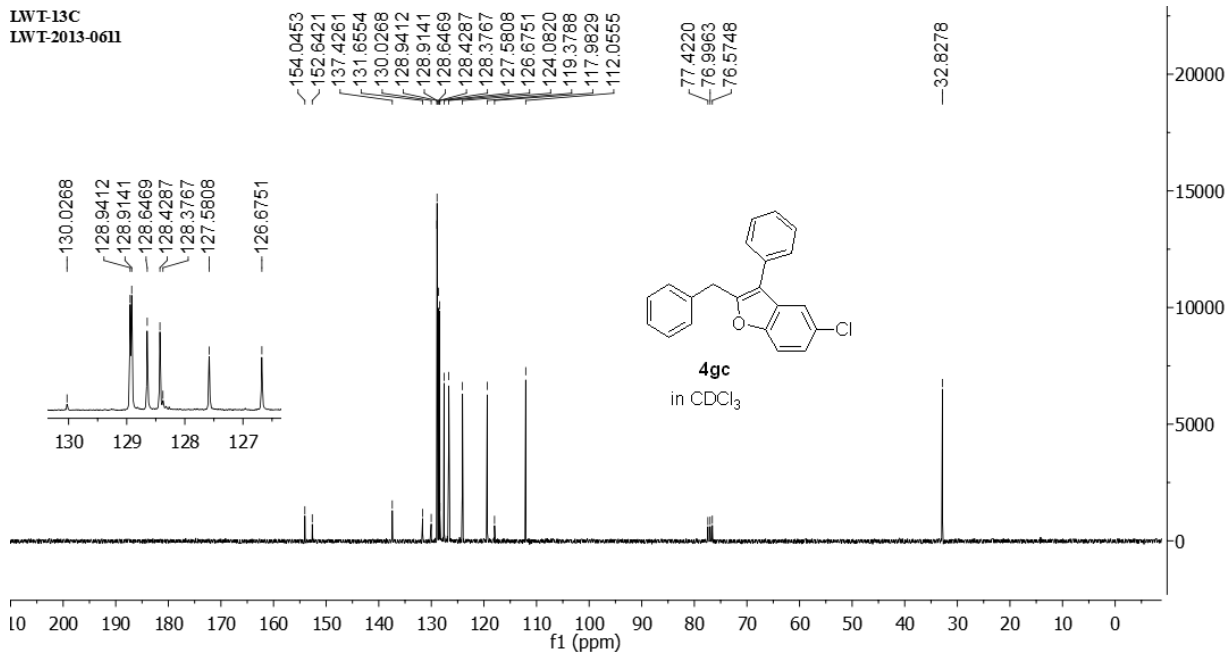

### N-(2-benzyl-3-(4-methoxyphenyl)benzofuran-5-yl)acetamide (4ha)

LWT-1H  
LWT-20140502-1

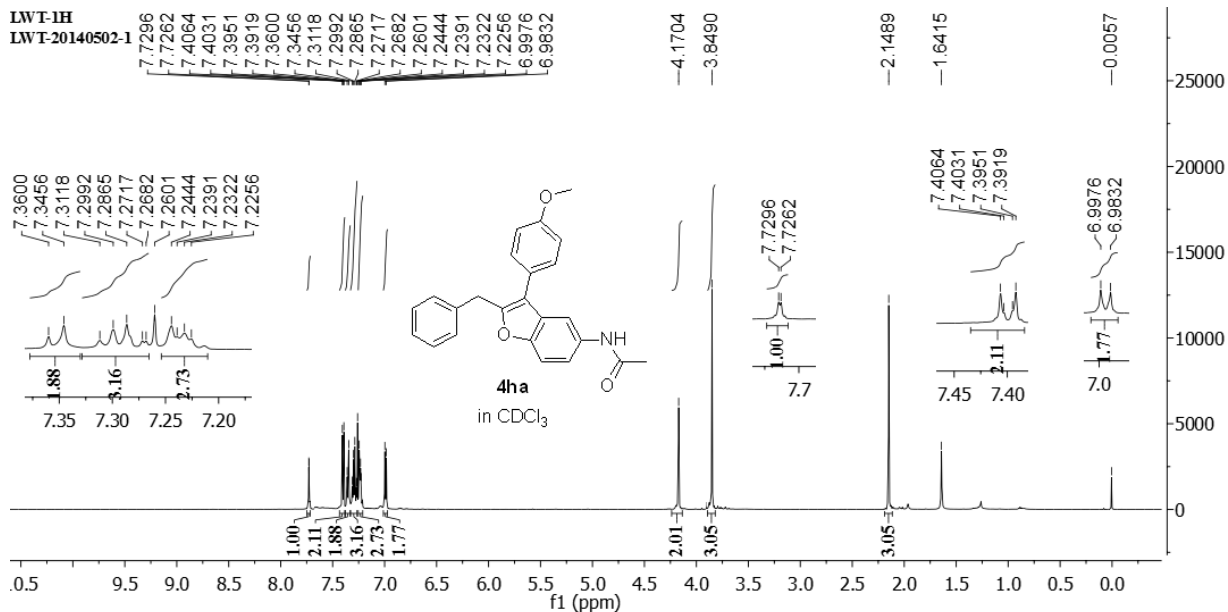

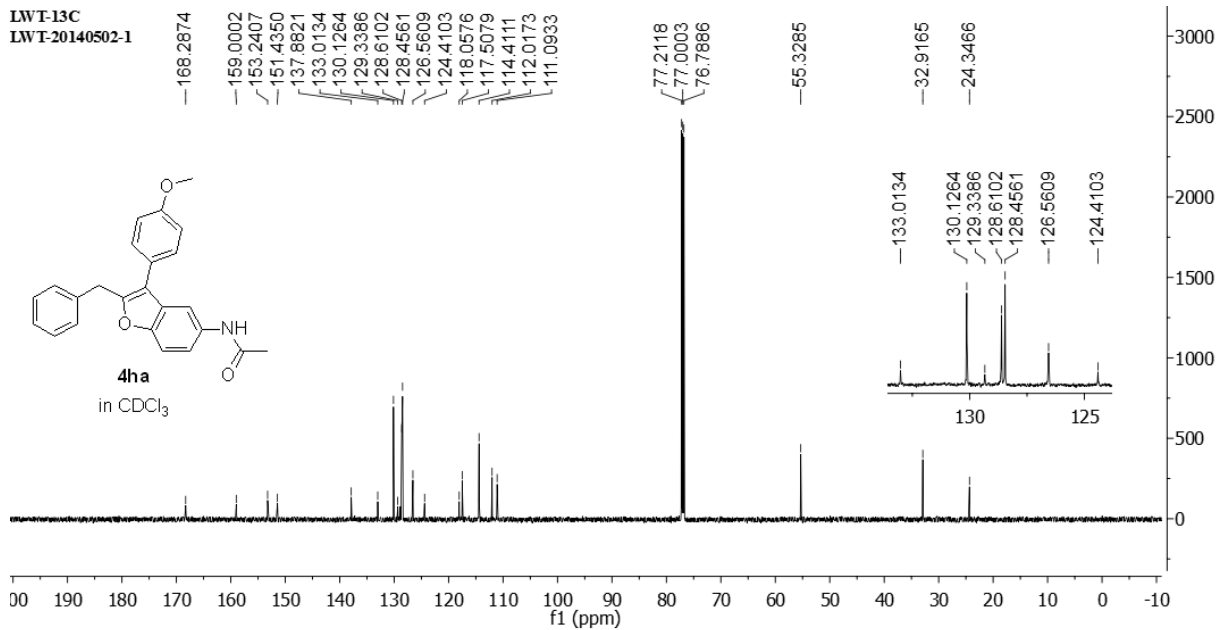

| Sample Name      | Position    | Instrument Name | User Name              |
|------------------|-------------|-----------------|------------------------|
| LWT-10           | PI-B1       | Instrument 1    |                        |
| Inj Vol          | InjPosition | SampleType      | IRM Calibration Status |
| 10               |             | Sample          | Success                |
| Data Filename    | ACQ Method  | Comment         | Acquired Time          |
| WorklistData10.d | YLF-AMPK.m  |                 | 10/10/2013 10:13:34 AM |

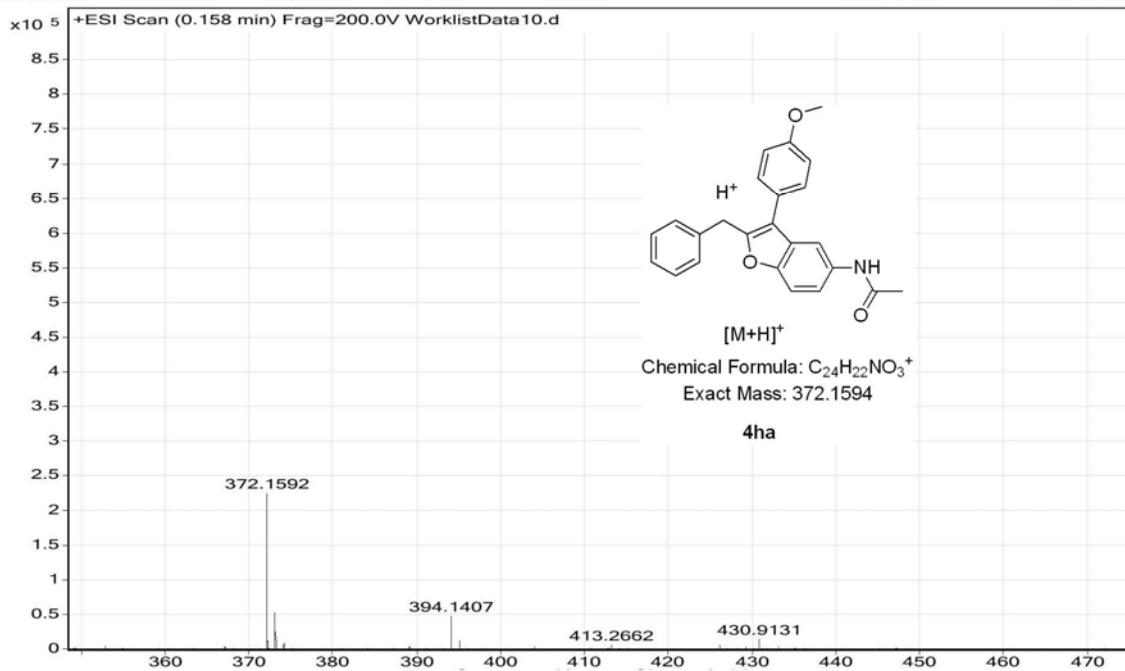

# N-(2-benzyl-3-phenylbenzofuran-5-yl)acetamide (4hc)

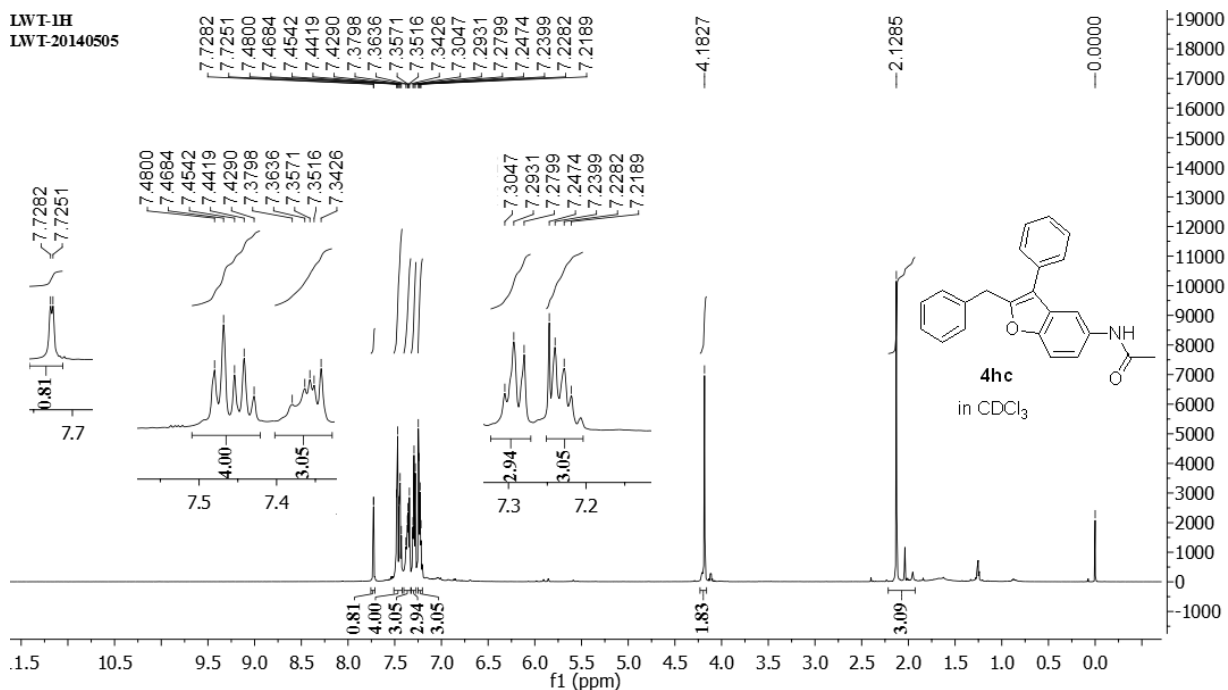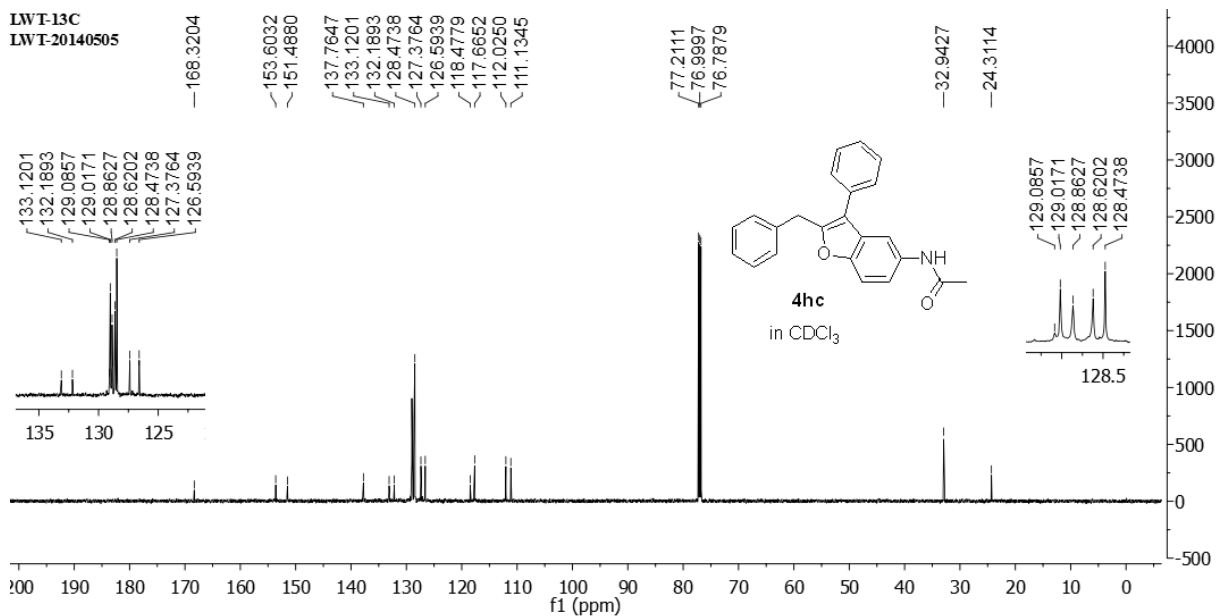

|               |                  |             |            |                 |              |                        |                        |
|---------------|------------------|-------------|------------|-----------------|--------------|------------------------|------------------------|
| Sample Name   | LWT-11           | Position    | P1-B2      | Instrument Name | Instrument 1 | User Name              |                        |
| Inj Vol       | 10               | InjPosition |            | SampleType      | Sample       | IRM Calibration Status | Success                |
| Data Filename | WorklistData11.d | ACQ Method  | YLF-AMPK.m | Comment         |              | Acquired Time          | 10/10/2013 10:16:00 AM |

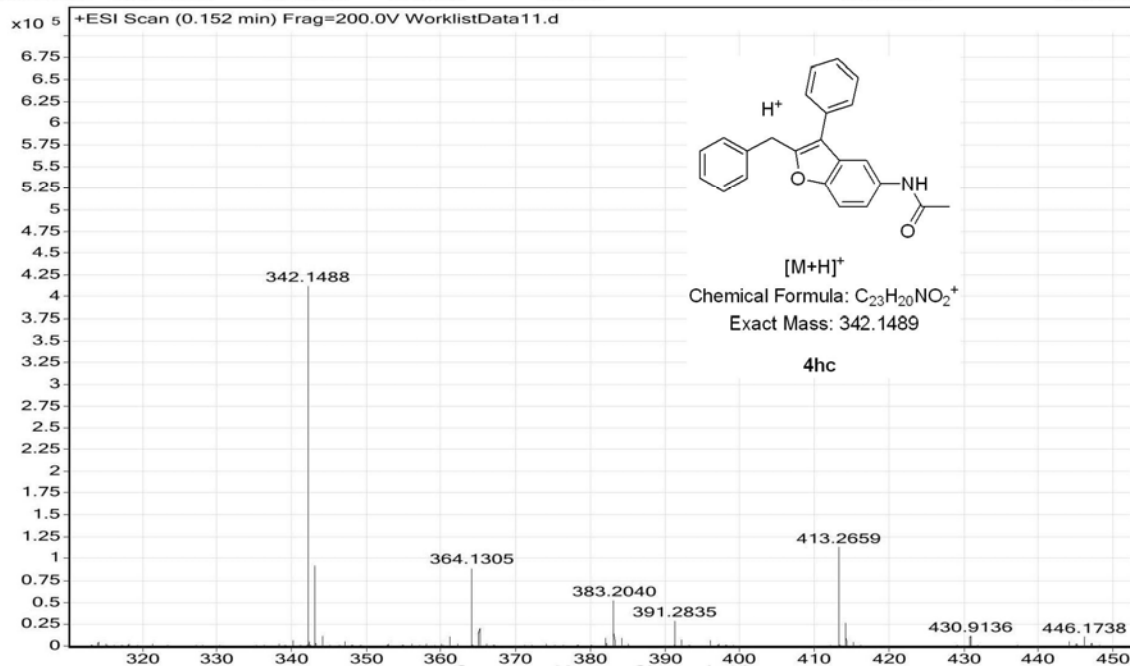

### **tert-butyl (2-benzyl-3-(4-methoxyphenyl)benzofuran-5-yl)carbamate (4ia)**

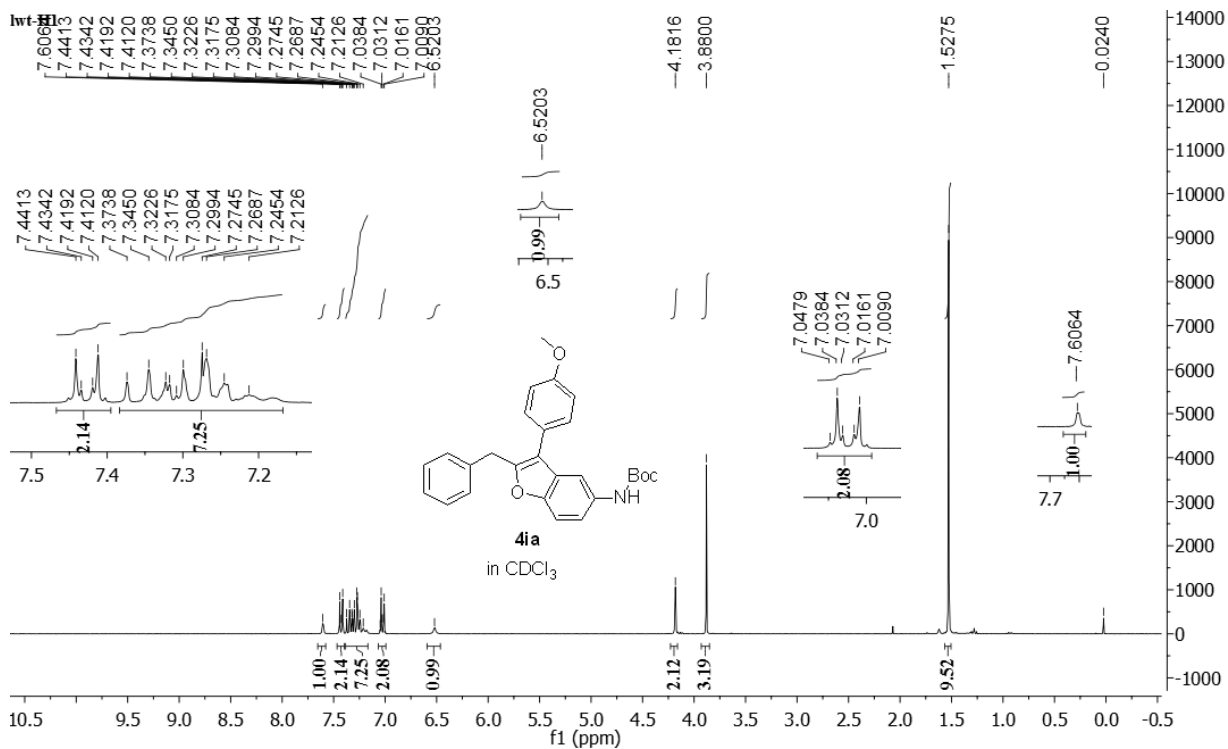

LWT-13C  
LWT-2013-0726

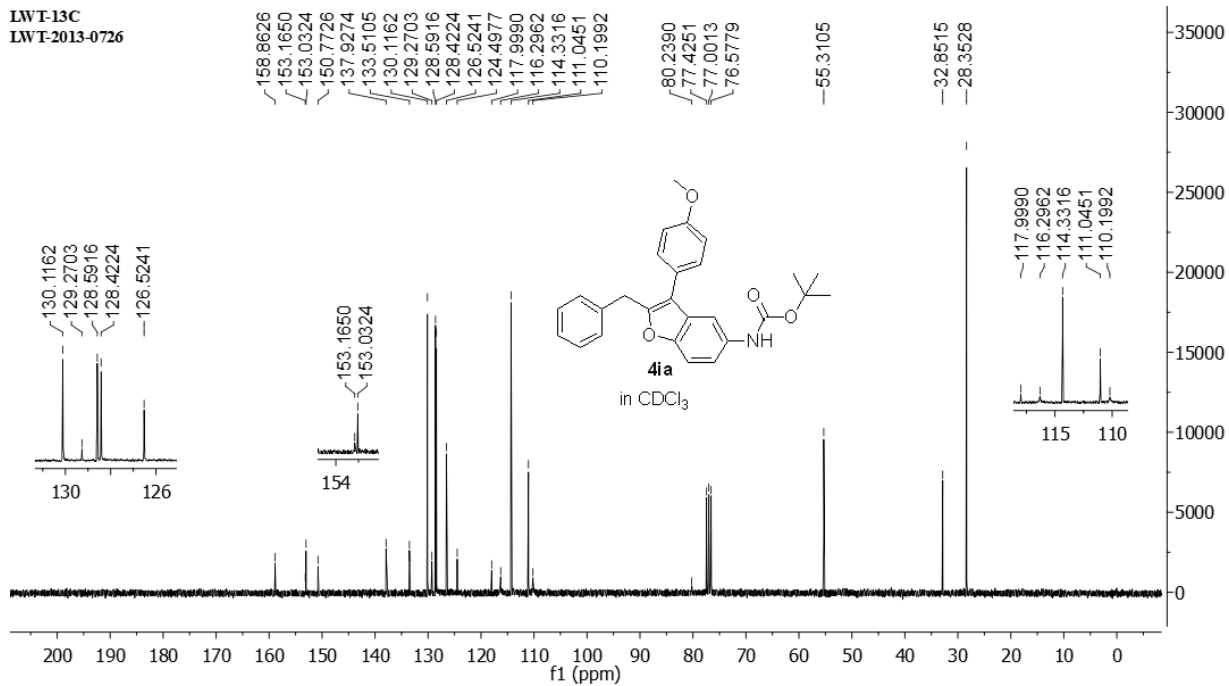

Shanghai Mass Spectrometry Center  
 Shanghai Institute of Organic Chemistry  
 Chinese Academy of Sciences  
 High Resolution MS Data Report

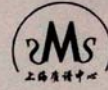

Instrument

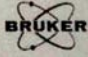

Bruker Daltonics, Inc. APEXIII 7.0 TESLA FTMS

Card Serial Number E140741  
 Analysis Name D:\Data\zjf\2014\20140513\_000012.d  
 Sample Name 2009146-10-24-63-4IA  
 Acquisition Date 5/11/2014 1:53:10 PM  
 Operator: zjf  
 Ionization Mode ESI-Positive  
 Ion Mass (Measured) 452.1840

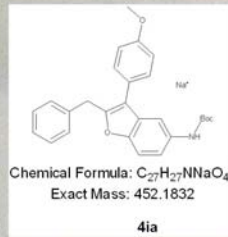

| Sum Formula            | Sigma | m/z      | Err [ppm] | Mean Err [ppm] | Err [mDa] | rdb   | N Rule | e <sup>-</sup> |
|------------------------|-------|----------|-----------|----------------|-----------|-------|--------|----------------|
| C 27 H 27 N 1 Na 1 O 4 | 0.006 | 452.1832 | -1.64     | -2.06          | -0.74     | 14.50 | ok     | even           |
| C 26 H 28 O 7          | 0.010 | 452.1830 | -2.25     | -2.63          | -1.02     | 13.00 | ok     | odd            |
| C 29 H 26 N 1 O 4      | 0.012 | 452.1856 | 3.67      | 3.22           | 1.66      | 17.50 | ok     | even           |
| C 30 H 25 N 2 Na 1 O 1 | 0.019 | 452.1859 | 4.28      | 3.79           | 1.94      | 19.00 | ok     | odd            |
| C 21 H 30 N 3 O 6 S 1  | 0.029 | 452.1850 | 2.23      | 1.10           | 1.01      | 8.50  | ok     | even           |
| C 21 H 33 Na 1 O 7 S 1 | 0.034 | 452.1839 | -0.12     | -1.08          | -0.05     | 5.00  | ok     | odd            |

# tert-butyl (3-(4-methoxyphenyl)-2-pentylbenzofuran-5-yl)carbamate (4if)

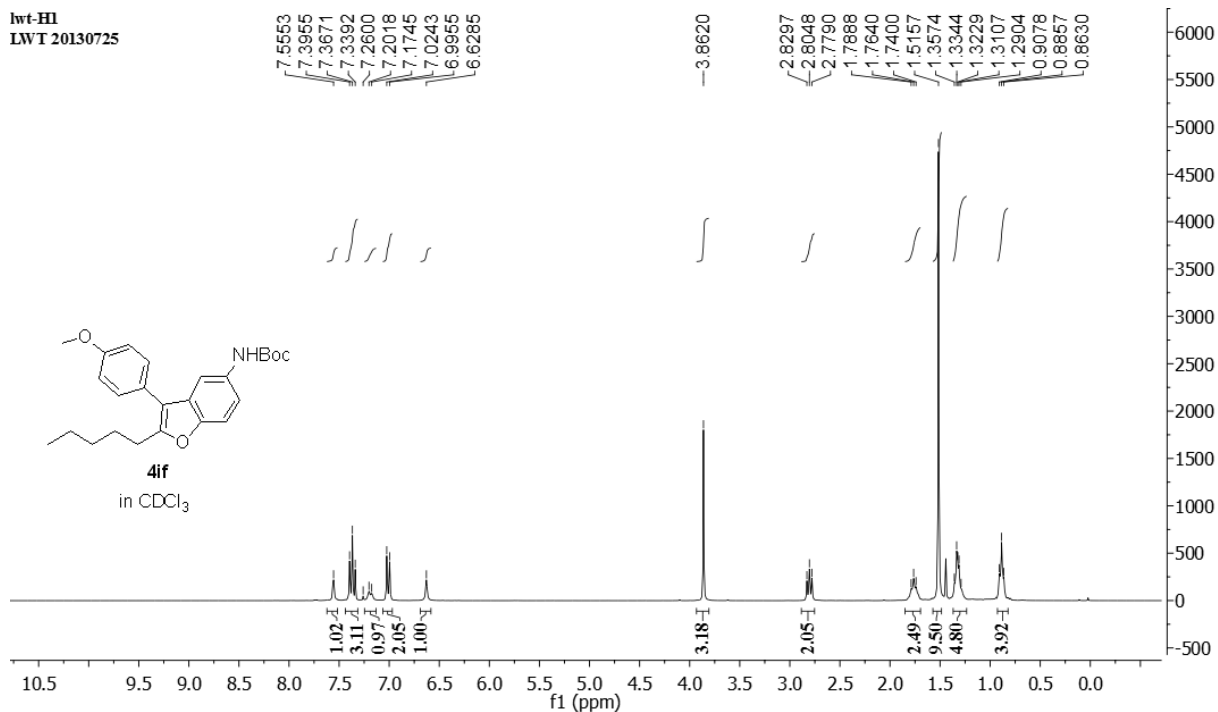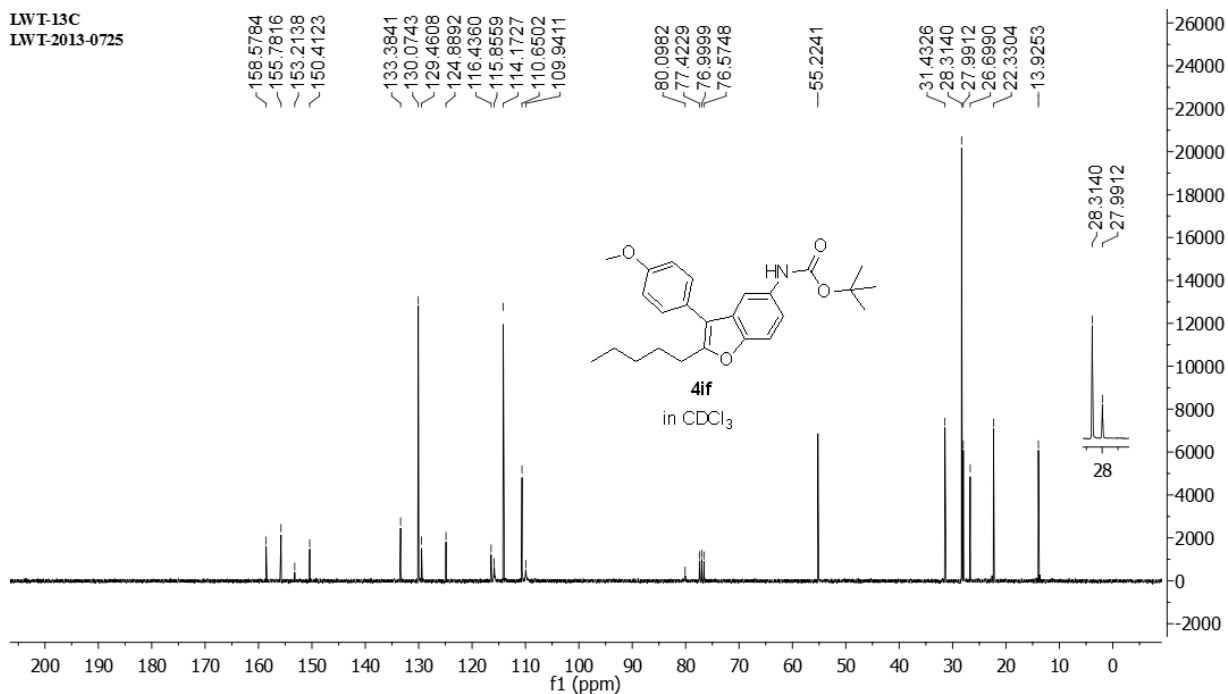



## Qualitative Analysis Report

|                               |                 |                      |                      |
|-------------------------------|-----------------|----------------------|----------------------|
| <b>Data Filename</b>          | WorklistData7.d | <b>Sample Name</b>   | NC                   |
| <b>Sample Type</b>            | Sample          | <b>Position</b>      | P1-A7                |
| <b>Instrument Name</b>        | Instrument 1    | <b>User Name</b>     |                      |
| <b>Acq Method</b>             |                 | <b>Acquired Time</b> | 1/29/2013 1:06:41 PM |
| <b>IRM Calibration Status</b> | Success         | <b>DA Method</b>     | test-1.m             |
| <b>Comment</b>                |                 |                      |                      |

|                               |                                                     |              |
|-------------------------------|-----------------------------------------------------|--------------|
| <b>Sample Group</b>           |                                                     | <b>Info.</b> |
| <b>Acquisition SW Version</b> | 6200 series TOF/6500 series Q-TOF B.05.00 (B5042.2) |              |

### User Spectra

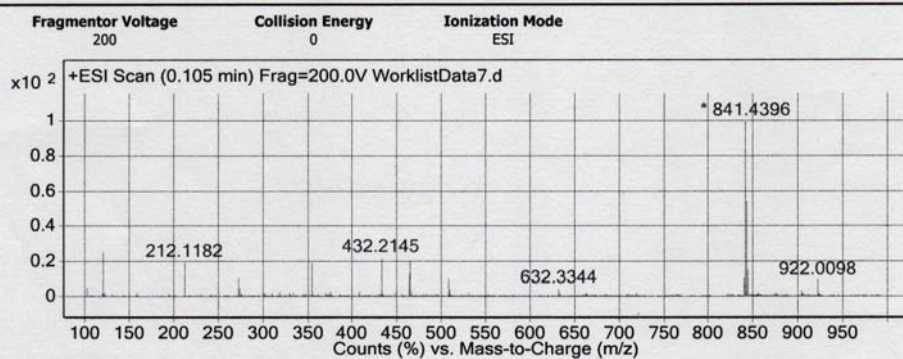

#### Peak List

| <i>m/z</i> | <i>z</i> | Abund      |
|------------|----------|------------|
| 121.0509   | 1        | 375985.77  |
| 212.1182   | 1        | 286070.17  |
| 273.0513   | 1        | 165855.94  |
| 354.1699   | 1        | 286933.21  |
| 432.2145   | 1        | 335504.08  |
| 464.204    | 1        | 301068.62  |
| 839.4236   | 1        | 154811.95  |
| 841.4396   | 1        | 1476907.22 |
| 842.4427   | 1        | 800336.08  |
| 843.445    | 1        | 225525.79  |

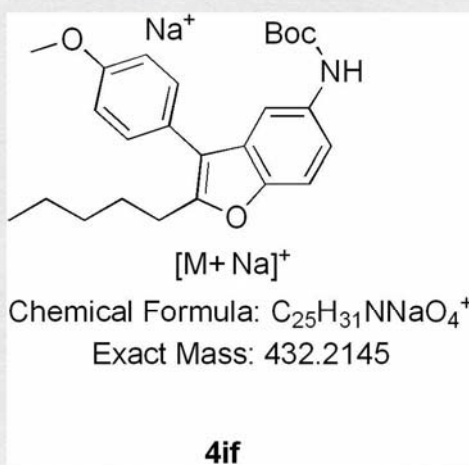

# 1-(4-methoxyphenyl)-2-pentyl-naphtho[2,1-b]furan (4cf)

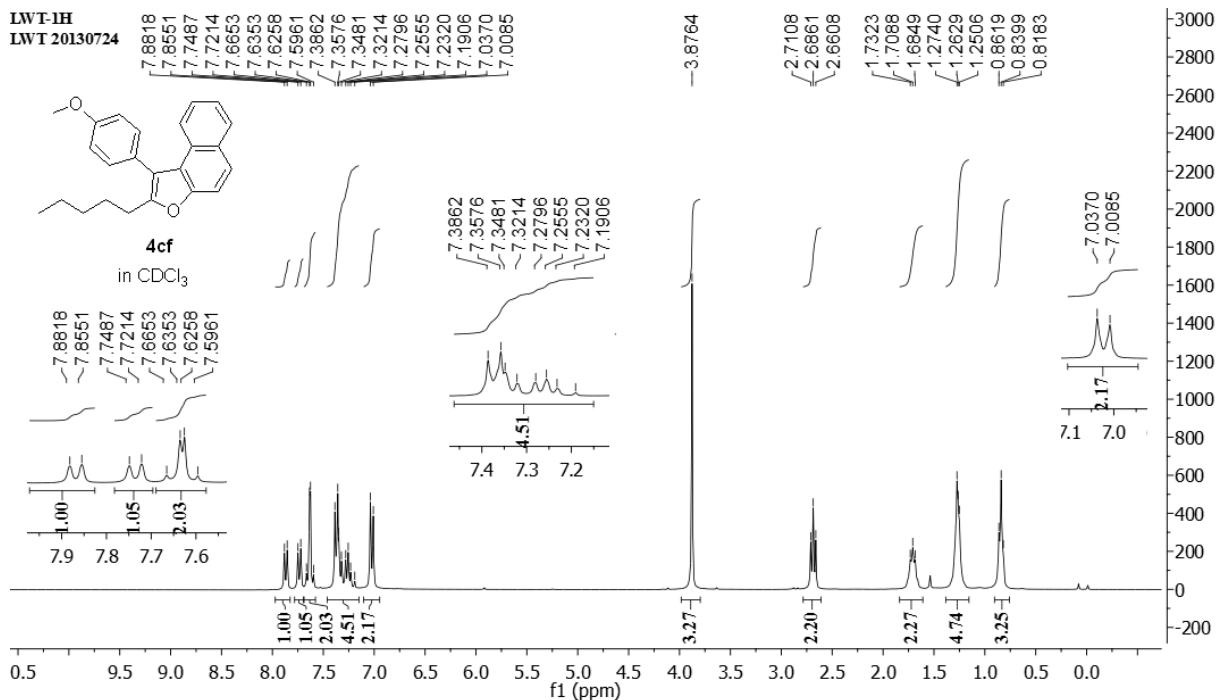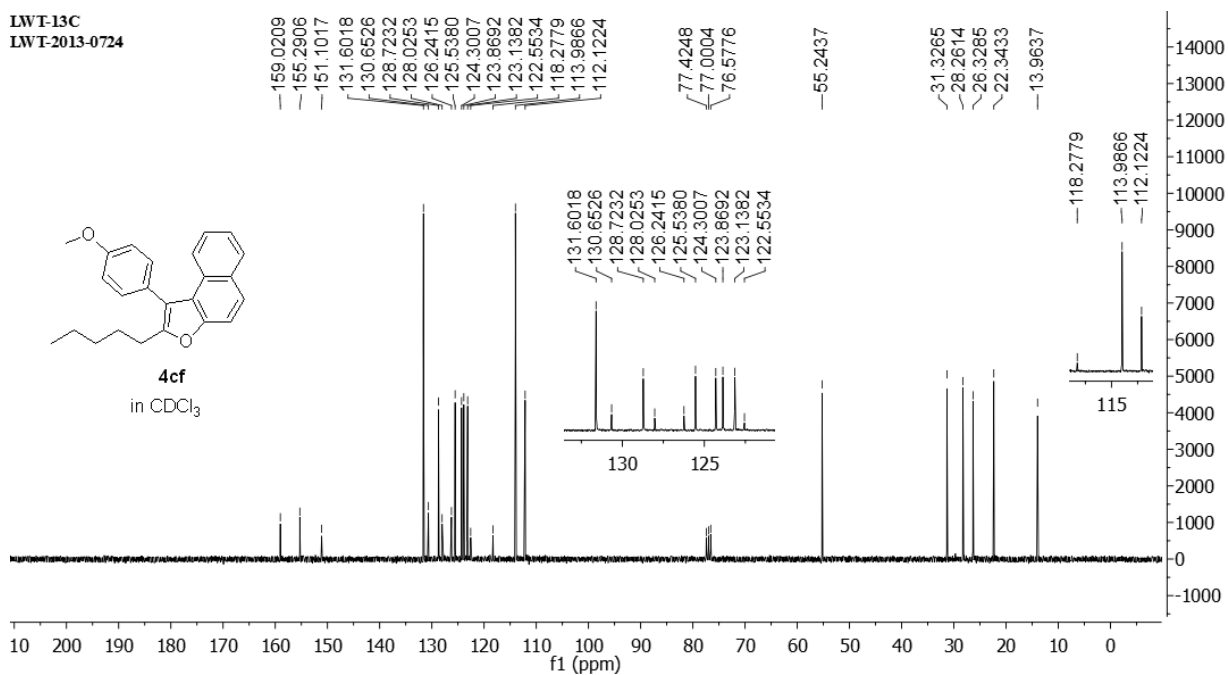

|               |                  |             |            |                 |              |                        |                        |
|---------------|------------------|-------------|------------|-----------------|--------------|------------------------|------------------------|
| Sample Name   | LWT-18           | Position    | P1-B9      | Instrument Name | Instrument 1 | User Name              |                        |
| Inj Vol       | 10               | InjPosition |            | SampleType      | Sample       | IRM Calibration Status | Success                |
| Data Filename | WorklistData18.d | ACQ Method  | YLF-AMPK.m | Comment         |              | Acquired Time          | 10/10/2013 10:33:00 AM |

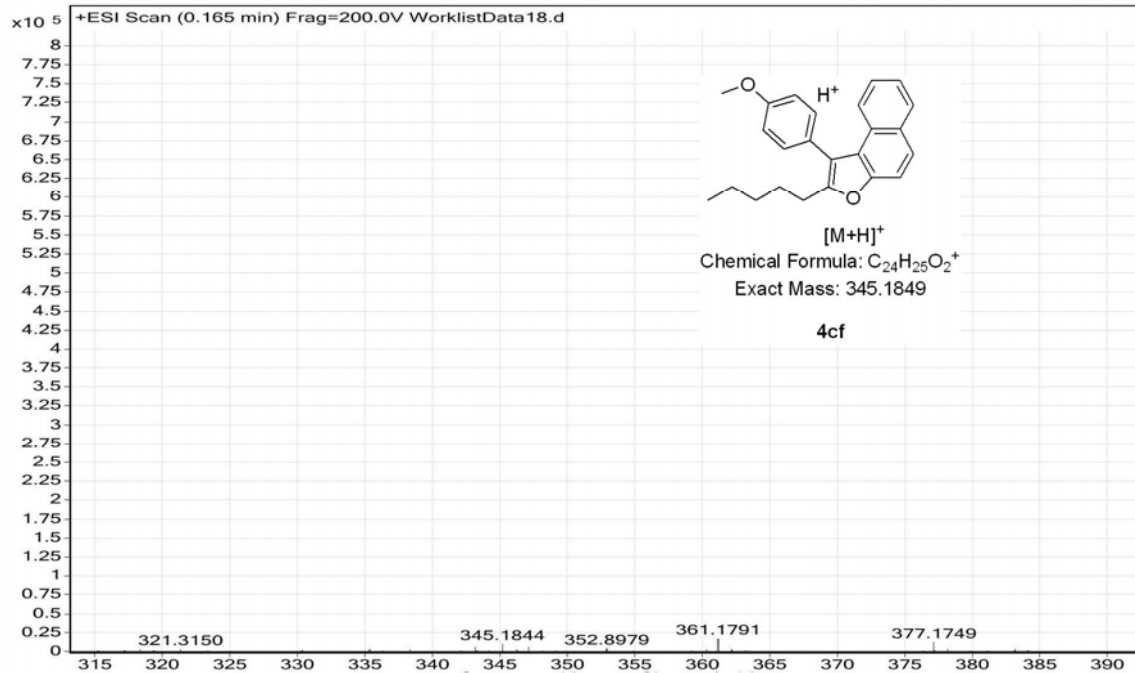

Supplement: c4ra05503a1.pdf [file c4ra05503a1.pdf]
